# Supplementary material for: Transcriptomic Responses of Salvia hispanica to the Infestation of Red Spider Mites (Tetranychus neocaledonicus)
Source: Int J Mol Sci. 2023 Jul 31;24(15):12261. doi: 10.3390/ijms241512261 (PMC10418447; doi:10.3390/ijms241512261)
Supplement: Supplementary file 1 [file ijms-24-12261-s001.zip › ijms-2507279-supplementary.xlsx]

## Sheet: Table_S1
Table S1 Summary statistics of cleaned paired-end reads and aligned efficiency against the reference genome for individual samples.
Samples	Group	Clean reads (M)	Uniquely mapped (%)	Mapped to multiple loci (%)
Control_1	Control	17.9	89.85	9.2
Control_2	Control	18.2	91.41	8.02
Control_3	Control	35	91.53	8.12
Mite_1	Mite infested	15.9	83.96	15.52
Mite_2	Mite infested	26.2	79.68	19.58
Mite_3	Mite infested	15.9	87.26	12.16

## Sheet: Table_S2
Table S2 Differentially expressed genes (DEGs) between mite-feeding and control leaves of chia and annotation against Arabidopsis reference genome (TAIR10)
Gene_ID	logFC	logCPM	FDR	Regulation	Annotation_ID	Description	label
SHI_00004567-RA	9.52278	5.01585	1.96e-74	Up	AT1G62300	Encodes a transcription factor WRKY6. Regulates Phosphate1 (Pho1) expression in response to low phosphate (Pi) stress.	WRKY6
SHI_00014904-RA	8.84153	6.33651	1.05e-58	Up	AT1G23800	Encodes a mitochondrial aldehyde dehydrogenase	ALDH2B7
SHI_00004267-RA	7.82491	5.5412	5.1e-55	Up	AT4G20970	basic helix-loop-helix (bHLH) DNA-binding superfamily protein	AT4G20970
SHI_00005739-RA	8.58219	5.44439	1.58e-53	Up	AT3G27400	Encodes a pectate lyase involved in response to nematodes.	PLL18
SHI_00009546-RA	9.21322	6.8981	3.67e-53	Up	AT5G67150	HXXXD-type acyl-transferase family protein	AT5G67150
SHI_00008724-RA	8.51052	5.20661	6.35e-52	Up	AT2G15730	P-loop containing nucleoside triphosphate hydrolases superfamily protein	AT2G15730
SHI_00023269-RA	5.00617	5.7748	1.36e-51	Up	AT1G66920	Protein kinase superfamily protein	AT1G66920
SHI_00007639-RA	11.6285	3.65782	1.58e-51	Up	AT1G14550	Peroxidase superfamily protein	AT1G14550
SHI_00021871-RA	6.12178	5.58897	1.2e-50	Up	AT2G34390	aquaporin NIP2.1	NIP2;1
SHI_00026464-RA	7.21442	6.84989	1.23e-49	Up	AT5G49700	Putative AT-hook DNA-binding family protein	AHL17
SHI_00029087-RA	9.04125	4.82293	1.27e-49	Up	AT2G14060	encodes a protein whose sequence is similar to SAM:salicylic acid carboxyl methyltransferase (SAMT) (GI:6002712)(Clarkia breweri) and to SAM:benzoic acid carboxyl methyltransferase (BAMT)(GI:9789277)(Antirrhinum majus)	AT2G14060
SHI_00015034-RA	9.35186	7.39768	1.2e-48	Up	AT1G14220	Ribonuclease T2 family protein	AT1G14220
SHI_00015433-RA	15.0818	7.10088	3.46e-44	Up	AT1G52200	PLAC8 family protein	AT1G52200
SHI_00000340-RA	9.69289	7.13494	1.4e-41	Up	AT1G28370	encodes a member of the ERF (ethylene response factor) subfamily B-1 of ERF/AP2 transcription factor family. The protein contains one AP2 domain. There are 15 members in this subfamily including ATERF-3, ATERF-4, ATERF-7, and leafy petiole.	ERF11
SHI_00018055-RA	9.46234	6.08664	4.12e-41	Up	AT2G06530	SNF7 family protein	VPS2.1
SHI_00021599-RA	4.47842	6.04114	1.42e-38	Up	AT4G14420	HR-like lesion-inducing protein-like protein	AT4G14420
SHI_00007033-RA	10.5255	9.13899	4.56e-38	Up	AT5G39580	Peroxidase superfamily protein	AT5G39580
SHI_00011301-RA	5.41701	4.63148	4.14e-36	Up	AT1G21670	DPP6 amino-terminal domain protein	AT1G21670
SHI_00027151-RA	4.79705	6.24012	6.56e-36	Up	AT2G42570	Encodes a member of the TBL (TRICHOME BIREFRINGENCE-LIKE) gene family containing a plant-specific DUF231 (domain of unknown function) domain. TBL gene family has 46 members, two of which (TBR/AT5G06700 and TBL3/AT5G01360) have been shown to be involved in the synthesis and deposition of secondary wall cellulose, presumably by influencing the esterification state of pectic polymers. A nomenclature…	TBL39
SHI_00010728-RA	9.20913	3.06412	8.18e-35	Up	AT3G53200	Member of the R2R3 factor gene family.	MYB27
SHI_00003911-RA	7.13866	7.92626	9.95e-35	Up	AT4G37990	Encodes an aromatic alcohol:NADP+ oxidoreductase whose mRNA levels are increased in response to treatment with a variety of phytopathogenic bacteria. Though similar to mannitol dehydrogenases, this enzyme does not have mannitol dehydrogenase activity.	ELI3-2
SHI_00003181-RA	5.47884	5.18067	1.41e-34	Up	AT1G07380	Encodes a neutral ceramidase that is involved in sphingolipid homeostasis and responses to oxidative stress.	ATNCER1
SHI_00023657-RA	5.50484	3.80785	5.01e-33	Up	AT1G65790	An alternatively spliced gene that encodes a functional transmembrane receptor serine/threonine kinase, alternate form may not have transmembrane domain.	RK1
SHI_00003189-RA	4.4443	6.43823	5.07e-33	Up	AT4G34640	Encodes squalene synthase, which converts two molecules of farnesyl diphosphate (FPP) into squalene via an intermediate: presqualene diphosphate (PSPP). It is generally thought to be one of the key enzymes of sterol biosynthesis, since it catalyzes the first pathway-specific reaction of the sterol branch of the isoprenoid pathway. The mRNA is cell-to-cell mobile.	SQS1
SHI_00006353-RA	10.5829	8.42078	6.41e-32	Up	AT4G30030	Eukaryotic aspartyl protease family protein	AT4G30030
SHI_00002907-RA	7.36438	4.0089	1.17e-31	Up	AT1G59950	NAD(P)-linked oxidoreductase superfamily protein	AT1G59950
SHI_00011066-RA	5.46	4.89528	1.17e-31	Up	AT4G20780	Calcium sensor involved in trichome branching.	CML42
SHI_00005476-RA	4.72057	7.79041	1.22e-31	Up	AT3G54250	Encodes mevalonate diphosphate decarboxylase, the enzyme that catalyzes the synthesis of isopentenyl diphosphate, used in sterol and isoprenoid biosynthesis.	MDD2
SHI_00023476-RA	5.68843	7.58225	2.02e-31	Up	AT4G17190	Encodes a protein with farnesyl diphosphate synthase activity, which catalyzes the rate limiting step in isoprenoid biosynthesis. Its mRNA is most abundantly expressed in flowers.	FPS2
SHI_00016720-RA	-5.52666	3.38071	2.53e-31	Down	AT5G39860	Encodes PRE1 (PACLOBUTRAZOL RESISTANCE1). PRE1 and IBH1 form a pair of antagonistic HLH/bHLH transcription factors that function downstream of BZR1 to mediate brassinosteroid regulation of cell elongation. BNQ1 is directly and negatively regulated by AP3 and PI in petals.Required for appropriate regulation of flowering time.	PRE1
SHI_00028719-RA	4.78918	7.49807	3.1e-31	Up	AT5G38120	AMP-dependent synthetase and ligase family protein	4CL8
SHI_00016473-RA	7.70203	6.12036	7.56e-31	Up	AT1G03230	Eukaryotic aspartyl protease family protein	SAP1
SHI_00004889-RA	5.86767	8.10753	1e-30	Up	AT5G36110	Encodes a member of the CYP716A subfamily of cytochrome P450 monooxygenases with triterpene oxidizing activity catalyzing C-28 hydroxylation of alpha-amyrin, beta-amyrin, and lupeol, producing uvaol, erythrodiol, and betulin, respectively. Additionally, it shows carboxylation activity for the C-28 position of alpha- and beta-amyrin.	CYP716A1
SHI_00000228-RA	10.363	7.28714	1e-30	Up	AT3G21500	Encodes a protein postulated to have 1-deoxy-D-xylulose 5-phosphate synthase activity.	DXPS1
SHI_00018392-RA	4.68162	7.48765	1.13e-30	Up	AT3G06650	One of the two genes encoding subunit B of the trimeric enzyme ATP Citrate lyase	ACLB-1
SHI_00018559-RA	6.21218	5.64533	1.24e-30	Up	AT2G32800	protein kinase family protein	LECRK-S.2
SHI_00022067-RA	4.58522	6.31205	1.51e-30	Up	AT1G01600	Encodes a member of the CYP86A subfamily of cytochrome p450 genes. Expressed significantly at highest level in mature stems and flowers.	CYP86A4
SHI_00004325-RA	9.7279	3.58194	2.68e-30	Up	AT1G29860	member of WRKY Transcription Factor	WRKY71
SHI_00007788-RA	6.3098	5.96566	2.68e-30	Up	AT4G38540	FAD/NAD(P)-binding oxidoreductase family protein	AT4G38540
SHI_00002119-RA	7.96416	3.12684	4.62e-30	Up	AT1G68200	Zinc finger C-x8-C-x5-C-x3-H type family protein	CDM1
SHI_00028651-RA	-3.64363	4.35317	1.66e-29	Down	AT2G19810	Encodes Oxidation-related Zinc Finger 1 (OZF1), a plasma membrane protein involved in oxidative stress.	OZF1
SHI_00002880-RA	5.23779	3.75174	2.41e-29	Up	AT5G23160	transmembrane protein	AT5G23160
SHI_00011020-RA	5.51351	3.83713	3.19e-29	Up	AT3G11740	LURP-one-like protein (DUF567)	AT3G11740
SHI_00021521-RA	5.57891	6.39292	3.47e-29	Up	AT5G13740	Encodes ZIF1 (ZINC-INDUCED FACILITATOR1), a member of the Major Facilitator Superfamily (MFS) of membrane proteins which are found in all organisms and transport a wide range of small, organic molecules. Involved in a mechanism of Zn sequestration, possibly by transport of a Zn ligand or Zn-ligand complex into vacuoles. The mRNA is cell-to-cell mobile.	ZIF1
SHI_00017869-RA	4.38232	7.83239	6.94e-29	Up	AT4G11820	Encodes a protein with hydroxymethylglutaryl-CoA synthase activity which was characterized by phenotypical complementation of the S. cerevisiae mutant. Involved in glucosinolate biosynthesis.	HMGS
SHI_00003908-RA	9.17136	6.05216	8.41e-29	Up	AT4G37980	NADPH-dependent cinnamaldehyde and hexenal reductase involved in the production of green leaf volitile compounds.	ELI3-1
SHI_00023469-RA	5.46495	5.15022	8.43e-28	Up	AT1G67800	Copine (Calcium-dependent phospholipid-binding protein) family	RGLG5
SHI_00018142-RA	4.52525	6.3969	1.1e-27	Up	AT5G36150	putative pentacyclic triterpene synthase 3	PEN3
SHI_00027352-RA	5.95037	3.72389	1.1e-27	Up	AT4G18170	Member of WRKY Transcription Factor	WRKY28
SHI_00008777-RA	7.39992	2.90267	1.17e-27	Up	AT4G34138	UDP-glucosyl transferase 73B1	UGT73B1
SHI_00016694-RA	-3.98101	4.27929	1.89e-27	Down	AT5G07700	Encodes a putative transcription factor (MYB76).	MYB76
SHI_00010459-RA	6.06931	4.7317	2.12e-27	Up	AT2G28710	C2H2-type zinc finger family protein	AT2G28710
SHI_00030522-RA	5.33417	3.86708	1.66e-26	Up	AT4G21380	encodes a putative receptor-like serine/threonine protein kinases that is similar to Brassica self-incompatibility (S) locus. Expressed in root. Shoot expression limited to limited to the root-hypocotyl transition zone and at the base of lateral roots as well as in axillary buds, and pedicels.	RK3
SHI_00011753-RA	-6.4565	2.69183	2.36e-26	Down	AT3G50630	Kip-related protein (KRP) gene, encodes CDK (cyclin-dependent kinase) inhibitor (CKI), negative regulator of cell division. A member of seven KRP genes found in Arabidopsis thaliana. Differential expression patterns for distinct KRPs were revealed by in situ hybridization. Gene was isolated from a yeast two hybrid screen as an interacting protein of CDC2A. Recombinant protein has a strong kinase …	KRP2
SHI_00015178-RA	6.11877	6.50588	2.93e-26	Up	AT1G49000	transmembrane protein	AT1G49000
SHI_00013293-RA	5.26763	5.52592	3.43e-26	Up	AT1G76070	hypothetical protein	AT1G76070
SHI_00023455-RA	-4.27352	8.30592	3.82e-26	Down	AT5G37540	Eukaryotic aspartyl protease family protein	AT5G37540
SHI_00012979-RA	4.35087	7.37633	3.91e-26	Up	AT1G33590	Leucine-rich repeat (LRR) family protein	AT1G33590
SHI_00000851-RA	4.44002	7.4391	3.96e-26	Up	AT1G62790	Bifunctional inhibitor/lipid-transfer protein/seed storage 2S albumin superfamily protein	LTPG7
SHI_00025634-RA	8.21111	6.16113	4.33e-26	Up	AT5G21100	Plant L-ascorbate oxidase	AT5G21100
SHI_00019761-RA	6.60732	5.46082	1.36e-25	Up	AT2G23320	Encodes WRKY DNA-binding protein 15 (WRKY15).	WRKY15
SHI_00021244-RA	3.62674	5.53961	1.67e-25	Up	AT5G11670	The malic enzyme (EC 1.1.1.40) encoded by AtNADP-ME2 is presumably a cytosolic enzyme involved in malate metabolism and possibly assisting the oxidative pentose phosphate pathway. AtNADP-ME2 counts for the major part of NADP-ME activity in mature tissues of Arabidopsis.	NADP-ME2
SHI_00006190-RA	7.79594	3.31831	2.5e-25	Up	AT1G78940	kinase with adenine nucleotide alpha hydrolases-like domain-containing protein	AT1G78940
SHI_00024815-RA	4.82216	3.64114	5.29e-25	Up	AT3G44870	Encodes a protein with 93% identity to a farnesoic acid methyl transferase. SABATH family methyltransferase.	FAMT-L
SHI_00001136-RA	-4.98794	5.0228	7.17e-25	Down	AT2G01540	Calcium-dependent lipid-binding (CaLB domain) family protein	CAR10
SHI_00014191-RA	6.2864	3.96414	1.25e-24	Up	AT2G41690	member of Heat Stress Transcription Factor (Hsf) family	HSFB3
SHI_00011281-RA	3.44622	4.38712	1.9e-24	Up	AT1G66930	Protein kinase superfamily protein	LRK10L2
SHI_00017381-RA	8.48054	8.48895	2.13e-24	Up	AT5G55050	GDSL-motif esterase/acyltransferase/lipase. Enzyme group with broad substrate specificity that may catalyze acyltransfer or hydrolase reactions with lipid and non-lipid substrates. The mRNA is cell-to-cell mobile.	AT5G55050
SHI_00018690-RA	7.3425	3.11773	2.13e-24	Up	AT5G18840	Major facilitator superfamily protein	AT5G18840
SHI_00021000-RA	7.34455	3.35923	2.36e-24	Up	AT5G46330	Encodes a leucine-rich repeat serine/threonine protein kinase that is expressed ubiquitously. FLS2 is involved in MAP kinase signalling relay involved in innate immunity. Essential in the perception of flagellin, a potent elicitor of the defense response. FLS2 is directed for degradation by the bacterial ubiquitin ligase AvrPtoB. The mRNA is cell-to-cell mobile.	FLS2
SHI_00021950-RA	5.80247	7.26531	2.67e-24	Up	AT1G66960	Terpenoid cyclases family protein	LUP5
SHI_00016179-RA	5.9736	6.65173	2.8e-24	Up	AT1G08090	High-affinity nitrate transporter. Up-regulated by nitrate. Functions as a repressor of lateral root initiation independently of nitrate uptake.	NRT2:1
SHI_00001336-RA	3.69467	5.36962	3.79e-24	Up	AT5G28830	calcium-binding EF hand family protein	AT5G28830
SHI_00003104-RA	-3.65094	6.54181	4.35e-24	Down	AT1G55260	Bifunctional inhibitor/lipid-transfer protein/seed storage 2S albumin superfamily protein	LTPG6
SHI_00026621-RA	6.89329	8.2579	6.39e-24	Up	AT4G37400	member of CYP81F	CYP81F3
SHI_00005196-RA	5.21455	4.88143	6.47e-24	Up	AT3G46110	DUF966 domain containing protein, expressed during embryogenesis.	SOK4
SHI_00011041-RA	5.73492	4.0286	7.38e-24	Up	AT3G51590	Encodes a member of the lipid transfer protein family. Proteins of this family are generally small (~9 kD), basic, expressed abundantly and contain eight Cys residues. The proteins can bind fatty acids and acylCoA esters and can transfer several different phospholipids. They are localized to the cell wall. The LTP12 promoter is active exclusively in the tapetum during the uninucleate microspore a…	LTP12
SHI_00001126-RA	7.58038	2.22417	1.09e-23	Up	AT5G06720	Encodes a peroxidase with diverse roles in the wound response, flower development, and syncytium formation.	PA2
SHI_00018367-RA	6.12998	5.12474	1.48e-23	Up	AT1G15000	serine carboxypeptidase-like 50	SCPL50
SHI_00027417-RA	4.72005	8.16708	1.78e-23	Up	AT5G61030	Encodes a glycine-rich RNA binding protein that is involved in C-> U RNA editing in mitochondria. Gene expression is induced by cold. The mRNA is cell-to-cell mobile.	RBGA7
SHI_00002344-RA	7.0163	7.26456	3.49e-23	Up	AT5G14570	Encodes ATNRT2.7, a nitrate transporter that controls nitrate content in seeds. Expression is detected in reproductive organs and peaks in seeds. Localized to the vacuolar membrane.	NRT2.7
SHI_00014967-RA	4.89016	5.69176	4.07e-23	Up	AT5G62630	hipl2 protein precursor	HIPL2
SHI_00003528-RA	5.1292	4.83681	4.08e-23	Up	AT3G48090	Component of R gene-mediated disease resistance in Arabidopsis thaliana with homology to eukaryotic lipases.	EDS1
SHI_00023046-RA	8.25495	4.10451	5.31e-23	Up	AT5G64750	Encodes a putative transcription factor containing an AP2 domain. Is a member of the ERF (ethylene response factor) subfamily B-4 of ERF/AP2 transcription factor family. Expressed in response to ABA, osmotic stress, sugar stress and drought. Mutants are hypersensitive to these stresses. May be involved in regulation of ABA mediated stress response. The mRNA is cell-to-cell mobile.	ABR1
SHI_00021593-RA	-4.81533	3.74323	5.58e-23	Down	AT3G22540	hypothetical protein (DUF1677)	AT3G22540
SHI_00025787-RA	-2.83062	5.24713	6.95e-23	Down	AT4G24530	O-fucosyltransferase family protein	AT4G24530
SHI_00003923-RA	7.099	8.29848	8.53e-23	Up	AT2G21890	cinnamyl alcohol dehydrogenase homolog 3	CAD3
SHI_00010711-RA	3.62201	6.5244	1.08e-22	Up	AT1G05530	Encodes a protein with glucosyltransferase activity with high sequence homology to UGT1 (AT1G05560). It belongs to an UGT subfamily that binds UDP-glucose but not UDP-glucuronate, UDP-galactose, or UDP-rhamnose as the glycosyl donor. UGT2 was shown to be able to use abscisic acid as glycosylation substrate in the presence of UDP-glucose.	UGT75B2
SHI_00022562-RA	6.67178	3.53101	2.16e-22	Up	AT2G27660	Cysteine/Histidine-rich C1 domain family protein	AT2G27660
SHI_00011921-RA	-6.63883	2.81731	2.29e-22	Down	AT3G52561	hypothetical protein	AT3G52561
SHI_00013307-RA	6.34486	3.28853	2.97e-22	Up	AT5G23610	DYAD protein	AT5G23610
SHI_00029734-RA	7.51601	2.1871	3.37e-22	Up	AT1G03800	encodes a member of the ERF (ethylene response factor) subfamily B-1 of ERF/AP2 transcription factor family (ATERF-10). The protein contains one AP2 domain. There are 15 members in this subfamily including ATERF-3, ATERF-4, ATERF-7, and leafy petiole.	ERF10
SHI_00007686-RA	11.4028	3.43809	3.8e-22	Up	AT4G15350	member of CYP705A	CYP705A2
SHI_00008930-RA	4.19453	5.93779	4.5e-22	Up	AT5G64410	oligopeptide transporter	OPT4
SHI_00021272-RA	5.99444	3.66277	5.58e-22	Up	AT5G59370	Encodes one of eight Arabidopsis actins. ACT4 belongs to the reproductive actin subclass which is predominantly expressed in developing and reproductive tissues, such as pollen, pollen tubes, ovules, and developing seeds. Expression of the ACT4/GUS fusion was restricted to young vascular tissues, tapetum, and developing and mature pollen.	ACT4
SHI_00025522-RA	9.96065	2.01547	6.39e-22	Up	AT1G55210	Disease resistance-responsive (dirigent-like protein) family protein	AT1G55210
SHI_00011536-RA	8.84583	5.40819	9.02e-22	Up	AT2G30150	UDP-Glycosyltransferase superfamily protein	AT2G30150
SHI_00022495-RA	6.28851	6.6212	1.03e-21	Up	AT3G03530	PHOSPHOESTERASE FAMILY PROTEIN, NPC4 is significantly induced upon phosphate starvation and plays an important role in the supply of inorganic phosphate and diacylglycerol from membrane-phospholipids during phosphate deprivation.	NPC4
SHI_00021951-RA	-3.86679	6.67835	1.38e-21	Down	AT1G78960	Encodes a multifunctional 2-3-oxidosqualene (OS)-triterpene cyclase that can cyclize OS into lupeol, alpha- and beta-amyrin.	LUP2
SHI_00002761-RA	-4.00076	4.08988	1.38e-21	Down	AT1G67590	Remorin family protein	AT1G67590
SHI_00018072-RA	8.27113	2.14716	1.61e-21	Up	AT5G35580	Protein kinase superfamily protein	PBL13
SHI_00025726-RA	6.27682	5.9372	1.64e-21	Up	AT5G01370	Nuclear protein with a lysine-rich domain and a C-terminal serine-rich domain. Interacts with Alcatraz (ALC). ACI1 is mainly expressed in the vascular system. Involved in cell separation during fruit dehiscence.	ACI1
SHI_00030360-RA	5.09667	4.65497	1.78e-21	Up	AT3G12910	NAC (No Apical Meristem) domain transcriptional regulator superfamily protein	AT3G12910
SHI_00018716-RA	8.01707	3.49727	1.89e-21	Up	AT5G48430	Eukaryotic aspartyl protease family protein	AT5G48430
SHI_00011507-RA	4.55705	7.63741	3.01e-21	Up	AT3G54420	encodes an EP3 chitinase that is expressed during somatic embryogenesis in 'nursing' cells surrounding the embryos but not in embryos themselves. The gene is also expressed in mature pollen and growing pollen tubes until they enter the receptive synergid, but not in endosperm and integuments as in carrot. Post-embryonically, expression is found in hydathodes, stipules, root epidermis and emerging…	EP3
SHI_00014807-RA	-4.24402	9.38191	3.39e-21	Down	AT2G45820	Lipid raft regulatory protein, crucial for plasma membrane nanodomain assembly to control plasmodesmata aperture and functionality.	REM1.3
SHI_00006048-RA	3.45785	6.15369	4.35e-21	Up	AT2G40890	encodes coumarate 3-hydroxylase (C3H), a P450-dependent monooxygenase. Involved in lignin biosynthesis and flavonoid biosynthesis. Also affects the biosynthesis of coumarins such as scopoletin and scopolin as a branching-out-pathway from the phenylpropanoid acid level.	CYP98A3
SHI_00023744-RA	2.89439	5.73953	4.45e-21	Up	AT4G20110	VACUOLAR SORTING RECEPTOR 7	VSR7
SHI_00029436-RA	4.47456	3.56884	1.36e-20	Up	AT3G45700	NPF2.4 is a member of the NAXT NPF subfamily. It encodes a plasmamembrane localized chloride transporter that is expressed in the root and is down regulated in response to ABA and salt treatment. NPF2.3 miRNA induced knockdowns have less Cl in the shoots when grown on low NaCl concentrations.	NPF2.4
SHI_00006837-RA	6.56813	3.21308	1.53e-20	Up	AT4G11210	Disease resistance-responsive (dirigent-like protein) family protein	AT4G11210
SHI_00019972-RA	-3.33424	5.74227	1.87e-20	Down	AT4G27290	S-locus lectin protein kinase family protein	AT4G27290
SHI_00014857-RA	6.25542	2.84195	1.95e-20	Up	AT1G23790	dicer-like protein (DUF936)	CORD4
SHI_00000446-RA	4.25259	5.12309	2e-20	Up	AT4G36640	Sec14p-like phosphatidylinositol transfer family protein	AT4G36640
SHI_00026094-RA	5.94137	5.1256	2e-20	Up	AT3G49580	response to low sulfur 1	LSU1
SHI_00026547-RA	5.48853	7.88669	2.01e-20	Up	AT1G58440	Encodes a putative protein that has been speculated, based on sequence similarities, to have squalene monooxygenase activity.	XF1
SHI_00009372-RA	5.7946	4.51043	2.35e-20	Up	AT4G28390	Encodes a mitochondrial ADP/ATP carrier protein. Shown in heterologous systems to be located in the plasma membrane. Has comparable affinity for ADP and ATP (in E.coli).	AAC3
SHI_00005319-RA	3.84376	5.32028	3.62e-20	Up	AT5G44750	Homologous to Y-family DNA polymerases, contains BRCT domain. Mutants are sensitive to UV-B radiation. Gene is involved in damage-tolerance mechanisms through translesion synthesis(TLS).	REV1
SHI_00025031-RA	6.73898	2.80112	3.74e-20	Up	AT3G16540	Encodes a putative DegP protease.	DEG11
SHI_00000210-RA	4.13641	5.88145	3.87e-20	Up	AT5G37600	encodes a cytosolic glutamine synthetase, the enzyme has high affinity with substrate ammonium	GSR 1
SHI_00024056-RA	6.05545	4.88646	4.73e-20	Up	AT1G28360	encodes a member of the ERF (ethylene response factor) subfamily B-1 of ERF/AP2 transcription factor family (ERF12). The protein contains one AP2 domain. There are 15 members in this subfamily including ATERF-3, ATERF-4, ATERF-7, and leafy petiole. Regulates floral development.	ERF12
SHI_00006203-RA	-3.19127	6.27632	4.79e-20	Down	AT1G35540	auxin response factor 14	ARF14
SHI_00024691-RA	-3.77913	5.21925	4.79e-20	Down	AT1G18330	EARLY-PHYTOCHROME-RESPONSIVE1	EPR1
SHI_00018227-RA	7.53475	2.20984	5.23e-20	Up	AT4G17500	Encodes a member of the ERF (ethylene response factor) subfamily B-3 of ERF/AP2 transcription factor family (ATERF-1). The protein contains one AP2 domain. There are 18 members in this subfamily including ATERF-1, ATERF-2, AND ATERF-5. The mRNA is cell-to-cell mobile.	ERF-1
SHI_00024567-RA	-5.45066	4.3925	5.46e-20	Down	AT2G40435	transcription factor SCREAM-like protein	AT2G40435
SHI_00004442-RA	5.33265	3.14151	5.61e-20	Up	AT4G15417	RNAse II-like 1	RTL1
SHI_00018794-RA	5.88783	2.4795	9.4e-20	Up	AT1G65680	member of BETA-EXPANSINS. Naming convention from the Expansin Working Group (Kende et al, 2004. Plant Mol Bio)	EXPB2
SHI_00020445-RA	5.51412	4.36884	2.14e-19	Up	AT5G25930	kinase family with leucine-rich repeat domain-containing protein	AT5G25930
SHI_00016214-RA	5.79567	4.37549	2.36e-19	Up	AT1G67810	Encodes a protein capable of stimulating the cysteine desulfurase activity of CpNifS (AT1G08490) in vitro. SufE2:GFP localizes to the chloroplasts where it is likely to play a role in iron-sulfur cluster assembly. Transcript levels for this gene are high in the pollen relative to other organs based on RT-PCR analysis. The mRNA is cell-to-cell mobile.	SUFE2
SHI_00027042-RA	-3.68288	6.1381	2.67e-19	Down	AT4G15248	B-box type zinc finger family protein	BBX30
SHI_00021140-RA	-3.39898	4.16074	2.68e-19	Down	AT1G50280	BTB/POZ protein that forms a complex with CUL3a. Involved in repression of ABA responses.	BPH1
SHI_00012187-RA	6.76472	3.24758	2.68e-19	Up	AT1G43160	encodes a member of the ERF (ethylene response factor) subfamily B-4 of ERF/AP2 transcription factor family (RAP2.6). The protein contains one AP2 domain. There are 7 members in this subfamily.	RAP2.6
SHI_00020989-RA	10.019	7.99201	3.2e-19	Up	AT1G29670	GDSL-motif esterase/acyltransferase/lipase. Enzyme group with broad substrate specificity that may catalyze acyltransfer or hydrolase reactions with lipid and non-lipid substrates. The mRNA is cell-to-cell mobile.	GDSL1
SHI_00027977-RA	3.64003	6.55825	4.08e-19	Up	AT1G15950	Encodes a cinnamoyl CoA reductase. Involved in lignin biosynthesis. The mRNA is cell-to-cell mobile.	CCR1
SHI_00013333-RA	-4.47995	2.75363	4.45e-19	Down	AT1G35180	TRAM, LAG1 and CLN8 (TLC) lipid-sensing domain containing protein	AT1G35180
SHI_00022665-RA	-4.8627	4.98901	6.29e-19	Down	AT1G54820	Protein kinase superfamily protein	AT1G54820
SHI_00030014-RA	10.1124	2.16732	6.54e-19	Up	AT5G07430	Pectin lyase-like superfamily protein	AT5G07430
SHI_00026362-RA	5.55276	5.81142	7.01e-19	Up	AT3G60450	Phosphoglycerate mutase family protein	AT3G60450
SHI_00005025-RA	-3.42641	5.50172	7.54e-19	Down	AT2G27090	bZIP transcription factor (DUF630 and DUF632)	AT2G27090
SHI_00014699-RA	3.42957	4.32019	8.99e-19	Up	AT5G16930	AAA-type ATPase family protein	AT5G16930
SHI_00005283-RA	5.99657	4.07587	1.18e-18	Up	AT3G19020	Pollen expressed protein required for pollen tube growth. Along with other members of the LRX family, interacts with RALF4 to control pollen tube growth and integrity. Loss of function results in premature pollen tube rupture and reduced fertility.	LRX8
SHI_00001397-RA	6.63757	2.42551	1.25e-18	Up	AT2G28500	LOB domain-containing protein 11	LBD11
SHI_00018547-RA	4.27625	2.91165	2.98e-18	Up	AT2G02340	phloem protein 2-B8	PP2-B8
SHI_00028661-RA	-3.69049	3.12708	3.27e-18	Down	AT5G56590	O-Glycosyl hydrolases family 17 protein	AT5G56590
SHI_00024441-RA	5.63312	2.11259	3.33e-18	Up	AT3G55470	Calcium-dependent lipid-binding (CaLB domain) family protein	AT3G55470
SHI_00012118-RA	6.97757	2.14155	3.57e-18	Up	AT1G21550	Calcium-binding EF-hand family protein	AT1G21550
SHI_00012144-RA	-5.36488	4.24226	3.57e-18	Down	AT5G17520	Encodes a maltose transporter that is expressed in leaves and roots. Mutations at the MEX1 locus cause accumulation of both starch and maltose in leaves, with maltose levels at least 40 times higher than that of wild-type. This gene encodes a protein located in the chloroplast envelope.	RCP1
SHI_00010935-RA	5.78629	3.02434	3.64e-18	Up	AT2G38060	Encodes an inorganic phosphate transporter (PHT4	PHT4;2
SHI_00008053-RA	6.52978	2.86712	5.1e-18	Up	AT1G57750	Encodes a CYP96A15, midchain alkane hydroxylase, involved in cuticular wax biosynthesis.	CYP96A15
SHI_00029226-RA	4.31887	6.51498	5.39e-18	Up	AT2G44880	Pentatricopeptide repeat (PPR-like) superfamily protein	AHG11
SHI_00003021-RA	7.03673	5.51012	6.63e-18	Up	AT5G62150	peptidoglycan-binding LysM domain-containing protein	AT5G62150
SHI_00019093-RA	6.07905	6.98063	8.37e-18	Up	AT5G05340	Encodes a protein with sequence similarity to peroxidases that is involved in lignin biosynthesis. Loss of function mutations show abnormal development of xylem fibers and reduced levels of lignin biosynthetic enxymes.	PRX52
SHI_00003720-RA	6.39546	2.41108	8.89e-18	Up	AT5G50760	SAUR-like auxin-responsive protein family	SAUR55
SHI_00024031-RA	6.34693	3.72753	9.08e-18	Up	AT4G26790	GDSL-motif esterase/acyltransferase/lipase. Enzyme group with broad substrate specificity that may catalyze acyltransfer or hydrolase reactions with lipid and non-lipid substrates.	AT4G26790
SHI_00005564-RA	5.16262	7.77639	1.18e-17	Up	AT2G36380	pleiotropic drug resistance 6	ABCG34
SHI_00013298-RA	3.57765	7.94396	1.18e-17	Up	AT2G30870	early dehydration-induced gene ERD13 homologous to tobacco and maize glutathione S-transferases. Encodes glutathione transferase belonging to the phi class of GSTs. Naming convention according to Wagner et al. (2002)	GSTF10
SHI_00003641-RA	3.59434	4.99642	1.49e-17	Up	AT1G74030	Encodes the plastid-localized phosphoenolpyruvate enolase. Mutant plants have abnormal trichomes.	ENO1
SHI_00025388-RA	7.29953	3.2923	1.52e-17	Up	AT3G07520	member of Putative ligand-gated ion channel subunit family. Contains a functional cation - permeable pore domain. Involved in cellular cation homeostasis.	GLR1.4
SHI_00009645-RA	3.89098	6.02703	1.78e-17	Up	AT2G38900	Predicted to encode a PR (pathogenesis-related) peptide that belongs to the PR-6 proteinase inhibitor family. Six putative PR-6-type protein encoding genes are found in Arabidopsis: At2g38900, At2g38870, At5g43570, At5g43580, At3g50020 and At3g46860.	AT2G38900
SHI_00010187-RA	4.47276	3.67315	1.86e-17	Up	AT3G60440	Phosphoglycerate mutase family protein	AT3G60440
SHI_00018231-RA	3.57394	4.61974	2.09e-17	Up	AT2G25410	RING/U-box superfamily protein	ATL22
SHI_00020218-RA	5.11539	2.85321	2.13e-17	Up	AT5G57560	Encodes a cell wall-modifying enzyme, rapidly upregulated in response to environmental stimuli.	TCH4
SHI_00024440-RA	4.24775	3.79209	2.26e-17	Up	AT3G55450	PBS1-like 1	PBL1
SHI_00028968-RA	-3.04884	4.63873	2.43e-17	Down	AT1G33240	Encodes a plant transcriptional activator that contains two separate, but similar, trihelix DNA-binding domains, similar to GT-2. Gene is expressed in all aerial parts of the plant, with higher level of expression in siliques. At-GTL2 was thought to be a duplicated copy of this gene but is likely to be a cloning artefact, the result of a chimeric clone. Regulates ploidy-dependent cell growth in t…	GTL1
SHI_00030568-RA	7.26187	9.93186	2.62e-17	Up	AT5G44630	Encodes a sesquiterpene synthase involved in generating all of the group B sesquiterpenes found in the Arabidopsis floral volatile blend. Strongly expressed in intrafloral nectaries.	AT5G44630
SHI_00019961-RA	3.9318	4.06411	2.83e-17	Up	AT5G07390	respiratory burst oxidase homolog A	RBOHA
SHI_00030503-RA	6.82694	7.72362	3.88e-17	Up	AT5G54810	A.thaliana tryptophan synthase beta subunit (trpB)	TSB1
SHI_00005183-RA	3.73977	3.64065	4.22e-17	Up	AT5G02640	hypothetical protein	AT5G02640
SHI_00007110-RA	-3.67787	4.72508	4.55e-17	Down	AT4G37740	Growth regulating factor encoding transcription activator. One of the nine members of a GRF gene family, containing nuclear targeting domain. Mutants result in smaller leaves indicating the role of the gene in leaf development. Expressed in root, shoot and flower	GRF2
SHI_00026936-RA	5.99811	4.13066	4.76e-17	Up	AT3G22160	JAV1 is a repressor of jasmonate-mediated defense responses.	JAV1
SHI_00009085-RA	-3.43375	5.1823	5.18e-17	Down	AT1G06050	ENHANCED DISEASE RESISTANCE-like protein (DUF1336)	AT1G06050
SHI_00002870-RA	2.99397	5.59393	1.08e-16	Up	AT4G33540	metallo-beta-lactamase family protein	AT4G33540
SHI_00007246-RA	4.04715	3.00542	1.14e-16	Up	AT1G55740	seed imbibition 1	SIP1
SHI_00013042-RA	4.32088	3.08665	1.16e-16	Up	AT1G08880	Encodes HTA5, a histone H2A protein. H2AX is a meiosis-specific isoform of histone H2A. Upon DSB formation, rapid accumulation of phosphorylated H2AX (&#947	H2AXA
SHI_00011882-RA	3.01386	5.07312	1.23e-16	Up	AT5G22860	Serine carboxypeptidase S28 family protein	AT5G22860
SHI_00002677-RA	8.46452	4.78156	1.27e-16	Up	AT3G04690	Receptor-like kinase required for maintenance of pollen tube growth. Display polar localization at the plasma membrane of the pollen tube tip.	ANX1
SHI_00029943-RA	3.62515	3.56734	1.31e-16	Up	AT3G11210	SGNH hydrolase-type esterase superfamily protein	AT3G11210
SHI_00009671-RA	2.99929	4.86336	1.33e-16	Up	AT1G20970	calponin-like domain protein	AT1G20970
SHI_00004989-RA	3.50841	4.74497	1.85e-16	Up	AT2G47370	Calcium-dependent phosphotriesterase superfamily protein	AT2G47370
SHI_00003428-RA	6.06555	2.16357	1.92e-16	Up	AT3G11580	SOD7 encodes nuclear localized B3 DNA binding domain and a transcriptional repression motif. Belongs to the RAV gene family. Functions in regulation of seed size and binds to and represses KLU. Transcription repressor involved in regulation of inflorescence architecture.	NGAL2
SHI_00009781-RA	4.18222	5.48965	1.92e-16	Up	AT4G08950	Phosphate-responsive 1 family protein	EXO
SHI_00000584-RA	-2.77991	3.74302	2.02e-16	Down	AT5G45275	Major facilitator superfamily protein	AT5G45275
SHI_00010971-RA	8.5873	7.79607	2.24e-16	Up	AT5G05600	Encodes a protein with similarity to flavonol synthases that is involved in the detoxifcation polycyclic aromatic hydrocarbons.One of 4 paralogs encoding a 2-oxoglutarate/Fe(II)-dependent oxygenases that hydroxylates JA to 12-OH-JA.	JOX2
SHI_00000950-RA	3.07566	6.34808	2.25e-16	Up	AT4G24120	Member of a small family of oligopeptide transporters similar to the yellow stripe locus of maize (ZmYS1).	YSL1
SHI_00003728-RA	3.99536	4.55336	2.26e-16	Up	AT3G02230	RGP1 is a UDP-arabinose mutase that catalyzes the interconversion between the pyranose and furanose forms of UDP-L-arabinose. It appears to be required for proper cell wall formation. rgp1/rgp2 (at5g15650) double mutants have a male gametophyte lethal phenotype. RGP1 fusion proteins can be found in the cytosol and peripherally associated with the Golgi apparatus. The mRNA is cell-to-cell mobile.	RGP1
SHI_00022700-RA	10.1388	4.81642	2.32e-16	Up	AT5G59540	2-oxoglutarate (2OG) and Fe(II)-dependent oxygenase superfamily protein	AT5G59540
SHI_00026797-RA	7.93741	2.527	2.33e-16	Up	AT1G71760	hypothetical protein	AT1G71760
SHI_00000035-RA	-4.53771	3.16361	2.39e-16	Down	AT2G03810	18S pre-ribosomal assembly protein gar2-like protein	AT2G03810
SHI_00001536-RA	9.05051	1.1412	2.39e-16	Up	AT2G24690	Transcriptional factor B3 family protein	AT2G24690
SHI_00024286-RA	5.90824	3.03521	2.56e-16	Up	AT2G38790	hypothetical protein	AT2G38790
SHI_00022298-RA	4.51557	8.11273	3.42e-16	Up	AT5G48230	Encodes an acetoacetyl-CoA thiolase that generates the bulk of the acetoacetyl-CoA precursor needed for the cytosolic localized, mevalonate-derived isoprenoids biosynthetic pathway. Loss-of-function mutants are embryo lethal.	ACAT2
SHI_00007095-RA	-4.0713	3.88488	3.61e-16	Down	AT3G14250	RING/U-box superfamily protein	AT3G14250
SHI_00023146-RA	3.34519	4.83547	4.43e-16	Up	AT4G12350	Encodes a transcriptional regulator that directly activates lignin biosynthesis genes and phenylalanine biosynthesis genes during secondary wall formation.	MYB42
SHI_00001400-RA	3.34931	7.3053	4.63e-16	Up	AT3G06310	Cox19-like CHCH family protein	AT3G06310
SHI_00011409-RA	3.21234	3.37716	5.49e-16	Up	AT5G34930	arogenate dehydrogenase	AT5G34930
SHI_00027945-RA	6.22917	1.82029	5.57e-16	Up	AT1G09090	NADPH-oxidase AtrbohB plays a role in seed after-ripening. Major producer of superoxide in germinating seeds. AtrbohB pre-mRNA is alternatively spliced in seeds in a hormonally and developmentally regulated manner. ABA caused accumulation of AtrbohB-? mRNA and prevented prevented AtrbohB-a mRNA expression in fresh seeds.	RBOHB
SHI_00015279-RA	6.03685	3.18011	8.34e-16	Up	AT1G80690	PPPDE putative thiol peptidase family protein	AT1G80690
SHI_00001451-RA	7.05474	3.14437	8.44e-16	Up	AT4G37440	hypothetical protein	AT4G37440
SHI_00015984-RA	5.47928	1.73689	9.91e-16	Up	AT1G22880	cellulase 5	CEL5
SHI_00030773-RA	-3.93094	5.37664	1.28e-15	Down	AT5G07820	Plant calmodulin-binding protein-like protein	AT5G07820
SHI_00011454-RA	4.95536	4.25338	1.28e-15	Up	AT1G75160	DUF620 family protein (DUF620)	BDR9
SHI_00028443-RA	-3.04531	6.47901	1.63e-15	Down	AT3G56710	Sig1 binding protein	SIB1
SHI_00016631-RA	4.19968	2.95073	1.73e-15	Up	AT4G23290	Encodes a cysteine-rich receptor-like protein kinase.	RECEPTOR-LIKE PROTEIN KINASE
SHI_00010344-RA	7.56698	3.10781	2e-15	Up	AT1G78370	Encodes glutathione transferase belonging to the tau class of GSTs. Naming convention according to Wagner et al. (2002).	GSTU20
SHI_00014879-RA	3.74833	9.33517	2.04e-15	Up	AT1G60810	One of the three genes encoding subunit A of the trimeric enzyme ATP Citrate lyase	ACLA-2
SHI_00027540-RA	4.99242	2.18004	2.1e-15	Up	AT1G68360	Encodes a nuclear localized member of the C2H2 family of TFIIIA transcription factors.GIS3 is involved in trichome initiation and development downstream of GA and cytokinin signaling. GIS regulates the expression GIS and GIS2.	GIS3
SHI_00021232-RA	7.28325	2.39838	2.21e-15	Up	AT3G13784	cell wall invertase 5	CWINV5
SHI_00018754-RA	7.82336	1.68064	2.27e-15	Up	AT3G22600	Glycosylphosphatidylinositol (GPI)-anchored LTPg protein, downregulated in syncytia induced by the beet cyst nematode Heterodera schachtii and root knot nematode Meloidogyne incognita. Infection with bacteria (Pseudomonas syringae) and fungi (Botrytis cinerea) leads to the induction of the gene in leaves.	LTPG5
SHI_00027166-RA	9.00198	9.14187	2.78e-15	Up	AT2G31100	alpha/beta-Hydrolases superfamily protein	AT2G31100
SHI_00022561-RA	6.4228	1.64545	3.04e-15	Up	AT5G43520	Cysteine/Histidine-rich C1 domain family protein	AT5G43520
SHI_00008093-RA	7.39618	3.41518	3.33e-15	Up	AT1G32350	alternative oxidase 1D	AOX1D
SHI_00028634-RA	8.34838	2.24969	3.52e-15	Up	AT2G19550	alpha/beta-Hydrolases superfamily protein	AT2G19550
SHI_00000424-RA	5.25982	3.92699	3.71e-15	Up	AT5G64120	Encodes a cell wall bound peroxidase that is induced by hypo-osmolarity and is involved in the lignification of cell walls.	PRX71
SHI_00002967-RA	5.02507	2.25084	3.86e-15	Up	AT5G24230	Lipase class 3-related protein	AT5G24230
SHI_00013561-RA	5.45701	8.1096	4.26e-15	Up	AT5G55410	Bifunctional inhibitor/lipid-transfer protein/seed storage 2S albumin superfamily protein	AT5G55410
SHI_00015173-RA	-5.04444	5.37353	4.28e-15	Down	AT1G68780	RNI-like superfamily protein	AT1G68780
SHI_00001259-RA	4.47213	3.77359	4.29e-15	Up	AT5G57240	OSBP(oxysterol binding protein)-related protein 4C	OXYSTEROL BINDING PROTEIN
SHI_00014323-RA	3.6721	5.21188	4.36e-15	Up	AT1G35710	kinase family with leucine-rich repeat domain-containing protein	AT1G35710
SHI_00027193-RA	4.76759	7.66399	4.42e-15	Up	AT5G04630	member of CYP77A	CYP77A9
SHI_00006159-RA	4.72478	2.08448	5.03e-15	Up	AT5G24090	Chitinase A (class III) expressed exclusively under environmental stress conditions. Shown be a plant lysozyme involved in plant immunity.	CHIA
SHI_00019609-RA	-6.63674	6.24833	5.03e-15	Down	AT1G66800	Its expression is enriched in non-root hair cells (compared to root hair cells) and this enrichment is associated with increase in the transcription-associated mark trimethylation of H3 lysine 4 (H3K4me3) and decrease in the Polycomb silencing-associated mark trimethylation of H3 lysine 27 (H3K27me3) in non-root hair cells relative to root-hair cells. Protein sequence is similar to Eucalyptus gun…	AT1G66800
SHI_00005401-RA	3.56773	8.97943	5.62e-15	Up	AT5G64260	EXORDIUM like 2	EXL2
SHI_00022047-RA	5.43977	2.79194	5.73e-15	Up	AT4G30280	Encodes a xyloglucan endotransglucosylase/hydrolase with only only the endotransglucosylase (XET	XTH18
SHI_00025337-RA	4.93164	4.03356	5.85e-15	Up	AT4G35070	SBP (S-ribonuclease binding protein) family protein	AT4G35070
SHI_00012869-RA	6.90863	5.96011	5.85e-15	Up	AT4G37970	cinnamyl alcohol dehydrogenase 6	CAD6
SHI_00022032-RA	3.8015	5.84444	6.07e-15	Up	AT1G04110	Initially identified as a mutation affecting stomatal development and distribution. Encodes a protein similar to serine proteases.	SDD1
SHI_00011476-RA	-2.51107	5.24505	6.98e-15	Down	AT3G12560	Encodes a telomeric DNA-binding protein.	TRFL9
SHI_00019336-RA	5.95297	5.26785	7.19e-15	Up	AT1G48820	Terpenoid cyclases/Protein prenyltransferases superfamily protein	AT1G48820
SHI_00015904-RA	-3.95269	3.9191	7.25e-15	Down	AT1G71970	hypothetical protein	AT1G71970
SHI_00023408-RA	6.69193	1.36393	7.42e-15	Up	AT3G06490	Encodes a MYB transcription factor involved in regulating anther dehiscence as well as regulating cell death, and cuticle-related Botrytis immunity.	MYB108
SHI_00021634-RA	-3.52082	3.22228	7.42e-15	Down	AT2G41860	member of Calcium Dependent Protein Kinase	CPK14
SHI_00007314-RA	4.26476	4.59902	1.08e-14	Up	AT1G13100	putative cytochrome P450	CYP71B29
SHI_00029841-RA	7.61865	3.4642	1.11e-14	Up	AT1G17540	kinase with adenine nucleotide alpha hydrolases-like domain-containing protein	AT1G17540
SHI_00019017-RA	-3.08457	5.25429	1.4e-14	Down	AT2G15580	RING/U-box superfamily protein	AT2G15580
SHI_00028291-RA	7.68821	4.51891	1.92e-14	Up	AT1G21850	SKU5 similar 8	SKS8
SHI_00030824-RA	3.3404	4.83328	1.94e-14	Up	AT5G19550	Nitrogen metabolism. Major cytosolic isoenzyme controlling aspartate biosynthesis in the light. The mRNA is cell-to-cell mobile.	ASP2
SHI_00008289-RA	8.56568	0.676822	2.21e-14	Up	AT2G17430	A member of a large family of seven-transmembrane domain proteins specific to plants, homologs of the barley mildew resistance locus o (MLO) protein. Controls pollen tube reception in synergids. The Arabidopsis genome contains 15 genes encoding MLO proteins, with localization in plasma membrane. Phylogenetic analysis revealed four clades of closely-related AtMLO genes. ATMLO7 belongs to the clade…	MLO7
SHI_00000484-RA	4.87011	8.57258	2.38e-14	Up	AT5G10830	S-adenosyl-L-methionine-dependent methyltransferases superfamily protein	AT5G10830
SHI_00028629-RA	5.95647	4.50234	2.42e-14	Up	AT3G53730	Histone superfamily protein	AT3G53730
SHI_00013804-RA	4.20936	8.46989	3.17e-14	Up	AT3G53260	Encodes phenylalanine lyase. Arabidopsis has four PALs: AT2G37040 (PAL1), AT3G53260 (PAL2), AT5G04230 (PAL3) and AT3G10340 (PAL4).	PAL2
SHI_00004752-RA	9.67645	4.74135	3.35e-14	Up	AT5G04330	Cytochrome P450 superfamily protein	CYP84A4
SHI_00000710-RA	3.49334	2.49406	3.64e-14	Up	AT5G41610	member of Putative Na+/H+ antiporter family	CHX18
SHI_00008255-RA	4.45172	5.48219	3.67e-14	Up	AT2G44010	hypothetical protein	AT2G44010
SHI_00006148-RA	8.33645	3.41602	3.94e-14	Up	AT5G24030	Encodes a protein with ten predicted transmembrane helices. The SLAH3 protein has similarity to the SLAC1 protein involved in ion homeostasis in guard cells. Although it is not expressed in guard cells, it can complement an slac1-2 mutant suggesting that it performs a similar function. SLAH3:GFP localizes to the plasma membrane.	SLAH3
SHI_00010314-RA	2.93761	4.21697	3.96e-14	Up	AT2G28890	Encodes a protein phosphatase 2C like gene, similar to POL. Involved in leaf development. Knockout mutants have abnormally shaped leaves.	PLL4
SHI_00014042-RA	4.52145	4.76737	4.23e-14	Up	AT1G56250	Encodes an F-box protein that can functionally replace VirF, regulating levels of the VirE2 and VIP1 proteins via a VBF-containing SCF complex. It is thought to be involved in DNA integration and T-DNA degradation.	PP2-B14
SHI_00017326-RA	3.11139	2.93762	4.43e-14	Up	AT3G51220	WEB family protein (DUF827)	AT3G51220
SHI_00016416-RA	3.0852	5.78612	4.79e-14	Up	AT3G06350	Encodes a bi-functional dehydroquinate-shikimate dehydrogenase enzyme that catalyzes two steps in the chorismate biosynthesis pathway.	MEE32
SHI_00021519-RA	6.1924	5.58261	5.1e-14	Up	AT5G13750	zinc induced facilitator-like 1	ZIFL1
SHI_00003865-RA	4.22988	7.03123	5.91e-14	Up	AT5G36970	NDR1/HIN1-like protein, expression induced during incompatible response to a pathogen, expression is at least partly dependent on the salicylic acid signaling pathway	NHL25
SHI_00022549-RA	5.24176	2.67236	6.36e-14	Up	AT2G44380	Cysteine/Histidine-rich C1 domain family protein	AT2G44380
SHI_00009255-RA	6.24791	4.21859	6.46e-14	Up	AT5G07310	encodes a member of the ERF (ethylene response factor) subfamily B-4 of ERF/AP2 transcription factor family. The protein contains one AP2 domain. There are 7 members in this subfamily.	ERF115
SHI_00004710-RA	4.20314	5.56884	6.61e-14	Up	AT2G18170	MAP kinase 7	MPK7
SHI_00002850-RA	4.6403	4.6841	7.79e-14	Up	AT5G13400	Major facilitator superfamily protein	AT5G13400
SHI_00012629-RA	3.93178	10.1908	7.93e-14	Up	AT4G15630	Uncharacterized protein family (UPF0497)	CASPL1E1
SHI_00006951-RA	-3.12616	5.42476	8.29e-14	Down	AT2G23970	Class I glutamine amidotransferase-like superfamily protein	AT2G23970
SHI_00006875-RA	3.66854	4.21258	8.69e-14	Up	AT5G15500	Ankyrin repeat family protein	AT5G15500
SHI_00009485-RA	5.02796	2.62065	9.35e-14	Up	AT3G28860	Encodes a member of the ATP-binding cassette (ABC) transporter family that is involved in auxin transport and is involved in postembryonic organ separation. Also known as AtMDR11 and PGP19. Possibly regulates auxin-dependent responses by influencing basipetal auxin transport in the root. Acts upstream of phyA in regulating hypocotyl elongation and gravitropic response. Exerts nonredundant, partia…	ABCB19
SHI_00000949-RA	6.96242	4.1341	1.2e-13	Up	AT4G24110	NADP-specific glutamate dehydrogenase	AT4G24110
SHI_00007252-RA	-2.15064	5.05271	1.5e-13	Down	AT1G55760	Expression induced under NaCl, mannitol, ABA and indole-3-acetic acid (IAA) treatment.	SIBP1
SHI_00010714-RA	2.76959	5.59374	1.55e-13	Up	AT2G36970	UDP-Glycosyltransferase superfamily protein	AT2G36970
SHI_00010133-RA	2.46401	5.67328	1.55e-13	Up	AT3G23240	encodes a member of the ERF (ethylene response factor) subfamily B-3 of ERF/AP2 transcription factor family (ERF1). The protein contains one AP2 domain. There are 18 members in this subfamily including ATERF-1, ATERF-2, AND ATERF-5. EREBP like protein that binds GCC box of ethylene regulated promoters such as basic chitinases. Constitutive expression of ERF1 phenocopies ethylene over production. …	ERF1
SHI_00004820-RA	-3.46209	4.17579	1.61e-13	Down	AT5G10100	Trehalose-6-phosphate phosphatase which enhances drought tolerance by regulating stomatal apertures.	TPPI
SHI_00011770-RA	4.01726	7.20039	1.67e-13	Up	AT3G18830	This gene encodes a plasma membrane-localized polyol/cyclitol/monosaccharide-H+-symporter. The symporter is able to catalyze the energy-dependent membrane passage of a wide range of linear polyols (three to six carbon backbone), of cyclic polyols (<i>myo</i>-inositol), and of numerous monosaccharides, including pyranose ring-forming and furanose ring-forming hexoses and pentoses. This gene belong…	PMT5
SHI_00010825-RA	4.26529	5.48535	1.68e-13	Up	AT2G36190	cwINV4 appears to function as a cell wall-localized invertase (that can catalyze the hydrolysis of sucrose into fructose and glucose) based on the phenotype of cwinv4 mutants. cwINV4 transcripts are expressed at high levels in lateral and median nectaries and this enzyme plays an important role in nectar production.	CWINV4
SHI_00000659-RA	-2.69642	5.33749	1.69e-13	Down	AT4G23980	Encodes auxin response factor 9 (ARF9). The mRNA is cell-to-cell mobile.	ARF9
SHI_00005576-RA	4.96972	3.04342	1.73e-13	Up	AT2G27690	Encodes a CYP94C1. Has highest omega-hydroxylase activity with 9,10-epoxystearic acid, while also metabolized lauric acid (C12:0) and C18 unsaturated fatty acids. Gene expression is induced in response to wounding and jasmonic acid treatment.	CYP94C1
SHI_00003885-RA	6.88907	6.74271	1.79e-13	Up	AT2G02010	glutamate decarboxylase 4	GAD4
SHI_00019282-RA	2.95289	6.21533	1.84e-13	Up	AT4G24240	Encodes a Ca-dependent calmodulin binding protein. Sequence similarity to the WRKY transcription factor gene family.	WRKY7
SHI_00009513-RA	3.17983	7.20524	1.95e-13	Up	AT5G54160	A caffeic acid/5-hydroxyferulic acid O-methyltransferase. Interacts with 14-4-3 proteins in yeast 2 hybrid assay. AtOMT1 (At5g54160) encodes a flavonol 3?-O-methyltransferase that is highly active towards quercetin and myricetin. The substrate specificity identifies the enzyme as flavonol 3?-methyltransferase which replaces the former annotation of the gene to encode a caffeic acid/5-hydroxyferul…	OMT1
SHI_00000236-RA	6.99306	2.76399	2.15e-13	Up	AT2G22560	Kinase interacting (KIP1-like) family protein	NET2D
SHI_00003544-RA	3.49497	3.06691	2.16e-13	Up	AT2G44490	Encodes a glycosyl hydrolase that localizes to peroxisomes and acts as a component of an inducible preinvasion resistance mechanism. Required for mlo resistance. The mRNA is cell-to-cell mobile.	PEN2
SHI_00013957-RA	2.81574	6.88049	2.24e-13	Up	AT3G05200	Encodes a putative RING-H2 zinc finger protein ATL6 (ATL6). The mRNA is cell-to-cell mobile.	ATL6
SHI_00007732-RA	6.24997	2.53488	2.24e-13	Up	AT1G68390	Core-2/I-branching beta-1,6-N-acetylglucosaminyltransferase family protein	AT1G68390
SHI_00005090-RA	3.76928	6.62353	2.49e-13	Up	AT5G22580	Stress responsive A/B Barrel Domain-containing protein	AT5G22580
SHI_00014275-RA	3.47244	5.55562	2.53e-13	Up	AT4G13180	NAD(P)-binding Rossmann-fold superfamily protein	AT4G13180
SHI_00005714-RA	4.06167	4.9232	2.65e-13	Up	AT3G27880	hypothetical protein (DUF1645)	AT3G27880
SHI_00017693-RA	-3.41734	4.80518	2.87e-13	Down	AT5G59000	RING/FYVE/PHD zinc finger superfamily protein	AT5G59000
SHI_00003762-RA	-3.71365	6.4362	3.24e-13	Down	AT5G16030	mental retardation GTPase activating protein	AT5G16030
SHI_00021090-RA	5.9145	2.42001	3.39e-13	Up	AT5G20480	Encodes a predicted leucine-rich repeat receptor kinase (LRR-RLK). Functions as the receptor for bacterial PAMP (pathogen associated molecular patterns) EF-Tu.	EFR
SHI_00020966-RA	2.60193	3.77571	3.59e-13	Up	AT4G38070	transcription factor bHLH131-like protein	AT4G38070
SHI_00028295-RA	2.77988	5.48597	3.84e-13	Up	AT3G45970	member of EXPANSIN-LIKE. Naming convention from the Expansin Working Group (Kende et al, 2004. Plant Mol Bio) The mRNA is cell-to-cell mobile.	EXLA1
SHI_00007488-RA	5.38536	8.16007	4.03e-13	Up	AT1G64660	Encodes a functional methionine gamma-lyase, a cytosolic enzyme catalyzes the degradation of methionine into methanethiol, alpha-ketobutyrate and ammonia. The catabolism of excess methionine is important to methionine homeostasis. The mRNA is cell-to-cell mobile.	MGL
SHI_00022227-RA	5.71576	1.78629	4.76e-13	Up	AT3G09110	hypothetical protein (DUF674)	AT3G09110
SHI_00001621-RA	3.89666	2.44731	4.76e-13	Up	AT2G24600	Ankyrin repeat family protein	AT2G24600
SHI_00011024-RA	5.47108	3.39905	5.02e-13	Up	AT3G51710	D-mannose binding lectin protein with Apple-like carbohydrate-binding domain-containing protein	AT3G51710
SHI_00025626-RA	5.67338	3.45677	5.06e-13	Up	AT5G57260	putative cytochrome P450	CYP71B10
SHI_00018818-RA	3.25582	8.06346	5.35e-13	Up	AT4G08870	Encodes one of the two arginase in the genome. Gene expression is enhanced by methyl jasmonate treatment. It is involved in the defense response to B.cinerea.	ARGAH2
SHI_00015602-RA	2.55245	5.96152	5.54e-13	Up	AT3G17980	Calcium-dependent lipid-binding (CaLB domain) family protein	C2
SHI_00021862-RA	5.59227	3.75613	5.61e-13	Up	AT1G29290	B-cell lymphoma 6 protein	AT1G29290
SHI_00012112-RA	-4.85635	3.40672	5.81e-13	Down	AT1G77280	kinase with adenine nucleotide alpha hydrolases-like domain-containing protein	AT1G77280
SHI_00010686-RA	2.88119	4.66309	5.91e-13	Up	AT5G60670	Ribosomal protein L11 family protein	RPL12C
SHI_00009767-RA	4.84642	1.92875	6.04e-13	Up	AT1G78130	Major facilitator superfamily protein	UNE2
SHI_00006549-RA	-2.52573	4.76805	6.61e-13	Down	AT4G26080	Involved in abscisic acid (ABA) signal transduction. Negative regulator of ABA promotion of stomatal closure.	ABI1
SHI_00020524-RA	-5.88285	5.29332	8.11e-13	Down	AT4G08300	nodulin MtN21-like transporter family protein	UMAMIT17
SHI_00000233-RA	5.59792	1.85067	8.11e-13	Up	AT3G54990	Encodes a AP2 domain transcription factor that can repress flowering. SMZ and its paralogous gene, SNARCHZAPFEN (SNZ), share a signature with partial complementarity to the miR172 microRNA, whose precursor is induced upon flowering.	SMZ
SHI_00014804-RA	8.51191	0.638883	8.79e-13	Up	AT3G05920	Heavy metal transport/detoxification superfamily protein	AT3G05920
SHI_00010948-RA	4.8585	1.66369	9.51e-13	Up	AT3G45710	Encodes a chloride permeable transporter. Modulates chloride efflux from roots.	NPF2.5
SHI_00028565-RA	2.93253	6.82434	9.55e-13	Up	AT5G20230	Encodes a Al-stress-induced gene. Along with TCF, it promotes lignin biosynthesis in response to cold stress. The mRNA is cell-to-cell mobile.	BCB
SHI_00017749-RA	6.15521	3.32223	1.05e-12	Up	AT3G46520	Member of actin subclass composed of ACT12 and ACT4. RNA is expressed at very low levels in vegetative organs, low levels in flowers and very high levels in pollen. Expression of an ACT12/GUS fusion was found in vascular tissues, tapetum, developing and mature pollen, the root cap and in a ring of pericycle tissues during lateral root initiation and early development.	ACT12
SHI_00012155-RA	-3.13566	3.74852	1.06e-12	Down	AT5G48940	RGFR2 is a leucine--rich repeat receptor kinase that, together with RGFR1 and RGFR3, binds ROOT GROWTH FACTORS and is required for establishing the gradient of PLETHORA1 and PLETHORA2 essential for proper root growth and development.	RGFR2
SHI_00012243-RA	5.07324	4.1224	1.08e-12	Up	AT3G08870	Concanavalin A-like lectin protein kinase family protein	LECRK-VI.1
SHI_00028648-RA	5.33813	1.18494	1.23e-12	Up	AT4G08040	encodes an aminotransferase that belongs to ACC synthase gene family structurally	ACS11
SHI_00018623-RA	5.55656	2.04638	1.23e-12	Up	AT5G49150	Encodes a transmembrane domain containing protein expressed in sperm cells. Target promoter of the male germline-specific transcription factor DUO1.	GEX2
SHI_00024946-RA	7.45856	2.10321	1.26e-12	Up	AT1G18790	RWP-RK domain-containing protein	RKD1
SHI_00026549-RA	-2.83904	6.88752	1.34e-12	Down	AT1G10400	UDP-Glycosyltransferase superfamily protein	AT1G10400
SHI_00001153-RA	-2.00344	5.28433	1.39e-12	Down	AT1G71000	Chaperone DnaJ-domain superfamily protein	AT1G71000
SHI_00019863-RA	6.96879	7.37479	1.44e-12	Up	AT4G35180	LYS/HIS transporter 7	LHT7
SHI_00000500-RA	7.15332	2.22125	1.55e-12	Up	AT2G41810	imidazolonepropionase (Protein of unknown function, DUF642)	AT2G41810
SHI_00004397-RA	5.94353	1.78376	1.67e-12	Up	AT5G35700	Encodes FIMBRIN5, an actin bundling factor required for pollen germination and pollen tube growth. Different members of the fimbrin/plastin family have diverged biochemically during evolution to generate either tight actin bundles or loose networks with distinct biochemical and biophysical properties. FIM4 generates both actin bundles and branched actin filaments whereas FIM5 only generates actin…	FIM5
SHI_00021716-RA	7.07852	3.5488	1.72e-12	Up	AT1G80110	phloem protein 2-B11	PP2-B11
SHI_00028149-RA	2.79939	5.14055	1.72e-12	Up	AT2G16430	Encodes an acid phosphatase involved plant acclimation to Pi deprivation.	PAP10
SHI_00028787-RA	3.35028	4.22297	1.84e-12	Up	AT5G12170	Encodes one of the CRT-Like transporters (CLT1/AT5G19380, CLT2/AT4G24460, CLT3/AT5G12170). Required for glutathione homeostasis and stress responses. Mutants lacking these transporters are heavy metal-sensitive, glutathione(GSH)-deficient, and hypersensitive to Phytophthora infection. The mRNA is cell-to-cell mobile.	CHLOROQUINE-RESISTANCE TRANSPORTER
SHI_00001693-RA	-3.51033	4.38149	1.85e-12	Down	AT4G31820	A member of the NPY family genes (NPY1/AT4G31820, NPY2/AT2G14820, NPY3/AT5G67440, NPY4/AT2G23050, NPY5/AT4G37590). Encodes a protein with similarity to NHP3. Contains BTB/POZ domain. Promoter region has canonical auxin response element binding site and Wus binding site. Co-localizes to the late endosome with PID. Regulates cotyledon development through control of PIN1 polarity in concert with PID…	ENP
SHI_00019338-RA	-4.0339	3.12925	1.88e-12	Down	AT5G10570	Encodes a myo-inositol hexakisphosphate kinase.	ATVIP2
SHI_00016348-RA	2.42739	6.87761	2.14e-12	Up	AT5G49460	One of the two genes encoding subunit B of the cytosolic enzyme ATP Citrate Lyase (ACL)	ACLB-2
SHI_00011853-RA	3.03526	4.31986	2.16e-12	Up	AT1G61560	A member of a large family of seven-transmembrane domain proteins specific to plants, homologs of the barley mildew resistance locus o (MLO) protein. The Arabidopsis genome contains 15 genes encoding MLO proteins, with localization in plasma membrane. Phylogenetic analysis revealed four clades of closely-related AtMLO genes. ATMLO6 belongs to the clade IV, with AtMLO2, AtMLO3 and AtMLO12. The gen…	MLO6
SHI_00022461-RA	-3.89994	3.92283	2.29e-12	Down	AT4G08700	Member of a family of proteins related to PUP1, a purine transporter. May be involved in the transport of purine and purine derivatives such as cytokinins, across the plasma membrane.	PUP13
SHI_00018156-RA	5.41044	7.1218	2.33e-12	Up	AT4G29930	basic helix-loop-helix (bHLH) DNA-binding superfamily protein	AT4G29930
SHI_00005636-RA	3.55833	4.4612	2.75e-12	Up	AT4G15670	Encodes a member of the CC-type glutaredoxin (ROXY) family.	GRXS7
SHI_00028316-RA	-2.66431	3.58509	2.79e-12	Down	AT4G35420	Encodes DRL1 (Dihydroflavonol 4-reductase-like1), a closely related homolog of the rice anther-specific gene OsDFR2. DRL1 may be involved in a metabolic pathway essential for pollen wall development and male fertility. Mutant plants have impaired pollen formation and seed production.	DRL1
SHI_00006871-RA	4.50295	2.72359	2.79e-12	Up	AT4G11300	ROH1, putative (DUF793)	AT4G11300
SHI_00016059-RA	2.75541	5.57459	2.79e-12	Up	AT2G01170	Encodes a bidirectional amino acid transporter that can transport ala, arg, glu and lys, GABA but not pro with both export and import activity. Its expression is localized in the vascular tissues suggesting a function in amino acids export from the phloem into sink tissue.	BAT1
SHI_00013392-RA	3.88265	4.17116	2.79e-12	Up	AT5G51060	RHD2 (along with RHD3 and RHD4) is required for normal root hair elongation. Has NADPH oxidase activity. Gene is expressed in the elongation and differention zone in trichoblasts and elongating root hairs. RDH2 is localized to the growing tips of root hair cells. It is required for the production of reactive oxygen species in response to extracellular ATP stimulus. The increase in ROS production …	RHD2
SHI_00010166-RA	3.8833	3.02441	2.86e-12	Up	AT3G18773	RING/U-box superfamily protein	ATL77
SHI_00018448-RA	6.6395	2.74547	3.25e-12	Up	AT4G03500	Ankyrin repeat family protein	AT4G03500
SHI_00005429-RA	-4.46239	4.66697	3.25e-12	Down	AT1G77100	peroxidase superfamily protein	AT1G77100
SHI_00029029-RA	-2.74128	3.34348	3.25e-12	Down	AT1G19200	cyclin-dependent kinase, putative (DUF581)	AT1G19200
SHI_00003045-RA	2.40566	5.59191	3.25e-12	Up	AT1G60440	The gene AT1G60440 encodes pantothenate kinase 1. Its molecular function was shown to phosphorylate pantothenate to form 4?-phosphopantothenate.	PANK1
SHI_00014711-RA	2.95879	3.2542	3.44e-12	Up	AT5G24655	response to low sulfur 4	LSU4
SHI_00005918-RA	-2.62048	5.02258	3.44e-12	Down	AT3G49260	IQ-domain 21	IQD21
SHI_00013575-RA	2.60168	5.3035	3.5e-12	Up	AT3G09030	EAP3 is a cytolsolic BTB/POZ-domain protein involved in trafficking of PEN3.	EAP3
SHI_00016792-RA	12.5508	4.57947	3.57e-12	Up	AT3G01420	Encodes an alpha-dioxygenase involved in protection against oxidative stress and cell death. Induced in response to Salicylic acid and oxidative stress. Independent of NPR1 in induction by salicylic acid. The mRNA is cell-to-cell mobile.	DOX1
SHI_00014370-RA	-3.14033	3.16219	3.74e-12	Down	AT2G32010	Encodes an inositol polyphosphate 5?-phosphatase (5PTase). Mediating phosphoinositide signaling. Involved in establishment of foliar vein patterns.	CVL1
SHI_00021598-RA	4.18892	2.6052	3.77e-12	Up	AT5G59530	2-oxoglutarate (2OG) and Fe(II)-dependent oxygenase superfamily protein	AT5G59530
SHI_00001167-RA	3.30352	2.44471	3.88e-12	Up	AT1G69170	Encodes SPL6. Required for the resistance mediated by the TIR-NB-LRR RPS4 against Pseudomonas syringae carrying the avrRps4 effector. Transcriptome analysis indicates that SPL6 positively regulates a subset of defense genes.	SBP
SHI_00015695-RA	5.68704	0.919065	4.14e-12	Up	AT4G25980	peroxidase superfamily protein	AT4G25980
SHI_00005836-RA	2.04882	5.05545	4.35e-12	Up	AT1G11310	A member of a large family of seven-transmembrane domain proteins specific to plants, homologs of the barley mildew resistance locus o (MLO) protein. The Arabidopsis genome contains 15 genes encoding MLO proteins, with localization in plasma membrane. Phylogenetic analysis revealed four clades of closely-related AtMLO genes. ATMLO2 belongs to the clade IV, with AtMLO3, AtMLO6 and AtMLO12. The gen…	MLO2
SHI_00019866-RA	3.46491	6.93928	4.78e-12	Up	AT2G17120	Induction of chitin-responsive genes by chitin treatment is not blocked in the mutant. It contains a C-terminal GPI anchor signal and is an ortholog of OsCEBiP.	LYP1
SHI_00001392-RA	2.30217	4.70121	4.94e-12	Up	AT3G52290	Member of IQ67 (CaM binding) domain containing family.	IQD3
SHI_00004280-RA	5.91414	1.09066	5.06e-12	Up	AT5G54010	Encodes a flavonoid 3-O-glucoside:2&#8243	UGT79B6
SHI_00023970-RA	2.98895	4.12186	5.06e-12	Up	AT3G20660	organic cation/carnitine transporter4	45203
SHI_00002063-RA	-2.73916	5.84885	5.62e-12	Down	AT4G33240	Encodes a protein that is predicted to act as a 1-phosphatidylinositol-3-phosphate (PtdIns3P) 5-kinase based on its homology to Fab1 from yeast. It contains an FYVE domain required for binding to PtdIns3P-containing membranes in yeast, as well as a Cpn60_TCP1 homology domain plus a kinase domain. fab1a/fab1b pollen grains not viable and have defective vacuolar organization. FAB1A and FAB1B comple…	FAB1A
SHI_00026274-RA	5.36931	5.1714	5.68e-12	Up	AT3G07900	O-fucosyltransferase family protein	AT3G07900
SHI_00021817-RA	5.41755	3.73998	6.02e-12	Up	AT4G27030	Encodes an unusual palmitate desaturase that is highly substrate specific. It introduces a delta-3 trans double bond at palmitate at the sn-2 position of phosphatidylglycerol. The mRNA is cell-to-cell mobile.	FADA
SHI_00030526-RA	8.69754	2.51245	6.08e-12	Up	AT4G27310	Encodes a B-box domain protein that negatively regulates photomorphogenic development by interfering with the binding of the transcription factor HY5 to target gene promoters. Degradation of BBX28 in darkness is dependent on COP1 and occurs via the 26S proteasome pathway. BBX28 acts as a key factor in the COP1-HY5 regulatory hub by maintaining proper HY5 activity to ensure normal photomorphogenic…	BBX28
SHI_00008369-RA	5.87275	3.99719	6.25e-12	Up	AT5G51330	Encodes novel protein involved in sister chromatid cohesion and meiotic chromosome organization during both male and female meiosis. Gene has two alternate transcripts which produce two similar proteins, one 57 aa shorter than the other.	SWI1
SHI_00000281-RA	7.1385	1.80883	6.51e-12	Up	AT5G64990	RAB GTPase homolog H1A	RABH1A
SHI_00014429-RA	2.17299	6.4931	6.64e-12	Up	AT1G02830	Ribosomal L22e protein family	AT1G02830
SHI_00013680-RA	-3.13942	5.07869	7.14e-12	Down	AT2G01820	Leucine-rich repeat protein kinase family protein	AT2G01820
SHI_00020945-RA	6.62117	3.45361	7.14e-12	Up	AT1G32490	Encodes a homolog of the yeast PRP2 protein, one of four related DEAH RNA helicases identified as essential cofactors for RNA splicing. Involved in ABI4-regulated ABA signaling under high glucose condition in early seedling growth.	ESP3
SHI_00002828-RA	5.85283	5.62805	7.16e-12	Up	AT5G13220	Encodes JAZ10, a member of the JASMONATE ZIM-domain (JAZ) proteins acting as repressors of jasmonate (JA) signaling. An alternatively spliced form (JAZ10.4) of JAZ10 lacks the Jas domain.	JAZ10
SHI_00030525-RA	3.75225	4.11662	7.43e-12	Up	AT4G11470	Encodes a cysteine-rich receptor-like protein kinase.	RECEPTOR-LIKE PROTEIN KINASE
SHI_00010539-RA	2.44501	6.04605	7.61e-12	Up	AT5G27450	Encodes a protein with mevalonate kinase activity involved in the mevalonate pathway.	MK
SHI_00022794-RA	-3.20169	3.83052	7.75e-12	Down	AT3G24800	Contains two ring finger domains and one ZZ domain. Weak similarity to yeast Rad18p. Putative component of the N-end rule pathway (ubiquitin-dependent proteolysis) that is involved in the response to pathogens.	PRT1
SHI_00027896-RA	-2.55281	5.86954	7.8e-12	Down	AT2G18300	basic helix-loop-helix (bHLH) DNA-binding superfamily protein	HBI1
SHI_00027174-RA	5.32529	3.3107	7.91e-12	Up	AT3G14650	putative cytochrome P450 The mRNA is cell-to-cell mobile.	CYP72A11
SHI_00028195-RA	-5.01876	3.19714	8.25e-12	Down	AT5G10990	SAUR-like auxin-responsive protein family	SAUR69
SHI_00024055-RA	2.27443	6.84016	8.97e-12	Up	AT1G28380	This gene is predicted to encode a protein involved in negatively regulating salicylic acid-related defense responses and cell death programs. nsl1 mutants develop necrotic lesions spontaneously and show other features of a defense response, such as higher levels of SA and disease resistance-related transcripts, in the absence of a biotic stimulus. The NSL1 protein is predicted to have a MACPF do…	NSL1
SHI_00020810-RA	4.5301	4.04086	9.41e-12	Up	AT3G58770	hypothetical protein	AT3G58770
SHI_00024591-RA	-3.27026	8.16621	9.41e-12	Down	AT2G40610	member of Alpha-Expansin Gene Family. Naming convention from the Expansin Working Group (Kende et al, 2004. Plant Mol Bio). Involved in the formation of nematode-induced syncytia in roots of Arabidopsis thaliana.	EXPA8
SHI_00016893-RA	2.29327	6.39924	9.6e-12	Up	AT5G64140	Encodes a putative ribosomal protein S28.	RPS28
SHI_00030136-RA	3.25999	8.39748	9.87e-12	Up	AT3G02780	Encodes a protein with isopentenyl diphosphate:dimethylallyl diphosphate isomerase activity. There is genetic evidence that it functions in the mevalonate, but not the MEP biosynthetic pathway.	IPP2
SHI_00028358-RA	-4.25437	3.66271	1.4e-11	Down	AT5G06700	Encodes a member of the TBL (TRICHOME BIREFRINGENCE-LIKE) gene family containing a plant-specific DUF231 (domain of unknown function) domain. TBL gene family has 46 members, two of which (TBR/AT5G06700 and TBL3/AT5G01360) have been shown to be involved in the synthesis and deposition of secondary wall cellulose, presumably by influencing the esterification state of pectic polymers. A nomenclature…	TBR
SHI_00017927-RA	4.80584	6.76121	1.48e-11	Up	AT1G52190	Encodes a low affinity nitrate transporter that is expressed in the plasma membrane and found in the phloem of the major veins of leaves. It is responsible for nitrate redistribution to young leaves.	NPF1.2
SHI_00013597-RA	-3.16856	4.0994	1.49e-11	Down	AT3G53950	glyoxal oxidase-related protein	AT3G53950
SHI_00004555-RA	4.0825	5.7573	1.51e-11	Up	AT4G21750	Encodes a homeobox protein similar to GL2. It is expressed in both the apical and basal daughter cells of the zygote as well as their progeny. Expression is detected starting the two-celled stage of embryo development and is later restricted to the outermost, epidermal cell layer from its inception. Its promoter is highly modular with each region contributing to specific aspects of the gene's spa…	ATML1
SHI_00015755-RA	5.4177	1.25878	1.51e-11	Up	AT1G77390	Encodes a core cell cycle gene involved in meiosis II during microsporogenesis. Recessive mutants exhibit delayed and asynchronous meiosis in pollen mother cell populations and uncoordinated nuclear division and cytokinesis resulting in dyad microspores.	CYCA1;2
SHI_00029459-RA	2.08634	5.89532	1.52e-11	Up	AT2G39390	Ribosomal L29 family protein	AT2G39390
SHI_00016724-RA	3.07749	4.45999	1.53e-11	Up	AT5G15140	Galactose mutarotase-like superfamily protein	PEG9
SHI_00005434-RA	7.09361	1.03431	1.83e-11	Up	AT1G01070	Encodes a plasma membrane-localized amino acid transporter likely involved in amino acid export in the developing seed.	UMAMIT28
SHI_00011504-RA	-3.2172	6.25397	1.84e-11	Down	AT5G10770	Eukaryotic aspartyl protease family protein	AT5G10770
SHI_00028355-RA	2.04812	5.31126	1.89e-11	Up	AT1G57860	Translation protein SH3-like family protein	AT1G57860
SHI_00016334-RA	4.00909	3.55567	1.97e-11	Up	AT2G47190	Encodes a MYB transcription factor that possesses an R2R3 MYB DNA binding domain and is known to regulate the expression of salt- and dehydration-responsive genes. Has been shown to bind calmodulin.	MYB2
SHI_00020867-RA	4.49286	5.00793	1.97e-11	Up	AT1G28480	Encodes GRX480, a member of the glutaredoxin family that regulates protein redox state. GRX480 interacts with TGA factors and suppresses JA-responsive PDF1.2 transcription. GRX480 transcription is SA-inducible and requires NPR1. Maybe involved in SA/JA cross-talk. It has also been shown to interact with the transcription factor TGA2 and suppress ORA59 promoter activity.	GRX480
SHI_00020396-RA	3.07302	2.66758	2.01e-11	Up	AT5G56890	Protein kinase superfamily protein	AT5G56890
SHI_00025405-RA	-2.27794	5.17833	2.01e-11	Down	AT1G07350	Encodes a serine/arginine rich-like protein, SR45a. Involved in the regulation of stress-responsive alternative splicing.	SR45A
SHI_00026892-RA	2.7886	4.83435	2.08e-11	Up	AT3G13222	Encodes a protein that binds to G-box binding transcription factors and enhances their binding affinities to G-box in vitro. This protein localizes to the nucleus and is expressed predominantly in the root.	GIP1
SHI_00018287-RA	-5.39395	4.05969	2.08e-11	Down	AT1G62520	sulfated surface-like glycoprotein	AT1G62520
SHI_00022537-RA	6.41398	1.65022	2.08e-11	Up	AT1G05575	transmembrane protein	AT1G05575
SHI_00015383-RA	-3.11359	5.72129	2.11e-11	Down	AT1G64980	Encodes a putative nucleotide-diphospho-sugar transferase required for pollen germination and tube growth.	CDI
SHI_00026871-RA	4.98995	6.80992	2.22e-11	Up	AT5G47530	Auxin-responsive family protein	AT5G47530
SHI_00013970-RA	2.47433	8.26306	2.47e-11	Up	AT4G24330	hypothetical protein (DUF1682)	AT4G24330
SHI_00011078-RA	-2.47494	5.1379	2.6e-11	Down	AT3G06620	PAS domain-containing protein tyrosine kinase family protein	AT3G06620
SHI_00013700-RA	-4.07098	5.69545	2.93e-11	Down	AT5G18240	Encodes MYR1 (MYR1).	MYR1
SHI_00014916-RA	7.47705	5.33425	3.06e-11	Up	AT1G24000	Polyketide cyclase/dehydrase and lipid transport superfamily protein	AT1G24000
SHI_00024464-RA	3.80955	3.12197	3.13e-11	Up	AT5G02190	encodes an aspartic protease, has an important role in determining cell fate during embryonic development and in reproduction processes. The loss-of-function mutation of PCS1 causes degeneration of both male and female gametophytes and excessive cell death of developing embryos during torpedo stage.	PCS1
SHI_00003070-RA	2.05344	5.40862	3.13e-11	Up	AT5G39740	Encodes a ribosomal protein RPL5B that is involved in ribosome biogenesis and plays a role in organ size control by promoting cell proliferation and preventing compensation in normal leaf development.	RPL5B
SHI_00016664-RA	-2.16764	5.14864	3.3e-11	Down	AT5G15440	EID1-like 1	EDL1
SHI_00023107-RA	3.23607	8.96152	3.3e-11	Up	AT1G53270	ABC-2 type transporter family protein	ABCG10
SHI_00029492-RA	-3.32078	7.96963	3.41e-11	Down	AT2G28950	Encodes an expansin. Naming convention from the Expansin Working Group (Kende et al, 2004. Plant Mol Bio). Involved in the formation of nematode-induced syncytia in roots of Arabidopsis thaliana.	EXPA6
SHI_00000026-RA	2.7656	5.27204	3.81e-11	Up	AT2G03590	Encodes a member of a class of allantoin transporters.	UPS1
SHI_00013607-RA	-2.52305	4.45567	4.1e-11	Down	AT5G01070	RING/FYVE/PHD zinc finger superfamily protein	AT5G01070
SHI_00022735-RA	-2.92512	8.50504	4.32e-11	Down	AT4G14550	IAA14 is a member of the Aux/IAA protein family. Involved in lateral root development. Gain of function mutation decreases auxin-inducible gene expression. Protein is localized to the nucleus. Expressed in stele and root tip epidermis. Functions as a negative regulator of ARF7/19.	IAA14
SHI_00000687-RA	4.88981	3.03672	4.75e-11	Up	AT1G64380	encodes a member of the DREB subfamily A-6 of ERF/AP2 transcription factor family. The protein contains one AP2 domain. There are 8 members in this subfamily including RAP2.4.	AT1G64380
SHI_00019875-RA	6.94635	1.645	4.79e-11	Up	AT2G21100	Disease resistance-responsive (dirigent-like protein) family protein	AT2G21100
SHI_00025595-RA	-3.54209	3.42561	5.22e-11	Down	AT3G49900	Phototropic-responsive NPH3 family protein	AT3G49900
SHI_00023898-RA	2.25678	3.42206	5.27e-11	Up	AT4G10240	B-box zinc finger family protein	BBX23
SHI_00008961-RA	2.82093	5.36629	5.61e-11	Up	AT1G76360	Protein kinase superfamily protein	PBL31
SHI_00028080-RA	2.14897	6.44841	5.69e-11	Up	AT2G16130	polyol/monosaccharide transporter 2	PMT2
SHI_00003094-RA	-2.81142	5.91304	5.71e-11	Down	AT3G13510	carboxyl-terminal peptidase, putative (DUF239)	AT3G13510
SHI_00010282-RA	6.63132	5.9849	5.77e-11	Up	AT2G46150	Late embryogenesis abundant (LEA) hydroxyproline-rich glycoprotein family	AT2G46150
SHI_00016696-RA	6.08995	0.849101	6.02e-11	Up	AT1G14160	Uncharacterized protein family (UPF0497)	CASPL1A1
SHI_00026046-RA	2.72359	6.19711	6.02e-11	Up	AT4G08770	Encodes a putative apoplastic peroxidase Prx37. Primarily expressed in the vascular bundles. Overexpression renders a dwarf phenotype with smaller plants and delayed development. Plants overexpressing Prx37 also shows an increase in the amount of esterified phenolic material associated with their walls.	PRX37
SHI_00028744-RA	3.57539	6.2526	6.09e-11	Up	AT2G27130	Bifunctional inhibitor/lipid-transfer protein/seed storage 2S albumin superfamily protein	LTPG12
SHI_00018633-RA	6.09233	1.3466	6.27e-11	Up	AT1G55290	encodes a protein whose sequence is similar to oxidoreductase, 2OG-Fe(II) oxygenase	F6'H2
SHI_00000783-RA	2.43004	8.44412	6.27e-11	Up	AT2G17860	Pathogenesis-related thaumatin superfamily protein	AT2G17860
SHI_00025636-RA	2.07001	5.61183	6.27e-11	Up	AT5G65110	Encodes an acyl-CoA oxidase presumably involved in long chain fatty acid biosynthesis.	ACX2
SHI_00011531-RA	7.10918	3.80682	6.32e-11	Up	AT1G69770	Encodes a chromomethylase involved in methylating cytosine residues at non-CG sites. Involved in preferentially methylating transposon-related sequences, reducing their mobility. CMT3 interacts with an Arabidopsis homologue of HP1 (heterochromatin protein 1), which in turn interacts with methylated histones. Involved in gene silencing.	CMT3
SHI_00000150-RA	8.14983	1.99021	6.32e-11	Up	AT1G67100	LOB domain-containing protein 40	LBD40
SHI_00027457-RA	8.05255	1.9773	6.32e-11	Up	AT1G18835	Encodes a small zinc &#64257	MIF3
SHI_00000653-RA	2.02227	6.06816	6.38e-11	Up	AT1G31910	GHMP kinase family protein	AT1G31910
SHI_00001794-RA	2.46063	3.97908	6.82e-11	Up	AT4G19120	S-adenosyl-L-methionine-dependent methyltransferases superfamily protein	ERD3
SHI_00010181-RA	-3.35653	3.94058	6.82e-11	Down	AT3G60320	bZIP domain class transcription factor (DUF630 and DUF632)	NRG2
SHI_00009188-RA	5.60976	3.84325	6.83e-11	Up	AT4G24310	transmembrane protein, putative (DUF679)	DMP3
SHI_00002507-RA	3.68201	2.13422	6.84e-11	Up	AT3G48900	Encodes one of two GEN1 homologs in Arabidopsis. It is a member of the class IV Rad2/XPG family of nucleases that processes Holliday junctions in a manner analogous to the HJ resolvases of phages, archaea, and bacteria.	SEND1
SHI_00011860-RA	-3.20779	7.94313	6.84e-11	Down	AT2G37170	a member of the plasma membrane intrinsic protein subfamily PIP2. localizes to the plasma membrane and exhibits water transport activity in Xenopus oocyte. expressed specifically in the vascular bundles and protein level increases slightly during leaf dev	PIP2B
SHI_00005146-RA	5.74303	3.28461	7.23e-11	Up	AT5G57720	AP2/B3-like transcriptional factor family protein	AT5G57720
SHI_00027965-RA	-3.1648	2.70631	7.42e-11	Down	AT1G79720	Eukaryotic aspartyl protease family protein	AT1G79720
SHI_00013051-RA	-3.23301	7.22722	7.43e-11	Down	AT4G09350	Chaperone DnaJ-domain superfamily protein	NDHT
SHI_00012456-RA	-2.7688	5.24275	7.52e-11	Down	AT3G60390	Encodes homeobox protein HAT3.	HAT3
SHI_00014843-RA	3.34056	4.04993	8.04e-11	Up	AT5G51550	EXORDIUM like 3	EXL3
SHI_00009926-RA	2.99478	3.27769	8.05e-11	Up	AT1G16905	Curculin-like (mannose-binding) lectin family protein	AT1G16905
SHI_00006876-RA	5.38617	1.26983	8.23e-11	Up	AT1G14480	Ankyrin repeat family protein	AT1G14480
SHI_00019778-RA	4.84693	3.86104	8.23e-11	Up	AT5G67050	alpha/beta-Hydrolases superfamily protein	AT5G67050
SHI_00026812-RA	3.75033	1.51514	9.03e-11	Up	AT5G42330	hypothetical protein	AT5G42330
SHI_00005467-RA	3.19879	3.5976	9.56e-11	Up	AT3G54260	Encodes a member of the TBL (TRICHOME BIREFRINGENCE-LIKE) gene family containing a plant-specific DUF231 (domain of unknown function) domain. TBL gene family has 46 members, two of which (TBR/AT5G06700 and TBL3/AT5G01360) have been shown to be involved in the synthesis and deposition of secondary wall cellulose, presumably by influencing the esterification state of pectic polymers. A nomenclature…	TBL36
SHI_00001992-RA	5.34458	0.954249	9.72e-11	Up	AT3G49190	O-acyltransferase (WSD1-like) family protein	AT3G49190
SHI_00024044-RA	6.19003	3.82848	9.72e-11	Up	AT4G15660	Encodes a member of the CC-type glutaredoxin (ROXY) family.	GRXS8
SHI_00002165-RA	5.20034	5.46409	9.72e-11	Up	AT4G21590	Encodes a putative endonuclease but no demonstrable endonuclease activity, either towards single stranded DNA or mismatches, has been seen in vitro. Activated by AGAMOUS in a cal-1, ap1-1 background. Expressed in the floral meristem and during stamen development.	ENDO3
SHI_00006300-RA	3.36092	5.31954	9.87e-11	Up	AT5G50330	Protein kinase superfamily protein	AT5G50330
SHI_00012891-RA	4.31845	5.06753	1.03e-10	Up	AT1G76160	SKU5 similar 5	SKS5
SHI_00005925-RA	2.08706	4.07414	1.03e-10	Up	AT1G64460	phosphatidylinositol 4-kinase gamma-like protein	AT1G64460
SHI_00029375-RA	5.40185	0.991284	1.06e-10	Up	AT1G61550	S-locus lectin protein kinase family protein	AT1G61550
SHI_00021746-RA	2.24475	5.68949	1.08e-10	Up	AT4G13890	Pyridoxal phosphate (PLP)-dependent transferases superfamily protein	EDA36
SHI_00024579-RA	-6.09424	4.63844	1.11e-10	Down	AT5G01790	hypothetical protein	AT5G01790
SHI_00026703-RA	2.0925	5.92821	1.12e-10	Up	AT1G35160	GF14 protein phi chain member of 14-3-3 protein family. This protein is reported to interact with the BZR1 transcription factor involved in brassinosteroid signaling and may affect the nucleocytoplasmic shuttling of BZR1 The mRNA is cell-to-cell mobile.	GF14 PHI
SHI_00001681-RA	3.82838	1.76616	1.19e-10	Up	AT2G26260	Encodes an enzyme with 3&#946	3BETAHSD/D2
SHI_00026273-RA	2.95332	2.98489	1.19e-10	Up	AT5G40850	Encodes a urophorphyrin III methylase that catalyzes S-adenosyl-L-methionine-dependent transmethylation in a multistep process involving the formation of a covalently linked complex with S-adenosyl-L-methionine. The mRNA is cell-to-cell mobile.	UPM1
SHI_00024616-RA	4.19355	4.4825	1.24e-10	Up	AT3G26310	putative cytochrome P450	CYP71B35
SHI_00028206-RA	6.07806	5.6877	1.34e-10	Up	AT2G16630	Pollen Ole e 1 allergen and extensin family protein	FOCL1
SHI_00028176-RA	3.76613	6.20382	1.39e-10	Up	AT2G18420	Encodes a Gibberellin-regulated GASA/GAST/Snakin family protein	AT2G18420
SHI_00016828-RA	4.03146	4.0594	1.4e-10	Up	AT3G01513	hypothetical protein	AT3G01513
SHI_00029143-RA	-3.09045	3.03435	1.63e-10	Down	AT1G08810	putative transcription factor of the R2R3-MYB gene family. Transcript increases under conditions that promote stomatal opening (white and blue light, abi1-1 mutation) and decreases under conditions that trigger stomatal closure (ABA, desiccation, darkness), with the exception of elevated CO2. Expressed exclusively in guard cells of all tissues. It is required for light-induced opening of stomata.…	MYB60
SHI_00011030-RA	-3.24872	6.11489	1.72e-10	Down	AT2G40475	hypothetical protein	ASG8
SHI_00016708-RA	6.43688	2.22141	1.77e-10	Up	AT3G28960	Transmembrane amino acid transporter family protein	AT3G28960
SHI_00023247-RA	5.88966	0.616742	1.78e-10	Up	AT1G67110	cytochrome P450, family 735, subfamily A, polypeptide 2	CYP735A2
SHI_00026465-RA	5.04274	0.973643	1.78e-10	Up	AT1G72230	Cupredoxin superfamily protein	AT1G72230
SHI_00011661-RA	5.79161	1.04689	1.94e-10	Up	AT1G32928	Avr9/Cf-9 rapidly elicited protein	AT1G32928
SHI_00020688-RA	5.63862	1.21083	1.97e-10	Up	AT4G05520	Encodes AtEHD2, one of the Arabidopsis Eps15 homology domain proteins involved in endocytosis (AtEHD1, At3g20290).	EHD2
SHI_00008730-RA	-2.76109	5.78987	1.97e-10	Down	AT1G49620	Kip-related protein (KRP) gene, encodes CDK (cyclin-dependent kinase) inhibitor (CKI), negative regulator of cell division. A member of seven KRP genes found in Arabidopsis thaliana. Differential expression patterns for distinct KRPs were revealed by in situ hybridization. Binds to D type cyclins and may inhibit cell cycle.	ICK5
SHI_00002535-RA	2.12419	4.93537	2.04e-10	Up	AT5G52740	Copper transport protein family	AT5G52740
SHI_00023392-RA	4.96111	5.79918	2.07e-10	Up	AT5G67400	root hair specific 19	RHS19
SHI_00021345-RA	10.2135	8.82752	2.08e-10	Up	AT1G02190	Fatty acid hydroxylase superfamily	CER1-L1
SHI_00014599-RA	7.01905	2.28406	2.12e-10	Up	AT3G62030	nuclear-encoded chloroplast stromal cyclophilin CYP20-3 (also known as ROC4). Protein is tyrosine-phosphorylated and its phosphorylation state is modulated in response to ABA in Arabidopsis thaliana seeds.	ROC4
SHI_00010900-RA	5.66441	8.11608	2.14e-10	Up	AT3G54040	PAR1 protein	AT3G54040
SHI_00004314-RA	5.13368	5.73389	2.14e-10	Up	AT4G18950	BHP1 is a Raf-like protein kinase involved in mediating blue light dependent stomatal opening.	BHP
SHI_00014147-RA	5.83037	0.607067	2.17e-10	Up	AT3G47350	Encodes a putative hydroxysteroid dehydrogenase (HSD). Genes that encode HSD include: At5g50600 and At5g50700 (HSD1), At3g47350(HSD2), At3g47360(HSD3), At5g50590 and At5g50690(HSD4), At5g50770(HSD6) (Plant Cell Physiology 50:1463). Two copies of HSD1 and HSD4 exist due to a gene duplication event. In Plant Physiology 145:87, At5g50690 is HSD7, At4g10020 is HSD5.	HSD2
SHI_00002861-RA	4.07392	2.81127	2.24e-10	Up	AT2G06850	endoxyloglucan transferase (EXGT-A1) gene	XTH4
SHI_00000350-RA	5.87413	1.05313	2.29e-10	Up	AT5G05490	Encodes a RAD21-like gene essential for meiosis. Encodes a 617 a.a. protein that is slightly shorter in the N-terminus than SYN1 BP2.	SYN1
SHI_00004954-RA	2.11213	5.20556	2.4e-10	Up	AT3G62830	encodes an isoform of UDP-glucuronic acid decarboxylase, which is predicted to be membrane-bound by PSORT. This enzyme produces UDP-xylose, which is a substrate for many cell wall carbohydrates including hemicellulose and pectin. UDP-xylose is also known to feedback regulate several cell wall biosynthetic enzymes.	AUD1
SHI_00017592-RA	4.48077	4.7866	2.43e-10	Up	AT2G38310	Encodes a member of the PYR (pyrabactin resistance )/PYL(PYR1-like)/RCAR (regulatory components of ABA receptor) family proteins with 14 members. PYR/PYL/RCAR family proteins function as abscisic acid sensors. Mediate ABA-dependent regulation of protein phosphatase 2Cs ABI1 and ABI2. The mRNA is cell-to-cell mobile.	PYL4
SHI_00022888-RA	5.15622	2.28588	2.6e-10	Up	AT5G63920	Encodes topoisomerase 3alpha. Suppresses somatic crossovers. Essential for resolution of meiotic recombination intermediates.	TOP3A
SHI_00010313-RA	2.8617	3.03851	2.6e-10	Up	AT2G37620	Member of the actin gene family. Expressed in mature pollen.	ACT1
SHI_00020238-RA	-4.53448	4.54497	2.66e-10	Down	AT4G30410	sequence-specific DNA binding transcription factor	IBL1
SHI_00007263-RA	4.06042	2.27785	2.79e-10	Up	AT4G26490	Late embryogenesis abundant (LEA) hydroxyproline-rich glycoprotein family	AT4G26490
SHI_00021352-RA	7.91048	1.82714	2.8e-10	Up	AT4G39890	RAB GTPase homolog H1C	RABH1C
SHI_00001630-RA	8.65632	0.783223	2.88e-10	Up	AT1G79880	RNA recognition motif (RRM)-containing protein	LA2
SHI_00018822-RA	2.99265	4.99915	3.09e-10	Up	AT1G48860	5-enolpyruvylshikimate-3-phosphate synthase involved in shikimic acid biosynthesis.	EPSPS
SHI_00027476-RA	3.10294	8.70729	3.1e-10	Up	AT3G47960	Encodes a high-affinity, proton-dependent glucosinolate-specific transporter that is crucial for the transport of both methionine- and tryptophan-derived glucosinolates to seeds.	NPF2.10
SHI_00010108-RA	2.91497	6.50612	3.28e-10	Up	AT4G28570	Long-chain fatty alcohol dehydrogenase family protein	AT4G28570
SHI_00022379-RA	-3.09797	8.7876	3.3e-10	Down	AT3G22970	hypothetical protein (DUF506)	AT3G22970
SHI_00004916-RA	-2.23707	5.63149	3.5e-10	Down	AT2G47890	B-box type zinc finger protein with CCT domain-containing protein	AT2G47890
SHI_00016768-RA	2.78189	3.76025	3.72e-10	Up	AT5G14960	DP-E2F-like 2	DEL2
SHI_00028885-RA	-2.66558	4.52488	3.83e-10	Down	AT3G57400	transmembrane protein	AT3G57400
SHI_00020537-RA	6.66184	8.83355	3.85e-10	Up	AT1G78380	Encodes a glutathione transferase that is a member of Tau GST gene family. Expression is induced by drought stress, oxidative stress, and high doses of auxin and cytokinin. naming convention according to Wagner et al. (2002) The expression of this gene is upregulated by herbicide safeners such as benoxacor and fenclorim.	GSTU19
SHI_00021918-RA	5.31957	2.51257	3.94e-10	Up	AT2G47260	Encodes a member of WRKY Transcription Factor	WRKY23
SHI_00013904-RA	4.90817	2.60443	3.95e-10	Up	AT2G26740	Encodes a soluble epoxide hydrolase whose expression is induced by auxin and water stress.	SEH
SHI_00012619-RA	-2.11856	6.49915	3.96e-10	Down	AT3G06380	Member of plant TLP family which differs in having an F box domain. Interacts with ASK proteins.Plasma membrane tethering is mediated by PIP2 binding domain. Mutants are insensitive to ABA. May act redundantly with its paralog TPL3.	TLP9
SHI_00015483-RA	-2.94885	2.2214	3.96e-10	Down	AT2G19900	The malic enzyme (EC 1.1.1.40) encoded by AtNADP-ME1 is expressed in response to developmental and cell-specific signals. The enzyme is active in vitro and appears to function as a homohexamer or homooctamer. It is believed to be a cytosolic protein.	NADP-ME1
SHI_00003256-RA	-2.05317	5.86452	4e-10	Down	AT1G01060	LHY encodes a myb-related putative transcription factor involved in circadian rhythm along with another myb transcription factor CCA1	LHY
SHI_00027477-RA	6.02266	2.3776	4.38e-10	Up	AT3G47950	mutant has Slight reduction in root and shoot growth	+
SHI_00012331-RA	2.43411	5.18208	4.56e-10	Up	AT3G61160	Protein kinase superfamily protein	AT3G61160
SHI_00018319-RA	-2.04074	6.26063	4.68e-10	Down	AT4G13840	HXXXD-type acyl-transferase family protein	CER26
SHI_00003408-RA	3.0882	3.21369	4.74e-10	Up	AT5G57130	Encodes a member of an eight-gene family (SMAX1 and SMAX1-like) that has weak similarity to AtHSP101, a ClpB chaperonin required for thermotolerance.	SMXL5
SHI_00027612-RA	4.86578	2.6795	4.91e-10	Up	AT5G61890	encodes a member of the ERF (ethylene response factor) subfamily B-4 of ERF/AP2 transcription factor family. The protein contains one AP2 domain. There are 7 members in this subfamily.	ERF114
SHI_00010392-RA	-2.14366	3.78671	5.56e-10	Down	AT1G01520	RVE3 is one of eleven homologous MYB-like transcription factors in Arabidopsis and a member of the RVE8 clade. Plays a minor role in clock regulation.	ASG4
SHI_00016681-RA	-2.22984	4.5607	5.6e-10	Down	AT5G57630	CBL-interacting protein kinase.When mutated plants are hypersensitive to salt and osmotic stress.	CIPK21
SHI_00003387-RA	-3.00845	4.74619	5.7e-10	Down	AT3G54720	Encodes glutamate carboxypeptidase. Various alleles show-increased cotyledon number and rate of leaf initiation, show transformation of leaves to cotyledons, altered flowering time and photomorphogenesis and an increased level of cytokinin biosynthesis. Involved in ethylene enhanced hypocotyl elongation in the light. Strong genetic interaction between TGH and AMP1.	AMP1
SHI_00003441-RA	-2.50594	3.7869	5.75e-10	Down	AT4G04630	senescence regulator (Protein of unknown function, DUF584)	AT4G04630
SHI_00026729-RA	3.347	6.04039	5.81e-10	Up	AT1G35720	Encodes a member of the annexin gene family, a diverse, multigene family of calcium-dependent, membrane-binding proteins. The protein was determined to have peroxidase activity. This activity is thought to be dependent on the presence of post-translational modifications (most likely phosphorylation). The protein was shown to be present as a mixture of monomer and homodimer. The homodimerization s…	ANNAT1
SHI_00002021-RA	3.32313	7.8499	5.86e-10	Up	AT3G59140	member of MRP subfamily	ABCC10
SHI_00020032-RA	4.86095	0.805556	6.41e-10	Up	AT3G23550	MATE efflux family protein	DTX18
SHI_00023418-RA	-5.09763	6.27367	6.59e-10	Down	AT5G40310	Exonuclease family protein	AT5G40310
SHI_00015446-RA	2.09824	6.80588	6.81e-10	Up	AT1G52300	Zinc-binding ribosomal protein family protein	AT1G52300
SHI_00013043-RA	3.17379	5.28872	6.9e-10	Up	AT3G63010	Encodes a gibberellin (GA) receptor ortholog of the rice GA receptor gene (OsGID1). Has GA-binding activity, showing higher affinity to GA4. Interacts with DELLA proteins in vivo in the presence of GA4. The mRNA is cell-to-cell mobile.	GID1B
SHI_00020083-RA	-2.46857	5.29499	7.01e-10	Down	AT4G27470	Encodes a RING finger E3 ubiquitin ligase.	RMA3
SHI_00003231-RA	4.98214	3.49685	7.38e-10	Up	AT1G20200	PAM domain (PCI/PINT associated module) protein	EMB2719
SHI_00014365-RA	4.82948	2.17176	7.47e-10	Up	AT5G21274	Encodes a calmodulin isoform. Expressed in leaves.	CAM6
SHI_00026235-RA	2.11606	6.4016	7.74e-10	Up	AT2G19740	Ribosomal protein L31e family protein	AT2G19740
SHI_00025870-RA	-2.84866	5.90711	7.74e-10	Down	AT5G12960	proline-tRNA ligase (DUF1680)	AT5G12960
SHI_00006149-RA	-3.18993	2.92099	8.97e-10	Down	AT5G52900	Encodes a member of the MAKR (MEMBRANE-ASSOCIATED KINASE REGULATOR) gene family. MAKRs have putative kinase interacting motifs and membrane localization signals. Known members include: AT5G26230 (MAKR1), AT1G64080 (MAKR2), AT2G37380 (MAKR3), AT2G39370 (MAKR4), AT5G52870 (MAKR5) and AT5G52900 (MAKR6).	MAKR6
SHI_00030575-RA	2.66409	6.42904	9.31e-10	Up	AT2G27510	ferredoxin 3	FD3
SHI_00030653-RA	5.10911	7.27306	9.38e-10	Up	AT5G48540	receptor-like protein kinase-related family protein	AT5G48540
SHI_00018972-RA	3.88863	6.30534	9.82e-10	Up	AT5G57800	encodes a transmembrane protein with similarity to the sterol desaturase family at the N-terminus and to the short-chain dehydrogenase/reductase family at the C-terminus. Mutant analyses indicate this protein is involved in cuticle membrane and wax biosynthesis. The mRNA is cell-to-cell mobile.	CER3
SHI_00003132-RA	4.59797	8.05893	9.85e-10	Up	AT2G30490	Encodes a cinnamate-4-hydroxylase. Mutations in this gene impact phenylpropanoid metabolism, growth and development.	C4H
SHI_00018391-RA	2.34762	3.90848	9.99e-10	Up	AT1G33530	F-box family protein	AT1G33530
SHI_00012971-RA	7.54271	2.17418	1.03e-09	Up	AT2G22760	basic helix-loop-helix (bHLH) DNA-binding superfamily protein	AT2G22760
SHI_00019334-RA	2.84311	6.08353	1.03e-09	Up	AT1G09970	RLK7 belongs to a leucine-rich repeat class of receptor-likekinase (LRR-RLKs). It is involved in the control of germination speed and the tolerance to oxidant stress. The mRNA is cell-to-cell mobile.	LRR XI-23
SHI_00018310-RA	2.73094	8.32373	1.04e-09	Up	AT4G13940	Encodes a S-adenosyl-L-homocysteine hydrolase required for DNA methylation-dependent gene silencing. The mRNA is cell-to-cell mobile.	HOG1
SHI_00001105-RA	6.52055	1.65312	1.06e-09	Up	AT2G02130	Predicted to encode a PR (pathogenesis-related) protein. Belongs to the plant defensin (PDF) family with the following members: At1g75830/PDF1.1, At5g44420/PDF1.2a, At2g26020/PDF1.2b, At5g44430/PDF1.2c, At2g26010/PDF1.3, At1g19610/PDF1.4, At1g55010/PDF1.5, At2g02120/PDF2.1, At2g02100/PDF2.2, At2g02130/PDF2.3, At1g61070/PDF2.4, At5g63660/PDF2.5, At2g02140/PDF2.6, At5g38330/PDF3.1 and At4g30070/PDF…	LCR68
SHI_00004432-RA	-3.28808	5.95897	1.2e-09	Down	AT2G05790	O-Glycosyl hydrolases family 17 protein	AT2G05790
SHI_00026823-RA	5.33258	1.35752	1.25e-09	Up	AT1G20750	RAD3-like DNA-binding helicase protein	AT1G20750
SHI_00017125-RA	-2.31035	5.21001	1.29e-09	Down	AT1G14185	Glucose-methanol-choline (GMC) oxidoreductase family protein	AT1G14185
SHI_00014114-RA	5.24073	1.05857	1.29e-09	Up	AT4G05450	mitochondrial ferredoxin 1	MFDX1
SHI_00005168-RA	2.89835	2.63035	1.29e-09	Up	AT5G60200	Encodes a Dof-type transcription factor. PEAR protein involved in the formation of a short-range concentration gradient that peaks at protophloem sieve elements, and activates gene expression that promotes radial growth. Locally promotes transcription of inhibitory HD-ZIP III genes, and thereby establishes a negative-feedback loop that forms a robust boundary that demarks the zone of cell divisio…	TMO6
SHI_00011618-RA	2.55148	5.81372	1.3e-09	Up	AT5G22650	Encodes a member of a plant-specific class of histone deacetylases. Controls the development of adaxial/abaxial leaf polarity. Its mRNA is widely expressed in stems, leaves, flowers and young siliques. Plant lines expressing RNAi constructs directed against this gene showed a marked reduction in agrobacterium-mediated root transformation.	HD2B
SHI_00002087-RA	4.47594	0.915039	1.31e-09	Up	AT1G16090	Encodes a truncated WAK-like kinase that is predicted to be a secreted protein.	WAKL7
SHI_00016363-RA	4.19815	1.32764	1.32e-09	Up	AT3G06778	Chaperone DnaJ-domain superfamily protein	AT3G06778
SHI_00007466-RA	-2.602	5.02849	1.4e-09	Down	AT4G24050	NAD(P)-binding Rossmann-fold superfamily protein	AT4G24050
SHI_00007055-RA	2.43379	3.24244	1.4e-09	Up	AT1G76800	The gene encodes nodulin-like2 whose transcript abundance was repressed under conditions of Fe-deficient growth.	VTL2
SHI_00006552-RA	5.26085	4.9465	1.44e-09	Up	AT2G44745	WRKY family transcription factor	WRKY12
SHI_00010526-RA	3.91383	1.54858	1.44e-09	Up	AT5G43100	Eukaryotic aspartyl protease family protein	AT5G43100
SHI_00005923-RA	3.20562	4.76115	1.49e-09	Up	AT5G24270	encodes a calcium sensor that is essential for K+ nutrition, K+/Na+ selectivity, and salt tolerance. The protein is similar to calcineurin B. Lines carrying recessive mutations are hypersensitive to Na+ and Li+ stresses and is unable to grow in low K+. The growth defect is rescued by extracellular calcium.	SOS3
SHI_00028418-RA	7.21646	3.74193	1.51e-09	Up	AT4G22530	S-adenosyl-L-methionine-dependent methyltransferases superfamily protein	AT4G22530
SHI_00003378-RA	4.49962	2.23949	1.55e-09	Up	AT1G66950	Encodes a plasma membrane-localized ABC transporter. Confers tolerance to herbicide paraquat.	ABCG39
SHI_00011758-RA	5.89984	0.668748	1.56e-09	Up	AT2G15770	Cupredoxin superfamily protein	AT2G15770
SHI_00014620-RA	5.90974	4.4259	1.66e-09	Up	AT5G13330	encodes a member of the ERF (ethylene response factor) subfamily B-4 of ERF/AP2 transcription factor family. The protein contains one AP2 domain. There are 7 members in this subfamily.	RAP2.6L
SHI_00014887-RA	8.53835	0.669111	1.72e-09	Up	AT1G12940	member of High affinity nitrate transporter family	NRT2.5
SHI_00003038-RA	3.93379	2.94941	1.73e-09	Up	AT4G12420	Encodes a protein of unknown function involved in directed root tip growth. It is a member of 19-member gene family and is distantly related structurally to the multiple-copper oxidases ascorbate oxidase and laccase, though it lacks the copper-binding domains. The protein is glycosylated and GPI-anchored. It is localized to the plasma membrane and the cell wall. The gene is expressed most strongl…	SKU5
SHI_00021213-RA	4.25975	1.28397	1.81e-09	Up	AT3G14810	mechanosensitive channel of small conductance-like 5	MSL5
SHI_00029799-RA	4.35909	1.36979	1.85e-09	Up	AT1G69730	Wall-associated kinase family protein	AT1G69730
SHI_00019745-RA	5.38014	9.27585	1.87e-09	Up	AT4G37310	member of CYP81H	CYP81H1
SHI_00008788-RA	2.83922	5.24921	1.88e-09	Up	AT2G15320	Leucine-rich repeat (LRR) family protein	AT2G15320
SHI_00007096-RA	-2.49436	4.65609	1.94e-09	Down	AT5G49660	The gene encodes receptorlike kinase (RLK). Involved in the maintenance organization of cell files or cell morphology in conductive elements. Functions as a receptor for CEP1 peptide. Mediates nitrate uptake signaling.	XIP1
SHI_00009874-RA	3.86716	4.09869	1.96e-09	Up	AT1G58420	Uncharacterized conserved protein UCP031279	AT1G58420
SHI_00029423-RA	2.0038	4.05897	1.96e-09	Up	AT1G18480	Calcineurin-like metallo-phosphoesterase superfamily protein	SLP2
SHI_00026574-RA	5.92561	4.32182	1.98e-09	Up	AT4G37700	hypothetical protein	AT4G37700
SHI_00010214-RA	4.10738	1.9693	1.98e-09	Up	AT1G02010	member of KEULE Gene Family	SEC1A
SHI_00002136-RA	2.10508	3.73386	1.98e-09	Up	AT1G69910	Protein kinase superfamily protein	AT1G69910
SHI_00004539-RA	-4.93462	2.29193	2.03e-09	Down	AT1G61475	ATP binding / protein kinase	AT1G61475
SHI_00009889-RA	4.53967	1.91344	2.05e-09	Up	AT2G46340	Encodes a member of the SPA (suppressor of phyA-105) protein family (SPA1-SPA4). SPA proteins contain an N-terminal serine/threonine kinase-like motif followed by a coiled-coil structure and a C-terminal WD-repeat domain. SPA1 is a PHYA signaling intermediate, putative regulator of PHYA signaling pathway. Light responsive repressor of photomorphogenesis. Involved in regulating circadian rhythms a…	SPA1
SHI_00029210-RA	-4.04807	2.118	2.13e-09	Down	AT3G56891	Heavy metal transport/detoxification superfamily protein	AT3G56891
SHI_00014055-RA	-2.19103	6.20113	2.24e-09	Down	AT3G05640	EGR1 functions as a negative regulator of plant growth with prominent effect on plant growth during drought stress.EGR1 regulates microtubule organization and likely affects additional cytoskeleton and trafficking processes along the plasma membrane.	EGR1
SHI_00011085-RA	5.25342	0.875817	2.33e-09	Up	AT3G02330	Involved in cytidine to uridine editing of the mitochondrial mRNA AtMg00510.	MEF13
SHI_00019605-RA	2.07326	6.16932	2.7e-09	Up	AT3G08030	The mRNA of this gene is expressed in viable seeds. Its detection in a dry seed lot has potential for use as a molecular marker for germination performance as absence of expression correlates with decreased germination. Encodes DUF642 cell wall protein.	ATHA2-1
SHI_00010973-RA	6.59396	4.48789	2.91e-09	Up	AT2G38250	Homeodomain-like superfamily protein	AT2G38250
SHI_00009459-RA	2.10069	5.69815	2.98e-09	Up	AT5G16880	Target of Myb protein 1	AT5G16880
SHI_00006226-RA	-5.04905	4.94364	3.39e-09	Down	AT2G06200	Growth regulating factor encoding transcription activator. One of the nine members of a GRF gene family, containing nuclear targeting domain. Involved in leaf development and expressed in root, shoot and flower	GRF6
SHI_00017157-RA	2.32484	3.504	3.4e-09	Up	AT1G72790	hydroxyproline-rich glycoprotein family protein	AT1G72790
SHI_00016125-RA	2.64862	5.1494	3.48e-09	Up	AT5G62730	Major facilitator superfamily protein	AT5G62730
SHI_00014663-RA	2.16444	4.38937	3.64e-09	Up	AT5G08240	transmembrane protein	AT5G08240
SHI_00002469-RA	-2.55163	3.77993	3.73e-09	Down	AT5G07180	Encodes a receptor-like kinase that, together with ER and ERL1 governs the initial decision of protodermal cells to either divide proliferatively to produce pavement cells or divide asymmetrically to generate stomatal complexes. It is also important for maintaining stomatal stem cell activity and preventing terminal differentiation of the meristemoid into the guard mother cell. When heterozygous …	ERL2
SHI_00015818-RA	5.84024	3.47143	3.76e-09	Up	AT1G56120	Leucine-rich repeat transmembrane protein kinase	AT1G56120
SHI_00024604-RA	3.11519	6.13879	3.77e-09	Up	AT5G05220	hypothetical protein	AT5G05220
SHI_00031048-RA	2.09054	7.37151	3.91e-09	Up	AT3G51190	Ribosomal protein L2 family	AT3G51190
SHI_00005696-RA	5.55883	1.72046	4.15e-09	Up	AT4G18830	Member of the ovate protein family.Interacts with BLH1 and KNAT3. Regulates the subcellular localization of BLH1.I May also directly affect microtubule organization via interactions with TON2.	OFP5
SHI_00024606-RA	2.20354	5.20351	4.31e-09	Up	AT5G05190	hypothetical protein (DUF3133)	EDR4
SHI_00011204-RA	-4.75995	2.12269	4.58e-09	Down	AT2G38400	alanine:glyoxylate aminotransferase 2 homolog (AGT3) mRNA,	AGT3
SHI_00020642-RA	3.74733	1.09717	4.58e-09	Up	AT3G61420	BSD domain (BTF2-like transcription factors, Synapse-associated proteins and DOS2-like proteins)	AT3G61420
SHI_00019247-RA	-2.65272	6.92985	4.61e-09	Down	AT1G35460	Encodes a bHLH transcription factor involved in CFL1-mediated regulation of cuticle development. Overexpression leads to abnormal cuticle development.	FBH1
SHI_00024632-RA	7.10587	3.28428	4.78e-09	Up	AT5G50260	Encodes a papain-like cysteine protease involved in tapetal programmed cell death and pollen development.CEP1 is expressed specifically in the tapetum from stages 5 to 11 of anther development. The CEP1 protein first appears as a proenzyme in precursor protease vesicles, and is then transported to the vacuole and transformed into the mature enzyme before rupture of the vacuole. CEP1 was also rele…	CEP1
SHI_00008178-RA	-4.03947	6.64322	4.9e-09	Down	AT1G22690	Gibberellin-regulated family protein	AT1G22690
SHI_00024098-RA	3.02841	4.20783	4.97e-09	Up	AT3G59540	Ribosomal L38e protein family	AT3G59540
SHI_00028713-RA	-2.96923	8.47574	5.07e-09	Down	AT3G48940	Remorin family protein	AT3G48940
SHI_00014526-RA	-2.58203	3.75422	5.25e-09	Down	AT1G67830	Encodes a protein with &#945	FXG1
SHI_00010646-RA	4.44679	0.802721	5.25e-09	Up	AT5G36220	member of CYP81D family of cytochrome p450s. This gene was originally called CYP91A1, but was later renamed to CYP81D1.	CYP81D1
SHI_00000975-RA	8.48743	0.631717	5.48e-09	Up	AT1G32850	ubiquitin-specific protease 11	UBP11
SHI_00002827-RA	4.38355	3.59368	5.51e-09	Up	AT5G13200	Encodes a protein with unknown function that is involved in hormone mediated regulation of seed germination/dormancy.	GER5
SHI_00011835-RA	5.46981	2.00904	5.55e-09	Up	AT4G29990	Leucine-rich repeat transmembrane protein kinase protein	AT4G29990
SHI_00016811-RA	-3.72244	4.02626	5.6e-09	Down	AT3G27960	Tetratricopeptide repeat (TPR)-like superfamily protein	KLCR2
SHI_00012042-RA	5.81159	1.97168	5.6e-09	Up	AT4G15740	Calcium-dependent lipid-binding (CaLB domain) family protein	AT4G15740
SHI_00014644-RA	2.88763	4.04841	5.89e-09	Up	AT1G28190	hypothetical protein	AT1G28190
SHI_00007551-RA	4.89633	1.34705	5.99e-09	Up	AT5G23420	Encodes HMGB6, a protein belonging to the subgroup of HMGB (high mobility group B) proteins. Localized in the nucleus. Binds to supercoiled DNA in vitro. HMGB6 is phosphorylated by protein kinase CK2alpha within its acidic C-terminal domain.	HMGB6
SHI_00022059-RA	2.62287	5.48773	6.01e-09	Up	AT3G58750	Encodes a peroxisomal citrate synthase that is expressed throughout seedling and shoot development.	CSY2
SHI_00018697-RA	6.34493	0.989953	6.08e-09	Up	AT3G21490	Heavy metal transport/detoxification superfamily protein	AT3G21490
SHI_00001021-RA	3.51227	1.31032	6.16e-09	Up	AT5G23400	Leucine-rich repeat (LRR) family protein	AT5G23400
SHI_00018673-RA	4.22614	0.897179	6.2e-09	Up	AT3G06260	Encodes a protein with putative galacturonosyltransferase activity.	GATL4
SHI_00001011-RA	4.96418	0.805668	6.46e-09	Up	AT5G08350	Mutants have decreased tolerance to cold and oxidative stress. Gene expression induced by drought and ABA.	AT5G08350
SHI_00006386-RA	4.68228	3.17725	6.56e-09	Up	AT3G30842	pleiotropic drug resistance 10	ABCG38
SHI_00028869-RA	2.56271	4.24364	6.8e-09	Up	AT3G28450	Negative regulator of pattern-triggered immunity in complex with BIR3 and PLD&#947	BIR2
SHI_00016535-RA	-2.88112	6.43823	7.26e-09	Down	AT5G66560	Phototropic-responsive NPH3 family protein	AT5G66560
SHI_00017613-RA	2.17701	7.13638	7.56e-09	Up	AT5G05470	Encodes an eIF2alpha homolog that can be phosphorylated by GCN2 in vitro.	EIF2 ALPHA
SHI_00007000-RA	3.13803	6.64468	7.79e-09	Up	AT5G64300	encodes GTP cyclohydrolase II that can functionally complement E. coli mutant deficient in this gene. It also has 3,4-dihydroxy-2-butanone-4-phosphate synthase activity which makes it a bifunctional enzyme involved in the formation of the pyrimidine and of the carbohydrate from GTP and ribulose-5-phosphate, respectively The mRNA is cell-to-cell mobile.	GCH
SHI_00024970-RA	4.72506	1.42572	8.34e-09	Up	AT1G18860	member of WRKY Transcription Factor	WRKY61
SHI_00016132-RA	2.15299	6.45445	8.7e-09	Up	AT1G27100	Actin cross-linking protein	AT1G27100
SHI_00016514-RA	2.25508	4.77639	8.85e-09	Up	AT5G66920	SKU5 similar 17	SKS17
SHI_00005720-RA	6.95387	1.68162	8.98e-09	Up	AT2G39030	Encodes a protein that acts as an ornithine N-delta-acetyltransferase, leading to the formation of N-delta-actetylornithine. This compound is likely used in plant defense and levels of it are increased in Arabidopsis plants in response to MeJA and ABA. The mRNA is cell-to-cell mobile.	NATA1
SHI_00009863-RA	2.04835	7.22828	9.39e-09	Up	AT4G16720	Ribosomal protein L23/L15e family protein	AT4G16720
SHI_00006803-RA	3.70597	1.33598	9.53e-09	Up	AT5G41880	DNA primase POLA3	POLA3
SHI_00005415-RA	2.39466	7.28524	9.79e-09	Up	AT1G78000	Encodes a sulfate transporter that can restore sulfate uptake capacity of a yeast mutant lacking sulfate transporter genes.	SULTR1;2
SHI_00028519-RA	-2.25278	5.98723	9.88e-09	Down	AT3G01310	Encodes a functional VIP1/PPIP5K-type ATP-grasp kinase that is involved in both InsP6 to InsP7 conversion and InsP7 to InsP8 conversion, producing the InsP8 cofactor of the ASK1-COI1-JAZ-jasmonate co-receptor complex. It is the major isoform in plants, is required for jasmonate-dependent defenses, and plays an important role in plant defenses against necrotrophic fungi and insect herbivores.	ATVIP1
SHI_00028436-RA	-3.40973	5.32415	1.02e-08	Down	AT3G57040	response regulator ARR9, A two-component response regulator-like protein with a receiver domain with a conserved aspartate residue and a possible phosphorylation site and at the N-terminal half. Appears to interact with histidine kinase like genes ATHP3 and ATHP2	ARR9
SHI_00030630-RA	-5.04017	6.66645	1.04e-08	Down	AT5G22090	EAR1 is a negative regulator of ABA signaling that enhances the activity of all six clade A PP2Cs (ABI1, ABI2, HAB1, HAB2, AHG1, AHG3) by interacting with and releasing the N-terminal autoinhibition of these proteins. EAR1 indirectly affects OST1 activity through enhancing ABI1 activity. The EAR1 141-287 fragment is sufficient for the functioning of EAR1 in ABA responses	EAR1
SHI_00004549-RA	-3.35427	4.21752	1.04e-08	Down	AT1G61740	Sulfite exporter TauE/SafE family protein	AT1G61740
SHI_00020186-RA	4.88053	1.61766	1.04e-08	Up	AT1G58684	Ribosomal protein S5 family protein	AT1G58684
SHI_00014441-RA	4.43742	1.39561	1.08e-08	Up	AT4G02290	glycosyl hydrolase 9B13	GH9B13
SHI_00015967-RA	7.41822	2.05714	1.12e-08	Up	AT1G22810	encodes a member of the DREB subfamily A-5 of ERF/AP2 transcription factor family. The protein contains one AP2 domain. There are 16 members in this subfamily including RAP2.1, RAP2.9 and RAP2.10. Overexpression leands to delayed senescence and delayed flowering.	ATERF019
SHI_00018419-RA	2.78317	1.96776	1.12e-08	Up	AT1G47990	Encodes a gibberellin 2-oxidase that acts on C19 gibberellins. AtGA2OX4 expression is responsive to cytokinin and KNOX activities.	GA2OX4
SHI_00007656-RA	-2.45832	5.49022	1.14e-08	Down	AT1G70900	hypothetical protein	AT1G70900
SHI_00030039-RA	4.93741	0.896663	1.16e-08	Up	AT4G25240	Encodes GPI-anchored SKU5-like protein. Acts redundantly with SKU5 and SKS1 in roots.	SKS1
SHI_00020005-RA	5.70927	2.54968	1.16e-08	Up	AT2G42600	Encodes one of four Arabidopsis phosphoenolpyruvate carboxylase proteins.PPC1 and PPC2 are crucial for balancing carbon and nitrogen metabolism.	PPC2
SHI_00014081-RA	3.87225	2.64464	1.18e-08	Up	AT4G01250	AtWRKY22 is a member of WRKY Transcription Factor	WRKY22
SHI_00019749-RA	2.4716	5.9104	1.22e-08	Up	AT4G37370	member of CYP81D	CYP81D8
SHI_00016325-RA	4.9667	1.40298	1.25e-08	Up	AT3G17350	wall-associated receptor kinase carboxy-terminal protein	AT3G17350
SHI_00020345-RA	2.44006	4.08824	1.25e-08	Up	AT4G29010	Functions in beta-oxidation of fatty acids, similar to CuMFP with L-3-hydroxyacyl-CoA hydrolyase , L-3-hydroxyacyl-dehydrogenase, D-3-hydroxyacyl-CoA epimerase, and 3, 2-enoyl-CoA isomerase activities.	AIM1
SHI_00001485-RA	4.41606	0.766039	1.25e-08	Up	AT3G24515	ubiquitin-conjugating enzyme 37	UBC37
SHI_00003352-RA	2.57703	5.61997	1.29e-08	Up	AT3G53180	Encodes a protein that is the product of a fusion gene with a C-terminal GSI like sequence and an N-terminal part sharing homology with nodulins. It self-assembles into oligomers and its expression is increased in response to flagellin treatment. The protein co-localizes with microtubules and binds gamma-tubulin. RNAi lines are affected in root morphogenesis.	NODGS
SHI_00024377-RA	2.24376	4.67317	1.42e-08	Up	AT3G12520	Encodes a sulfate transporter that in induced under sulfate limitation.	SULTR4;2
SHI_00024945-RA	-2.10874	6.26743	1.44e-08	Down	AT3G53910	malate dehydrogenase-like protein	AT3G53910
SHI_00022611-RA	2.33851	3.10266	1.44e-08	Up	AT1G01440	hypothetical protein (DUF3133)	AT1G01440
SHI_00005394-RA	-2.13118	3.35425	1.46e-08	Down	AT5G64330	Involved in blue light response signaling pathway	NPH3
SHI_00013285-RA	2.82578	6.9077	1.52e-08	Up	AT1G20225	Thioredoxin superfamily protein	AT1G20225
SHI_00002267-RA	3.39313	4.39545	1.52e-08	Up	AT1G74458	transmembrane protein	AT1G74458
SHI_00001220-RA	-2.58371	5.93013	1.61e-08	Down	AT1G68750	Encodes one of four Arabidopsis phosphoenolpyruvate (PEP) carboxylase proteins. But, it is more similar to bacterial PEP carboxylase than plant PEP carboxylase. Efforts to express this enzyme and to demonstrate its enzymatic activity in E.coli failed.	PPC4
SHI_00013709-RA	-5.36554	4.6723	1.61e-08	Down	AT3G52820	purple acid phosphatase 22	PAP22
SHI_00019309-RA	2.48757	6.73273	1.65e-08	Up	AT4G22570	Encodes an adenine phosphoribosyltransferase (APT	APT3
SHI_00021332-RA	4.20129	2.86686	1.67e-08	Up	AT3G22930	Encodes a calmodulin-like protein.	CML11
SHI_00009750-RA	-2.5358	5.23315	1.79e-08	Down	AT5G02080	phosphopantothenate-cysteine ligase-like protein	AT5G02080
SHI_00003755-RA	6.36734	1.98336	1.83e-08	Up	AT5G66700	Encodes a homeodomain protein. Member of HD-ZIP 1 family, most closely related to HB5. AtHB53 is auxin-inducible and its induction is inhibited by cytokinin, especially in roots therefore may be involved in root development.	HB53
SHI_00002776-RA	5.77274	3.6617	1.84e-08	Up	AT1G24735	S-adenosyl-L-methionine-dependent methyltransferases superfamily protein	AT1G24735
SHI_00013281-RA	5.77948	1.00923	2.13e-08	Up	AT5G42180	Peroxidase superfamily protein	PER64
SHI_00030231-RA	2.59235	3.34678	2.14e-08	Up	AT1G03457	RNA-binding (RRM/RBD/RNP motifs) family protein	BRN2
SHI_00015749-RA	4.96414	1.19017	2.56e-08	Up	AT3G62760	Encodes glutathione transferase belonging to the phi class of GSTs. Naming convention according to Wagner et al. (2002).	ATGSTF13
SHI_00016306-RA	2.18551	6.80102	2.59e-08	Up	AT5G57290	60S acidic ribosomal protein family	P3B
SHI_00006583-RA	-2.27409	5.14466	2.64e-08	Down	AT1G17430	alpha/beta-Hydrolases superfamily protein	AT1G17430
SHI_00011903-RA	2.88357	3.07349	2.73e-08	Up	AT2G27820	Encodes a plastid-localized arogenate dehydratase involved in phenylalanine biosynthesis. Not less than six genes encoding ADT were identi&#64257	PD1
SHI_00013631-RA	5.34012	2.03263	2.84e-08	Up	AT5G43290	member of WRKY Transcription Factor	WRKY49
SHI_00014709-RA	2.0831	5.48604	2.92e-08	Up	AT3G49010	Encodes 60S ribosomal protein L13. Homolog of human breast basic conserved 1 (BBC1).	BBC1
SHI_00010552-RA	2.21721	4.61054	3.22e-08	Up	AT5G27670	Encodes HTA7, a histone H2A protein.	HTA7
SHI_00030867-RA	2.93028	5.42386	3.23e-08	Up	AT5G11950	Encodes a protein of unknown function. It has been crystallized and shown to be structurally almost identical to the protein encoded by At2G37210.	LOG8
SHI_00026361-RA	6.44951	0.450917	3.41e-08	Up	AT4G26930	Encodes a putative transcription factor (MYB97).	MYB97
SHI_00006902-RA	-2.10966	5.32071	3.46e-08	Down	AT1G63440	The Arabidopsis P-type ATPase HMA5 is involved in Cu detoxification. hma5 mutant plants exhibit Cu hypersensitivity, which is especially dramatic in roots where HMA5 is mostly expressed.	HMA5
SHI_00022276-RA	2.22745	4.93468	3.67e-08	Up	AT1G07250	UDP-glucosyl transferase 71C4	UGT71C4
SHI_00012021-RA	-2.02296	3.33741	3.73e-08	Down	AT1G77855	BPS1-like protein	AT1G77855
SHI_00014016-RA	-3.28781	8.39952	3.88e-08	Down	AT3G61880	Encodes a cytochrome p450 monooxygenase. Overexpression of this gene allows fruit growth independently of fertilization. The gene is normally expressed only in floral organs(during the Arabidopsis stage 14 flower) and in the funiculus at anthesis.	CYP78A9
SHI_00025833-RA	3.19709	3.4734	3.92e-08	Up	AT5G23240	DNAJ heat shock N-terminal domain-containing protein	DJC76
SHI_00029076-RA	2.12735	6.61209	3.96e-08	Up	AT5G27850	Ribosomal protein L18e/L15 superfamily protein	RPL18C
SHI_00029810-RA	3.325	6.86316	4.04e-08	Up	AT1G59870	ATP binding cassette transporter. Localized to the plasma membrane in uninfected cells. In infected leaves, the protein concentrated at infection sites. Contributes to nonhost resistance to inappropriate pathogens that enter by direct penetration in a salicylic acid?dependent manner. Required for mlo resistance. Has Cd transporter activity (Cd2+ extrusion pump) and contributes to heavy metal resi…	PEN3
SHI_00025529-RA	-2.76028	3.26893	4.11e-08	Down	AT3G49420	Got1/Sft2-like vescicle transport protein family	AT3G49420
SHI_00000113-RA	2.12556	4.27606	4.14e-08	Up	AT4G24000	encodes a protein similar to cellulose synthase	CSLG2
SHI_00024469-RA	5.56094	1.85618	4.15e-08	Up	AT1G73620	Pathogenesis-related thaumatin superfamily protein	AT1G73620
SHI_00025208-RA	4.99636	5.98772	4.15e-08	Up	AT1G23130	Polyketide cyclase/dehydrase and lipid transport superfamily protein	AT1G23130
SHI_00002859-RA	3.45156	2.4864	4.2e-08	Up	AT1G44900	Encodes MCM2 (MINICHROMOSOME MAINTENANCE 2), a protein essential to embryo development. Overexpression results in altered root meristem function.	MCM2
SHI_00017387-RA	-2.17934	3.65426	4.23e-08	Down	AT4G27480	Core-2/I-branching beta-1,6-N-acetylglucosaminyltransferase family protein	AT4G27480
SHI_00030731-RA	3.54012	2.55756	4.34e-08	Up	AT1G28680	Catalyses trans-cis isomerization and lactonization in the biosynthesis of coumarins in roots.	COSY
SHI_00009422-RA	-3.48557	5.49905	4.38e-08	Down	AT5G41050	Pollen Ole e 1 allergen and extensin family protein	AT5G41050
SHI_00023889-RA	4.57154	1.37838	4.46e-08	Up	AT1G78520	Carbohydrate-binding X8 domain superfamily protein	AT1G78520
SHI_00023159-RA	7.30036	1.25379	4.52e-08	Up	AT4G05540	P-loop containing nucleoside triphosphate hydrolases superfamily protein	AT4G05540
SHI_00014225-RA	-3.83961	6.31911	4.6e-08	Down	AT2G42280	basic helix-loop-helix (bHLH) DNA-binding superfamily protein	FBH4
SHI_00015354-RA	-4.40285	5.09911	4.64e-08	Down	AT1G15410	aspartate-glutamate racemase family	AT1G15410
SHI_00022600-RA	4.48537	2.23227	4.75e-08	Up	AT4G01140	transmembrane protein, putative (DUF1191)	AT4G01140
SHI_00014964-RA	-4.07362	6.38859	4.83e-08	Down	AT1G10380	Putative membrane lipoprotein	AT1G10380
SHI_00004943-RA	3.07417	7.00553	4.87e-08	Up	AT2G47800	Encodes a plasma membrane localized ATPase transporter involved in multidrug transport. The expression of this gene is upregulated by herbicide safeners such as benoxacor, fluxofenim and fenclorim. The mRNA is cell-to-cell mobile.	ABCC4
SHI_00022550-RA	4.75684	2.23464	4.91e-08	Up	AT2G44370	Cysteine/Histidine-rich C1 domain family protein	AT2G44370
SHI_00011360-RA	3.29193	4.8857	5.02e-08	Up	AT2G38530	Involved in lipid transfer between membranes and plays a role in maintaining the integrity of the cuticle-cell wall interface. Belongs to a family of Lipid transfer proteins. Sequence similarity to other plant/Arabidopsis LPT genes but highest similarity to LPT1. Stress and pathogen-inducible motifs found in the upstream region. Expressed in flower, leaves and siliques but absent in roots. Predic…	LTP2
SHI_00019574-RA	4.95967	0.80003	5.04e-08	Up	AT3G05820	Encodes a putative plastid-targeted alkaline/neutral invertase.Expression is induced by salt, osmotic and ABA treatments. Loss of function affects mitochondrial functioning and ROS production.	INVH
SHI_00014928-RA	5.9375	2.96034	5.04e-08	Up	AT5G15230	Encodes gibberellin-regulated protein GASA4. Promotes GA responses and exhibits redox activity.	GASA4
SHI_00028960-RA	-2.3854	5.55001	5.04e-08	Down	AT2G35660	Encodes a member of a novel gene family with homology to known proteins involved in hydroxylation and oxidation of an aromatic ring.	CTF2A
SHI_00006711-RA	2.05027	3.92132	5.09e-08	Up	AT5G18310	ubiquitin hydrolase	AT5G18310
SHI_00016285-RA	3.26672	6.0549	5.41e-08	Up	AT2G26530	Pheromone receptor-like protein involved in the early elicitor signaling events which occur within minutes and include ion fluxes across the plasma membrane, activation of MPKs and the formation of ROS related to PGPS1 and WRKY33.	AR781
SHI_00017054-RA	-2.48718	5.12644	5.43e-08	Down	AT1G51940	Encodes a LysM-containing receptor-like kinase. Induction of chitin-responsive genes by chitin treatment is not blocked in the mutant. Based on protein sequence alignment analysis, it has a typical RD signaling domain in its catalytic loop and possesses autophosphorylation activity.It is required for the suppression of defense responses in absence of pathogen infection or upon abscisic acid treat…	LYK3
SHI_00006173-RA	5.26831	2.03849	5.47e-08	Up	AT5G24110	member of WRKY Transcription Factor	WRKY30
SHI_00009215-RA	2.39764	5.88816	5.47e-08	Up	AT1G31130	polyadenylate-binding protein 1-B-binding protein	AT1G31130
SHI_00022355-RA	2.5725	5.67622	5.53e-08	Up	AT5G09500	Ribosomal protein S19 family protein	AT5G09500
SHI_00028169-RA	3.3703	2.72123	5.73e-08	Up	AT4G39010	Cellulase involved in cell wall modification during valve dehiscence.	GH9B18
SHI_00009062-RA	2.78129	4.38632	5.97e-08	Up	AT2G31730	basic helix-loop-helix (bHLH) DNA-binding superfamily protein	AT2G31730
SHI_00030719-RA	4.26986	1.69967	6.08e-08	Up	AT4G14140	This gene is predicted to encode a DNA methyltransferase. A plant line expressing an RNAi construct directed against DMT2 has reduced agrobacterium-mediated tumor formation.	DMT2
SHI_00005107-RA	-2.12898	4.74757	6.11e-08	Down	AT1G08210	Eukaryotic aspartyl protease family protein	AT1G08210
SHI_00021108-RA	3.2554	1.87121	6.2e-08	Up	AT4G28250	putative beta-expansin/allergen protein. Naming convention from the Expansin Working Group (Kende et al, 2004. Plant Mol Bio). Involved in the formation of nematode-induced syncytia in roots of Arabidopsis thaliana.	EXPB3
SHI_00017393-RA	2.42084	3.68457	6.4e-08	Up	AT4G21570	organic solute transporter ostalpha protein (DUF300)	AT4G21570
SHI_00022385-RA	3.05678	2.05888	6.46e-08	Up	AT3G22910	ATPase E1-E2 type family protein / haloacid dehalogenase-like hydrolase family protein	ACA13
SHI_00006487-RA	-3.67287	6.84014	6.67e-08	Down	AT3G16360	Encodes AHP4, a histidine-containing phosphotransmitter involved in Histidine (His)-to-Aspartate (Asp) phosphorelay signal transduction. AHP4 is one of the six Arabidopsis thaliana histidine phosphotransfer proteins (AHPs). AHPs function as redundant positive regulators of cytokinin signaling. Members of the AHP gene family include: AT3G21510 (AHP1), AT3G29350 (AHP2), AT5G39340 (AHP3), AT3G16360 …	AHP4
SHI_00013844-RA	3.76893	3.31498	6.86e-08	Up	AT2G37450	nodulin MtN21-like transporter family protein	UMAMIT13
SHI_00003169-RA	3.07253	6.01451	7.23e-08	Up	AT3G46980	Encodes an inorganic phosphate transporter (PHT4	PHT4;3
SHI_00018930-RA	2.58185	6.43344	7.33e-08	Up	AT4G30190	Belongs to the P-type ATPase superfamily of cation-transporting ATPases, pumps protons out of the cell, generating a proton gradient that drives the active transport of nutrients by proton symport. has two autoinhibitory regions within the C-terminal domain. Its plasma membrane localization is light-dependent.	+
SHI_00024778-RA	-3.64786	5.54616	7.4e-08	Down	AT1G57780	heavy-metal-associated domain-containing protein	AT1G57780
SHI_00028803-RA	3.71539	4.84759	7.46e-08	Up	AT1G73830	Encodes the brassinosteroid signaling component BEE3 (BR-ENHANCED EXPRESSION 3). Positively modulates the shade avoidance syndrome in Arabidopsis seedlings.	BEE3
SHI_00005375-RA	2.66969	5.98859	8.05e-08	Up	AT2G22830	squalene epoxidase 2	SQE2
SHI_00011958-RA	3.54486	1.12512	8.12e-08	Up	AT1G34460	B1 type cyclin	CYCB1;5
SHI_00030308-RA	5.54991	3.68055	8.24e-08	Up	AT5G52050	MATE efflux family protein	DTX50
SHI_00011493-RA	3.36316	5.22321	8.29e-08	Up	AT2G25000	Pathogen-induced transcription factor. Forms protein complexes with itself and with WRKY40. Coexpression with WRKY18 or WRKY40 made plants more susceptible to both P. syringae and B. cinerea. WRKY18, WRKY40, and WRKY60 have partially redundant roles in response to the hemibiotrophic bacterial pathogen Pseudomonas syringae and the necrotrophic fungal pathogen Botrytis cinerea, with WRKY18 playing …	WRKY60
SHI_00000804-RA	3.79501	1.91703	8.32e-08	Up	AT1G12630	encodes a member of the DREB subfamily A-4 of ERF/AP2 transcription factor family. The protein contains one AP2 domain. There are 17 members in this subfamily including TINY.	AT1G12630
SHI_00007008-RA	3.69408	6.15425	8.72e-08	Up	AT5G64250	Aldolase-type TIM barrel family protein	AT5G64250
SHI_00001811-RA	4.97718	0.680472	8.72e-08	Up	AT3G16030	lectin protein kinase family protein	CES101
SHI_00004739-RA	2.89289	2.66617	9.28e-08	Up	AT4G39380	TSL-kinase interacting-like protein	AT4G39380
SHI_00016199-RA	-3.99046	2.65044	9.3e-08	Down	AT5G38030	MATE transporter involved in auxin homeostasis in roots.	DTX30
SHI_00011826-RA	2.06367	5.08506	9.68e-08	Up	AT1G07770	Encodes cytoplasmic ribosomal protein S15a.	RPS15A
SHI_00027758-RA	6.29084	1.97337	9.86e-08	Up	AT2G43820	Encodes a nicotinate-O-glycosyltransferase. Induced by Salicylic acid, virus, fungus and bacteria. Also involved in the tryptophan synthesis pathway. Independent of NPR1 for their induction by salicylic acid. UGT74F1 transfers UDP:glucose to salicylic acid (forming a glucoside (SAG) and a glucose ester (SGE)), benzoic acid, and anthranilate in vitro. UGT74F2 shows a weak ability to catalyze the f…	UGT74F2
SHI_00001294-RA	-4.65954	1.59006	1e-07	Down	AT5G20635	Encodes an atypical heterotrimeric G-protein gamma-subunit involved in guard cell K+-channel regulation and morphological development.	AGG3
SHI_00004826-RA	3.0404	4.11941	1e-07	Up	AT5G10230	Encodes a calcium-binding protein annexin (AnnAt7).	ANNAT7
SHI_00010522-RA	2.77098	5.30871	1.01e-07	Up	AT1G61580	R-protein L3 B	RPL3B
SHI_00016143-RA	3.27889	6.09974	1.02e-07	Up	AT3G48180	CDP-diacylglycerol-glycerol-3-phosphate 3-phosphatidyltransferase	AT3G48180
SHI_00005755-RA	3.11855	3.9436	1.02e-07	Up	AT3G27300	glucose-6-phosphate dehydrogenase 5	G6PD5
SHI_00022594-RA	8.04465	6.23351	1.02e-07	Up	AT2G43620	Chitinase family protein	AT2G43620
SHI_00004627-RA	-2.36367	4.79627	1.02e-07	Down	AT4G37250	Leucine-rich repeat protein kinase family protein	AT4G37250
SHI_00025551-RA	4.38845	2.48144	1.02e-07	Up	AT3G23010	receptor like protein 36	RLP36
SHI_00008050-RA	7.37384	7.89838	1.05e-07	Up	AT4G31940	The gene encodes a cytochrome P450 enzyme, CYP82C. It is involved in the early Fe deficiency response.CYP82C4 hydroxylates fraxetin to generate sideretin (5-hydroxyfraxetin). Fraxetin and sideretin are catecholic coumarins secreted into the rhizosphere under conditions of low iron availability and help mobilize this nutrient from insoluble iron(III) pools in the soil.The mRNA is cell-to-cell mobi…	CYP82C4
SHI_00020192-RA	2.98124	2.29675	1.06e-07	Up	AT3G03700	Plasma-membrane choline transporter family protein	AT3G03700
SHI_00005290-RA	5.98554	0.717576	1.06e-07	Up	AT2G15780	Cupredoxin superfamily protein	AT2G15780
SHI_00025241-RA	2.30326	7.38395	1.06e-07	Up	AT3G09680	Ribosomal protein S12/S23 family protein	AT3G09680
SHI_00029225-RA	6.52307	7.22272	1.09e-07	Up	AT1G17860	Member of Kunitz trypsin inhibitor (KTI) family involved in plant defense response against spider mites.	ATKTI5
SHI_00003712-RA	2.03477	5.3381	1.09e-07	Up	AT5G63400	encodes a protein similar to adenylate kinase.	ADK1
SHI_00020534-RA	4.05789	4.35047	1.1e-07	Up	AT2G31180	Member of the R2R3 factor gene family.	MYB14
SHI_00000509-RA	-2.89568	4.60429	1.12e-07	Down	AT1G78995	hypothetical protein	AT1G78995
SHI_00026584-RA	3.74232	1.73972	1.12e-07	Up	AT5G41680	Protein kinase superfamily protein	AT5G41680
SHI_00011209-RA	4.13901	0.770789	1.12e-07	Up	AT5G58280	AP2/B3-like transcriptional factor family protein	AT5G58280
SHI_00000555-RA	2.20183	6.82467	1.13e-07	Up	AT3G11940	One of two genes encoding the ribosomal protein S5. Mutants have semi-dominant developmental phenotypes. Most cell-division processes are delayed or disturbed in the heterozygous mutant, and development is completely arrested at an early embryonic stage in the homozygous mutant.	RPS5A
SHI_00029694-RA	-2.22026	4.69497	1.16e-07	Down	AT1G09790	COBRA-like protein 6 precursor	COBL6
SHI_00007180-RA	3.38877	2.32256	1.22e-07	Up	AT5G67260	Encode CYCD3	CYCD3;2
SHI_00005788-RA	-3.16714	4.44918	1.26e-07	Down	AT3G01910	Encodes a homodimeric Mo-enzyme with molybdopterin as organic component of the molybdenum cofactor. It lacks the heme domain that other eukaryotic Mo-enzymes possess and has no redox-active centers other than the molybdenum. SO protein has been found in all parts of the plant. The plant SO combines its enzymatic sulfite oxidation with a subsequent nonenzymatic step using its reaction product H2O2…	SOX
SHI_00028591-RA	2.58759	4.27182	1.33e-07	Up	AT2G18470	Proline-rich extensin-like receptor kinase 4. Functions at an early stage of ABA signalling inhibiting primary root cell elongation by perturbing Ca2+ homeostasis.	PERK4
SHI_00020798-RA	2.56898	3.64665	1.33e-07	Up	AT5G49520	Encodes WRKY48, a member of the WRKY Transcription Factor. WRKY48 is a stress- and pathogen-induced transcriptional activator that represses plant basal defense. The mRNA is cell-to-cell mobile.	WRKY48
SHI_00008550-RA	4.52103	5.16337	1.34e-07	Up	AT5G42650	Encodes a member of the cytochrome p450 CYP74 gene family that functions as an allene oxide synthase. This enzyme catalyzes dehydration of the hydroperoxide to an unstable allene oxide in the JA biosynthetic pathway. It shows a dual catalytic activity, the major one being a 13-AOS but also expressing a 9-AOS activity. CFA-Leu, CFA-Val, CFA-Met and CFA-Ala can induce the expression of AOS.	AOS
SHI_00004559-RA	-2.86648	4.7691	1.36e-07	Down	AT1G11700	senescence regulator (Protein of unknown function, DUF584)	AT1G11700
SHI_00002483-RA	3.98366	1.47501	1.37e-07	Up	AT3G56060	Glucose-methanol-choline (GMC) oxidoreductase family protein	AT3G56060
SHI_00028903-RA	3.59781	4.47023	1.39e-07	Up	AT5G04080	cysteine-rich TM module stress tolerance protein	ATHCYSTM12
SHI_00000137-RA	4.67541	1.58569	1.39e-07	Up	AT1G66760	MATE efflux family protein	AT1G66760
SHI_00017737-RA	3.29516	2.63648	1.43e-07	Up	AT2G39700	putative expansin. Naming convention from the Expansin Working Group (Kende et al, 2004. Plant Mol Bio). Involved in the formation of nematode-induced syncytia in roots of Arabidopsis thaliana.	EXPA4
SHI_00024347-RA	3.40591	0.945318	1.43e-07	Up	AT2G35910	RING/U-box superfamily protein	ATL70
SHI_00023949-RA	-3.05764	6.78407	1.44e-07	Down	AT3G15095	Encodes HCF243 (high chlorophyll fluorescence), a chloroplast-localized protein involved in the D1 protein stability of the photosystem II complex1.	HCF243
SHI_00019271-RA	3.50614	5.8449	1.44e-07	Up	AT4G37260	Member of the R2R3 factor gene family. The mRNA is cell-to-cell mobile.	MYB73
SHI_00022488-RA	4.41537	2.50631	1.45e-07	Up	AT5G09800	ARM repeat superfamily protein	AT5G09800
SHI_00016198-RA	-4.2133	1.4118	1.49e-07	Down	AT1G12950	root hair specific 2	RHS2
SHI_00028525-RA	4.04676	0.866235	1.52e-07	Up	AT3G42660	Ctf4 related nuclear protein. Interacts with LHP1-PRC2 to maintain H3K27 methylation in rapidly dividing cells. EOL1 expression is restricted to rapidly dividing cells.	EOL1
SHI_00030397-RA	4.6242	2.27472	1.56e-07	Up	AT2G44190	Encodes a novel microtubule binding protein that preferentially associates with nuclear microtubules during mitosis and is essential during the mitotic and cytokinetic stages that generate the endosperm and embryo.	EDE1
SHI_00007984-RA	5.59604	0.745347	1.6e-07	Up	AT1G79150	binding protein	NOC3
SHI_00030725-RA	5.4865	1.43378	1.61e-07	Up	AT3G58550	Bifunctional inhibitor/lipid-transfer protein/seed storage 2S albumin superfamily protein	LTPG22
SHI_00020301-RA	-2.34163	5.85867	1.68e-07	Down	AT5G20400	encodes a protein whose sequence is similar to flavanone 3 hydroxylase from Malus. The mRNA is cell-to-cell mobile.	AT5G20400
SHI_00002394-RA	4.63632	1.52402	1.74e-07	Up	AT5G14060	lysine-sensitive aspartate kinase	CARAB-AK-LYS
SHI_00017767-RA	2.47721	4.87913	1.75e-07	Up	AT1G01120	Encodes a condensing enzyme KCS1 (3-ketoacyl-CoA synthase 1) which is involved in the critical fatty acid elongation process in wax biosynthesis.	KCS1
SHI_00029089-RA	3.1833	4.0738	1.76e-07	Up	AT3G28380	P-glycoprotein 17	ABCB17
SHI_00022136-RA	2.97981	4.43583	1.78e-07	Up	AT5G16350	O-acyltransferase (WSD1-like) family protein	AT5G16350
SHI_00006043-RA	3.87573	5.48071	1.78e-07	Up	AT2G41180	VQ motif-containing protein	SIB2
SHI_00010865-RA	-3.48824	3.73643	1.79e-07	Down	AT5G06570	alpha/beta-Hydrolases superfamily protein	AT5G06570
SHI_00022596-RA	-2.62375	2.82624	1.79e-07	Down	AT5G42360	Galactose oxidase/kelch repeat superfamily protein	CFK2
SHI_00020538-RA	5.25003	5.66174	1.8e-07	Up	AT1G59670	Encodes glutathione transferase belonging to the tau class of GSTs. Naming convention according to Wagner et al. (2002).	GSTU15
SHI_00027402-RA	3.31579	3.0841	1.81e-07	Up	AT5G17390	Adenine nucleotide alpha hydrolases-like superfamily protein	AT5G17390
SHI_00011769-RA	5.8372	3.66016	1.81e-07	Up	AT1G08230	Codes for a H+-driven, high affinity gamma-aminobutyric acid (GABA) transporter. Localized at the plasma membrane. In planta, AtGAT1 expression was highest in flowers and under conditions of elevated GABA concentrations such as wounding or senescence.	AT1G08230
SHI_00015545-RA	-3.63226	6.16365	1.81e-07	Down	AT3G13100	member of MRP subfamily	ABCC7
SHI_00017873-RA	-2.49073	4.39435	1.82e-07	Down	AT1G63020	Encodes one of two alternative largest subunits of a putative plant-specific RNA polymerase IV (aka RNA polymerase D). Required for posttranscriptional gene silencing.	NRPD1A
SHI_00008117-RA	3.29035	0.910572	1.93e-07	Up	AT4G23930	Late embryogenesis abundant (LEA) hydroxyproline-rich glycoprotein family	AT4G23930
SHI_00002367-RA	2.07058	6.88267	1.95e-07	Up	AT5G40760	Encodes a cytosolic glucose-6-phosphate dehydrogenase that is insensitive to reduction by DTT and whose mRNA is expressed ubiquitously. The mRNA is cell-to-cell mobile.	G6PD6
SHI_00009967-RA	7.50551	3.39961	1.95e-07	Up	AT5G38020	encodes a protein whose sequence is similar to SAM:salicylic acid carboxyl methyltransferase (SAMT) (GI:6002712)(Clarkia breweri) and to SAM:benzoic acid carboxyl methyltransferase (BAMT)(GI:9789277)(Antirrhinum majus). SABATH family methyltransferase.	AT5G38020
SHI_00026327-RA	4.78779	0.82696	1.96e-07	Up	AT3G61040	encodes a protein with cytochrome P450 domain	CYP76C7
SHI_00013777-RA	2.4437	4.72596	2e-07	Up	AT2G36880	methionine adenosyltransferase 3	MAT3
SHI_00010466-RA	5.77266	0.58984	2.01e-07	Up	AT5G48000	Encodes a member of the CYP708A family of cytochrome P450 enzymes. THAH appears to add a hydroxyl group to the triterpene thalianol. thah1 mutants have an elevated accumulation of thalianol. thah1-1 mutants have longer roots than wild type plants. Thalian-diol and desaturated thalian-diol are lost from the root extracts of thah1-1 mutants. Overexpression of the sequence from At5g48000.1 rescues t…	CYP708A2
SHI_00004917-RA	-6.59548	9.92674	2.01e-07	Down	AT2G47880	Encodes a member of the CC-type glutaredoxin (ROXY) family. CEPD2 is a non secreted polypeptide that is highly similar to CEPD1 which is another member of a novel family related to glutaredoxins. It is induced by nitrogen starvation. It acts downstream of the CEP1 peptide in systemic N-demand signalling .The RNA is expressed in the phloem of cotelydon and leaf vasculature but the peptide is graft…	CEPD2
SHI_00022757-RA	3.75931	2.15811	2.03e-07	Up	AT2G31230	encodes a member of the ERF (ethylene response factor) subfamily B-3 of ERF/AP2 transcription factor family. The protein contains one AP2 domain. There are 18 members in this subfamily including ATERF-1, ATERF-2, AND ATERF-5.	ERF15
SHI_00024093-RA	3.66227	1.47346	2.04e-07	Up	AT1G50240	The FUSED (FU) gene belongs to Ser/Thr protein kinase family and has a key role in the hedgehog signaling pathway known to control cell proliferation and patterning in fruit flies and humans . Arabidopsis thaliana genome has a single Fu gene that is involved in male meiosis cytokinesis. Cytokinesis-defective mutants, named two-in-one (tio), result from mutations in Arabidopsis Fu. Phenotypic anal…	FU
SHI_00013759-RA	4.24175	1.97375	2.05e-07	Up	AT2G36690	Protein belonging to the Fe-dependent 2-oxoglutarate dioxygenase superfamily, catalyzes the stereospecific hydration of GA12 to produce DHGA12, negatively regulates ABA sensitivity during germination, phototrophic establishment and seedling development.	GIM2
SHI_00017682-RA	3.97912	3.082	2.08e-07	Up	AT4G26430	one of two genes encoding subunit 6 of COP9 signalosome complex	CSN6B
SHI_00027851-RA	4.07488	1.92087	2.09e-07	Up	AT5G50360	ABA&#8208	AITR5
SHI_00009783-RA	3.88897	5.1968	2.09e-07	Up	AT5G09440	EXORDIUM like 4	EXL4
SHI_00022767-RA	3.10259	4.84881	2.1e-07	Up	AT3G23480	Cyclopropane-fatty-acyl-phospholipid synthase	AT3G23480
SHI_00010546-RA	2.26784	8.31795	2.14e-07	Up	AT1G55020	lipoxygenase, a defense gene conferring resistance Xanthomonas campestris The mRNA is cell-to-cell mobile.	LOX1
SHI_00025320-RA	-2.89966	4.1755	2.16e-07	Down	AT4G35270	Plant regulator RWP-RK family protein	NLP2
SHI_00007853-RA	-3.79152	2.54968	2.21e-07	Down	AT3G26490	Phototropic-responsive NPH3 family protein	AT3G26490
SHI_00020651-RA	3.09352	3.06733	2.22e-07	Up	AT1G55850	encodes a protein similar to cellulose synthase The mRNA is cell-to-cell mobile.	CSLE1
SHI_00013297-RA	2.48497	5.27334	2.22e-07	Up	AT2G30860	Encodes glutathione transferase belonging to the phi class of GSTs. Naming convention according to Wagner et al. (2002).	GSTF9
SHI_00029485-RA	2.49552	2.33689	2.33e-07	Up	AT1G07620	GTP-binding protein Obg/CgtA	ATOBGM
SHI_00013270-RA	-3.25439	8.4858	2.37e-07	Down	AT4G35750	SEC14 cytosolic factor family protein / phosphoglyceride transfer family protein	AT4G35750
SHI_00020897-RA	2.2468	8.29311	2.45e-07	Up	AT4G21480	Putative sugar transporter. Expressed in nematode-induced root syncytia.	STP12
SHI_00014582-RA	-3.6061	3.14106	2.51e-07	Down	AT4G37100	Pyridoxal phosphate (PLP)-dependent transferases superfamily protein	AT4G37100
SHI_00002162-RA	2.20345	3.23	2.52e-07	Up	AT3G25900	Homocysteine S-methyltransferase family protein	HMT-1
SHI_00001434-RA	5.3127	4.33121	2.61e-07	Up	AT3G17630	member of Putative Na+/H+ antiporter family	CHX19
SHI_00023569-RA	2.34256	4.25959	2.68e-07	Up	AT4G22010	SKU5 similar 4	SKS4
SHI_00021564-RA	-2.35639	7.27117	2.75e-07	Down	AT5G43700	Auxin inducible protein similar to transcription factors.	ATAUX2-11
SHI_00018117-RA	3.81335	1.04516	2.75e-07	Up	AT4G33150	This is a splice variant of the LKR/SDH locus. It encodes the monofunctional saccharopine dehydrogenase involved in lysine degradation. Another splice variant of the same LKR/SDH locus encodes a bifunctional protein which also has saccharopine dehydrogenase activity. The monofunctional SDH functions mainly to enhance the flux of lysine catabolism. Gene expression is induced by abscisic acid, jasm…	SDH
SHI_00006242-RA	-2.73	2.65804	2.75e-07	Down	AT2G44230	hypothetical protein (DUF946)	AT2G44230
SHI_00012784-RA	-2.37587	3.65255	2.87e-07	Down	AT2G30140	Encodes a putative glycosyltransferase. Regulates flowering time via FLOWERING LOCUS C.	UGT87A2
SHI_00027199-RA	4.29416	5.59758	2.87e-07	Up	AT3G14640	putative cytochrome P450	CYP72A10
SHI_00001088-RA	4.54247	0.690482	2.93e-07	Up	AT1G14750	Encodes a meiotic cyclin-like protein, distinct from all other known Arabidopsis cyclins. It is not required for meiotic DSB formation but is necessary for meiotic DSB repair via the homologous chromosome.	SDS
SHI_00030795-RA	3.94391	0.830516	2.93e-07	Up	AT2G25590	Plant Tudor-like protein	AT2G25590
SHI_00017319-RA	-2.98258	2.95691	3.03e-07	Down	AT1G78390	Encodes 9-cis-epoxycarotenoid dioxygenase, a key enzyme in the biosynthesis of abscisic acid. The expression of this gene increases during the first 6h of imbibition.	NCED9
SHI_00010941-RA	-3.5811	4.28267	3.09e-07	Down	AT2G38090	Duplicated homeodomain-like superfamily protein	AT2G38090
SHI_00028717-RA	2.19715	5.62098	3.13e-07	Up	AT5G23760	Copper transport protein family	AT5G23760
SHI_00009665-RA	3.06537	4.34101	3.19e-07	Up	AT1G76600	poly polymerase	AT1G76600
SHI_00015169-RA	3.35666	6.97202	3.19e-07	Up	AT3G18700	transmembrane protein	AT3G18700
SHI_00002215-RA	4.32957	4.15451	3.23e-07	Up	AT3G56630	member of CYP94D	CYP94D2
SHI_00023266-RA	7.01564	2.87899	3.23e-07	Up	AT1G69270	RPK1 is a leucine-rich receptor-like kinase located in the plasma membrane which is upregulated by abscisic acid, dehydration, high salt, low temperature, but not by other plant hormones. RPK1 knock-out and antisense plants show an ABA-insensitive phenotype. RPK1 plays a role in ABA-controlled cell proliferation and is a regulator of the ABA signal transduction pathway. Overexpression of the LRR …	RPK1
SHI_00016765-RA	3.79092	5.2063	3.28e-07	Up	AT3G28340	Encodes a protein with putative galacturonosyltransferase activity.	GATL10
SHI_00026968-RA	-2.15115	5.49802	3.28e-07	Down	AT1G11730	Galactosyltransferase family protein	AT1G11730
SHI_00028675-RA	4.91565	1.76093	3.3e-07	Up	AT3G22330	DEAD-box protein required for efficient group II intron splicing in mitochondria.	PMH2
SHI_00028802-RA	3.60943	2.78323	3.34e-07	Up	AT3G20060	Encodes one of two ubiquitin-conjugating enzymes belonging to the E2-C gene family (the other being UBC19). Transcript is always found in dividing cells, but also in other non-dividing cells. Protein is localized to the cytoplasm as well as to the nucleus.	UBC19
SHI_00028025-RA	5.93408	0.724733	3.37e-07	Up	AT1G35515	high response to osmotic stress 10	HOS10
SHI_00030814-RA	4.95845	0.594415	3.51e-07	Up	AT5G43890	Encodes a YUCCA-like putative flavin monooxygenase, the activation tagging mutant has increased level of IAA, increased auxin response and phenotype of auxin overproduction, rescues erecta mutant phenotype	YUC5
SHI_00003877-RA	3.5267	2.35198	3.57e-07	Up	AT1G65910	NAC domain containing protein 28	NAC028
SHI_00010966-RA	-2.45086	5.07683	3.61e-07	Down	AT3G51860	cation exchanger 3	CAX3
SHI_00030442-RA	3.07798	7.25871	3.7e-07	Up	AT5G47560	Encodes a tonoplast malate/fumarate transporter.	TDT
SHI_00023437-RA	4.86865	0.594246	3.71e-07	Up	AT1G79340	Encodes MCP2d, the predominant and constitutively expressed member of type II metacaspases (MCPs). MCP2d plays a positive regulatory role in biotic and abiotic stress-induced programmed cell death (PCD). Arabidopsis contains three type I MCP genes (MCP1a-c) and six type II MCP genes (MCP2a?f): AtMCP1a/At5g64240, AtMCP1b/At1g02170, AtMCP1c/At4g25110, AtMCP2a/At1g79310, AtMCP2b/At1g79330, AtMCP2c/A…	MC4
SHI_00015196-RA	3.01538	2.76577	3.94e-07	Up	AT5G16080	carboxyesterase 17	CXE17
SHI_00017666-RA	-2.72952	6.08707	3.95e-07	Down	AT1G07200	Encodes a member of an eight-gene family (SMAX1 and SMAX1-like) that has weak similarity to AtHSP101, a ClpB chaperonin required for thermotolerance.	SMXL6
SHI_00004362-RA	2.05235	3.75613	4.05e-07	Up	AT4G05410	Encodes a nucleolar protein with seven WD40-repeats that plays a role in embryo sac development and is critical for the correct positioning of the division plane of zygote and the apical cell lineage in Arabidopsis. YAO may act by modulating nucleolar function, such as rRNA biogenesis, during early embryogenesis and gametogenesis.	YAO
SHI_00011262-RA	2.54738	1.97061	4.12e-07	Up	AT4G04570	Encodes a cysteine-rich receptor-like protein kinase. The mRNA is cell-to-cell mobile.	RECEPTOR-LIKE PROTEIN KINASE
SHI_00011133-RA	-2.10188	6.04462	4.12e-07	Down	AT3G51950	Contains single CCCH domain.	AT3G51950
SHI_00015018-RA	4.47145	0.981451	4.2e-07	Up	AT5G62490	Part of the AtHVA22 family. Protein expression is ABA- and stress-inducible.	HVA22B
SHI_00030224-RA	3.64878	4.87456	4.22e-07	Up	AT1G03220	Eukaryotic aspartyl protease family protein	SAP2
SHI_00004178-RA	4.62291	2.93732	4.24e-07	Up	AT2G34020	Calcium-binding EF-hand family protein	AT2G34020
SHI_00009614-RA	4.83549	0.805642	4.27e-07	Up	AT4G28850	xyloglucan endotransglucosylase/hydrolase 26	XTH26
SHI_00017350-RA	2.54372	5.5519	4.33e-07	Up	AT3G14940	Encodes a cytosolic phosphoenolpyruvate carboxylase (PEPC) that has activity when expressed in E.coli. Its mRNA is most abundantly expressed in roots and siliques. PPC3 belongs to the plant-type PEPC family. It can form an enzymatically active complex with a castor bean ortholog of PPC4, which encodes a bacterial-type PEPC. The mRNA is cell-to-cell mobile.	PPC3
SHI_00013993-RA	3.30927	6.80803	4.33e-07	Up	AT5G22140	FAD/NAD(P)-binding oxidoreductase family protein	AT5G22140
SHI_00027574-RA	4.05092	2.8434	4.37e-07	Up	AT1G16120	Encodes a WAK-like receptor-like kinase with a cytoplasmic Ser/Thr protein kinase domain and an extracellular domain with EGF-like repeats.	WAKL1
SHI_00021374-RA	-2.95235	2.44756	4.45e-07	Down	AT2G44740	cyclin p4	CYCP4;1
SHI_00000925-RA	3.08494	3.30749	4.51e-07	Up	AT3G03050	encodes a cellulose synthase like protein. mutations initiate root hairs that rupture at their tip soon after initiation. is required for the synthesis of a noncellulosic wall polysaccharide.	CSLD3
SHI_00003137-RA	2.62451	5.72099	4.61e-07	Up	AT2G40590	Ribosomal protein S26e family protein	AT2G40590
SHI_00009028-RA	-2.83369	5.89559	4.68e-07	Down	AT1G26320	Zinc-binding dehydrogenase family protein	AT1G26320
SHI_00006655-RA	-2.76129	3.67842	4.69e-07	Down	AT3G02730	Encodes a type-f thioredoxin. Has a role in the short-term activation of carbon metabolism. Loss affects growth under short-day conditions.	TRXF1
SHI_00028919-RA	-2.22993	5.12096	4.69e-07	Down	AT4G30845	DNA-directed RNA polymerase subunit beta	AT4G30845
SHI_00010873-RA	2.61366	3.14557	4.89e-07	Up	AT4G35310	calmodulin-domain protein kinase CDPK isoform 5 (CPK5)	CPK5
SHI_00012517-RA	-2.04597	4.2002	5.01e-07	Down	AT1G05385	Encodes a Psb27 homolog involved in photosystem II biogenesis.	LPA19
SHI_00013257-RA	3.49591	4.51775	5.06e-07	Up	AT3G26040	HXXXD-type acyl-transferase family protein	AT3G26040
SHI_00013145-RA	4.24253	0.647401	5.07e-07	Up	AT3G14300	pectinesterase family protein	ATPMEPCRC
SHI_00027956-RA	3.31407	6.03797	5.27e-07	Up	AT2G24450	Fasciclin-like arabinogalactan protein. Possibly involved in embryogenesis and seed development.	FLA3
SHI_00024052-RA	-2.73938	2.47517	5.28e-07	Down	AT2G20550	HSP40/DnaJ peptide-binding protein	AT2G20550
SHI_00020104-RA	-3.91171	6.3654	5.44e-07	Down	AT5G54270	Lhcb3 protein is a component of the main light harvesting chlorophyll a/b-protein complex of Photosystem II (LHC II).	LHCB3
SHI_00004733-RA	4.02072	1.89577	5.49e-07	Up	AT5G64740	Encodes a cellulose synthase isomer. CESA6 mutants have cellulose defect in the primary cell wall. Multiple lines of evidence suggest that CESA6, along with CESA1 and CESA3 are present in the same plasma membrane complex for cellulose biosynthesis. CESA2 and CESA5 are related to CESA6, having partially redundant roles. As inferred from the null role of secondary wall-type CesAs, included in a set…	CESA6
SHI_00016045-RA	-2.01443	3.0181	5.7e-07	Down	AT5G38070	RING/FYVE/PHD zinc finger superfamily protein	AT5G38070
SHI_00029333-RA	-2.55565	5.07484	5.78e-07	Down	AT4G25850	OSBP(oxysterol binding protein)-related protein 4B	OXYSTEROL BINDING PROTEIN
SHI_00023623-RA	4.22602	1.67841	5.78e-07	Up	AT4G01060	Encodes a Myb-related protein similar to CPC. Involved in epidermal cell differentiation. Mutants have reduced numbers of root hairs and increased trichome branching. Involved in endoreduplication. Loss of function mutants are hypertrophic and early flowering.	CPL3
SHI_00004645-RA	3.27199	0.581641	5.8e-07	Up	AT2G32750	Exostosin family protein	AT2G32750
SHI_00009980-RA	6.23671	9.06562	5.85e-07	Up	AT1G75300	encodes a protein whose sequence is similar to an isoflavone reductase	AT1G75300
SHI_00019003-RA	-2.07045	2.77395	5.94e-07	Down	AT2G24230	Leucine-rich repeat protein kinase family protein	AT2G24230
SHI_00028059-RA	2.85889	3.58843	6.15e-07	Up	AT1G49430	Encodes a long chain acyl-CoA synthetase that catalyzes the synthesis of omega-hydroxy fatty acyl-CoA intermediates in the pathway to cutin synthesis. Required for repression of lateral root formation.	LACS2
SHI_00002234-RA	4.16392	1.35074	6.17e-07	Up	AT1G27190	Activated by TCP8/14/15/22, involved in modulation of GA-dependent stamen filament elongation.	BIR3
SHI_00028462-RA	5.73382	2.41616	6.3e-07	Up	AT1G74550	Encodes a tricoumaroylspermidine meta-hydroxylase that participates in the formation of N<sup>1</sup>,N<sup>5</sup>-di(hydroxyferuloyol)- N<sup>10</sup>-sinapoylspermidine, an important constituent of pollen. This gene appears to be expressed in young flower buds and inflorescence tips with notably high levels of expression in the tapetum and pollen. It is also expressed in root tips.	CYP98A9
SHI_00030348-RA	2.06576	5.76282	6.37e-07	Up	AT2G32220	Ribosomal L27e protein family	AT2G32220
SHI_00021438-RA	-2.04356	3.47166	6.5e-07	Down	AT3G61590	F-box protein that is involved in some aspect of regulation of gene silencing by miRNA. Loss of function mutations have increased levels of some miRNAs. Its activity depends on the presence of functional F-box.	HWS
SHI_00018901-RA	-2.78107	6.2954	6.57e-07	Down	AT1G07450	NAD(P)-binding Rossmann-fold superfamily protein	AT1G07450
SHI_00015176-RA	-3.08359	2.92119	6.67e-07	Down	AT1G26100	Cytochrome b561/ferric reductase transmembrane protein family	AT1G26100
SHI_00000207-RA	2.7029	4.51607	6.77e-07	Up	AT5G37490	ARM repeat superfamily protein	AT5G37490
SHI_00013117-RA	2.1105	4.62695	6.97e-07	Up	AT1G54100	Aldehyde dehydrogenase	ALDH7B4
SHI_00001670-RA	6.45031	2.66391	7.01e-07	Up	AT1G15460	Encodes a efflux-type boron transporter. Over-expression improved plant growth under B toxic conditions.	BOR4
SHI_00024887-RA	3.77435	0.934067	7.02e-07	Up	AT5G61000	Replication factor-A protein 1-like protein	RPA70D
SHI_00011569-RA	3.75498	4.20933	7.07e-07	Up	AT3G62710	Glycosyl hydrolase family protein	AT3G62710
SHI_00030543-RA	6.60508	0.538046	7.11e-07	Up	AT4G05020	Miitochondrial alternative NADH dehydrogenase.	P
SHI_00022199-RA	2.72156	2.77097	7.16e-07	Up	AT2G32380	Transmembrane protein 97, Putative	AT2G32380
SHI_00000398-RA	-5.7202	0.560083	7.17e-07	Down	AT4G36470	S-adenosyl-L-methionine-dependent methyltransferases superfamily protein	AT4G36470
SHI_00017413-RA	6.95685	4.30997	7.17e-07	Up	AT5G45160	Root hair defective 3 GTP-binding protein (RHD3)	RL2
SHI_00022430-RA	-2.68155	3.15725	7.2e-07	Down	AT5G61650	The P-type cyclins (CYCPs) share a conserved central region of 100 amino acids ('cyclin box') displaying homology to the corresponding region of the PHO80 cyclin from Saccharomyces cerevisiae and the related G1 cyclins from Trypanosoma cruzi and T. brucei.	CYCP4;2
SHI_00012034-RA	-2.30882	2.87852	7.27e-07	Down	AT1G77740	Encodes PIP5K2, a phosphatidylinositol-4-phosphate 5-kinase (PtdIns(4)P 5-kinase 2	PIP5K2
SHI_00003709-RA	2.17261	3.23647	7.31e-07	Up	AT5G65710	Encodes a protein controlling the separation step of floral organ abscission.Necessary for pathogen-triggered leaf abscission.	HSL2
SHI_00010867-RA	4.6783	1.28856	7.49e-07	Up	AT2G24140	myosin-J heavy chain-like protein (Protein of unknown function, DUF593)	AT2G24140
SHI_00021903-RA	4.71536	1.09714	7.49e-07	Up	AT4G18050	P-glycoprotein 9	ABCB9
SHI_00003452-RA	2.20237	7.70584	7.54e-07	Up	AT2G36220	hypothetical protein	AT2G36220
SHI_00012488-RA	2.96492	1.77305	7.6e-07	Up	AT4G14750	Member of IQ67 (CaM binding) domain containing family.	IQD19
SHI_00007131-RA	5.06676	1.00203	7.61e-07	Up	AT1G27720	TBP-associated factor 4B	TAF4B
SHI_00009516-RA	2.5248	3.58777	7.64e-07	Up	AT5G22940	Homolog of FRA8 (AT2G28110), a member of a member of glycosyltransferase family 47	F8H
SHI_00025866-RA	2.18503	5.73595	7.65e-07	Up	AT4G12070	hypothetical protein	AT4G12070
SHI_00006668-RA	2.06138	3.30269	7.92e-07	Up	AT3G03310	lecithin:cholesterol acyltransferase 3	LCAT3
SHI_00025980-RA	4.3358	0.861838	8.07e-07	Up	AT2G38810	Encodes HTA8, a histone H2A protein. Loss of all H2A.Z (triple mutant with HTA9 and HTA11) results in a reduction in DNA methylation of transposons but not that of genes. Loss of H2A.Z causes misregulation of many genes involved in the response to developmental and environmental cues, and that these genes tend to have high levels of gene-body H2A.Z.	HTA8
SHI_00025098-RA	-2.0039	6.95149	8.22e-07	Down	AT2G35960	Encodes a protein whose sequence is similar to tobacco hairpin-induced gene (HIN1) and Arabidopsis non-race specific disease resistance gene (NDR1). Expression is not altered in response to cucumber mosaic virus or spermine.	NHL12
SHI_00027560-RA	-2.45774	5.80118	8.26e-07	Down	AT3G62040	Haloacid dehalogenase-like hydrolase (HAD) superfamily protein	AT3G62040
SHI_00017467-RA	4.27034	3.03158	8.41e-07	Up	AT3G28580	P-loop containing nucleoside triphosphate hydrolases superfamily protein	AT3G28580
SHI_00008772-RA	3.88907	7.30805	8.54e-07	Up	AT4G34131	UDP-glucosyl transferase 73B3	UGT73B3
SHI_00002395-RA	3.16932	1.92286	8.58e-07	Up	AT5G13960	Encodes a histone 3 lysine 9 specific methyltransferase involved in the maintenance of DNA methylation. SUVH4/KYP is a SU(VAR)3-9 homolog, a SET domain protein. Known SET domain proteins are involved in epigenetic control of gene expression. There are 10 SUVH genes in Arabidopsis and members of this subfamily of the SET proteins have an additional conserved SRA domain. In kyp mutants, there is a …	VAR
SHI_00013319-RA	-3.83299	3.20417	8.84e-07	Down	AT1G75620	glyoxal oxidase-related protein	AT1G75620
SHI_00003500-RA	-2.12329	4.62662	8.89e-07	Down	AT3G48020	hypothetical protein	AT3G48020
SHI_00020329-RA	5.09411	0.895923	8.98e-07	Up	AT3G15760	cytochrome P450 family protein	AT3G15760
SHI_00015036-RA	-2.54837	4.40882	8.99e-07	Down	AT1G26800	MPSR1 is cytoplasmic E3 ligase that senses misfolded proteins independently of chaperones and targets those proteins for degradation via the 26S proteasome.	MPSR1
SHI_00025830-RA	-2.98881	6.33656	9.17e-07	Down	AT5G42610	calcium uniporter (DUF607)	AT5G42610
SHI_00001870-RA	-2.58696	3.38668	9.34e-07	Down	AT2G38970	Zinc finger (C3HC4-type RING finger) family protein	AT2G38970
SHI_00007500-RA	4.4524	5.76768	9.37e-07	Up	AT1G22440	Zinc-binding alcohol dehydrogenase family protein	AT1G22440
SHI_00029221-RA	-4.95719	3.17755	9.5e-07	Down	AT1G79360	organic cation/carnitine transporter 2	45201
SHI_00007792-RA	-2.7133	4.5524	9.63e-07	Down	AT1G10350	DNAJ heat shock family protein	AT1G10350
SHI_00015031-RA	-2.30463	2.89913	9.64e-07	Down	AT3G05310	Encodes a protein with similarity to MIRO GTPases.	MIRO3
SHI_00026520-RA	10.2664	2.33819	9.71e-07	Up	AT1G14940	Polyketide cyclase/dehydrase and lipid transport superfamily protein	AT1G14940
SHI_00009312-RA	2.05759	8.48118	9.73e-07	Up	AT5G42990	ubiquitin-conjugating enzyme 18	UBC18
SHI_00003548-RA	4.08432	4.00512	9.87e-07	Up	AT5G42260	beta glucosidase 12	BGLU12
SHI_00020638-RA	3.9959	1.87923	9.99e-07	Up	AT5G56150	ubiquitin-conjugating enzyme 30	UBC30
SHI_00004817-RA	3.1557	2.43295	1.01e-06	Up	AT5G10150	SOK2 is a DUF966 domain containing protein of unknown function. Expressed in discrete domains of the PM. In root endodermis and embryo, expression is in inner basal edges and in basal	SOK2
SHI_00023742-RA	3.13541	6.22337	1.04e-06	Up	AT3G04080	Encodes an Golgi-localized integral membrane enzyme with nucleoside diphosphate activity that when mutated in combination with ATAPY2 causes a complete inhibition of pollen germination.With respect to substrate specificity, APY1 shows the following preferences UTP>IDP>GDP.	APY1
SHI_00024985-RA	5.20016	1.95832	1.04e-06	Up	AT5G62680	Encodes a high-affinity, proton-dependent glucosinolate-specific transporter that is crucial for the transport of both methionine- and tryptophan-derived glucosinolates to seeds.	NPF2.11
SHI_00006151-RA	4.56463	1.29384	1.05e-06	Up	AT5G24080	Protein kinase superfamily protein	AT5G24080
SHI_00019666-RA	5.23442	0.518418	1.06e-06	Up	AT3G05980	hypothetical protein	AT3G05980
SHI_00021392-RA	-2.075	7.22747	1.06e-06	Down	AT5G17670	alpha/beta-Hydrolases superfamily protein	AT5G17670
SHI_00014615-RA	-3.59035	3.91776	1.1e-06	Down	AT5G13290	Encodes a protein with predicted Ser/Thr kinase activity and membrane localization that is involved in the CLV3 signaling pathway that represses WUS expression in the meristem. Loss of function of CRN can suppress the phenotype caused by overexpression of CLV3. SOL2 isolated as a suppressor of root- specific overexpression of CLE19, a clavata3 like gene. sol2 partially suppresses the short root p…	CRN
SHI_00000977-RA	2.72561	6.28178	1.11e-06	Up	AT5G42110	hypothetical protein	AT5G42110
SHI_00027797-RA	5.3948	1.35528	1.12e-06	Up	AT5G17810	Encodes a WUSCHEL-related homeobox gene family member with 65 amino acids in its homeodomain. Proteins in this family contain a sequence of eight residues (TLPLFPMH) downstream of the homeodomain called the WUS box. Together with WOX11, WOX12 is involved in de novo root organogenesis.	WOX12
SHI_00011042-RA	-2.62775	3.38047	1.12e-06	Down	AT5G59320	Predicted to encode a PR (pathogenesis-related) protein. Belongs to the lipid transfer protein (PR-14) family with the following members: At2g38540/LTP1, At2g38530/LTP2, At5g59320/LTP3, At5g59310/LTP4, At3g51600/LTP5, At3g08770/LTP6, At2g15050/LTP7, At2g18370/LTP8, At2g15325/LTP9, At5g01870/LTP10, At4g33355/LTP11, At3g51590/LTP12, At5g44265/LTP13, At5g62065/LTP14, At4g08530/LTP15. The mRNA is cel…	LTP3
SHI_00001924-RA	3.45292	1.25644	1.18e-06	Up	AT1G07790	Encodes a histone 2B (H2B) protein.	HTB1
SHI_00005229-RA	-2.21523	4.71929	1.2e-06	Down	AT3G52840	beta-galactosidase 2	BGAL2
SHI_00027246-RA	4.53009	1.22003	1.21e-06	Up	AT5G48310	Protein of unknown function that may be involved in stress response. Strongly expressed in vascular tissues.Mutants are ABA- insensitive.	RASD1
SHI_00000025-RA	-2.24436	4.4965	1.21e-06	Down	AT1G26450	Carbohydrate-binding X8 domain superfamily protein	AT1G26450
SHI_00027722-RA	-2.33	2.95236	1.22e-06	Down	AT2G24000	serine carboxypeptidase-like 22	SCPL22
SHI_00018053-RA	2.43999	2.69315	1.23e-06	Up	AT5G20540	Belongs to five-member BRX gene family. Arabidopsis BRX genes share high levels of similarity among each others, with several conserved domains. The most distinct is BRX domain - highly conserved in all BRX genes among distantly related species. This protein-protein interaction domain is required and sufficient for BRX activity.	BRXL4
SHI_00012025-RA	2.54585	1.59452	1.23e-06	Up	AT1G36940	myotubularin-like protein	AT1G36940
SHI_00004256-RA	-2.00869	4.07482	1.29e-06	Down	AT1G61065	1,3-beta-glucan synthase component (DUF1218)	AT1G61065
SHI_00001526-RA	2.61916	2.53315	1.31e-06	Up	AT3G43850	hypothetical protein	AT3G43850
SHI_00002519-RA	5.75875	2.70521	1.34e-06	Up	AT5G52400	member of CYP715A	CYP715A1
SHI_00017939-RA	4.41752	0.580915	1.34e-06	Up	AT4G40070	RING/U-box superfamily protein	ATL32
SHI_00021650-RA	3.72135	0.93404	1.35e-06	Up	AT4G14310	Transducin/WD40 repeat-like superfamily protein	AT4G14310
SHI_00014995-RA	3.29206	2.0531	1.38e-06	Up	AT1G69810	member of WRKY Transcription Factor	WRKY36
SHI_00007501-RA	3.67381	1.62493	1.39e-06	Up	AT1G64710	GroES-like zinc-binding alcohol dehydrogenase family protein	AT1G64710
SHI_00013945-RA	2.09928	5.35425	1.44e-06	Up	AT2G17760	Eukaryotic aspartyl protease family protein	AT2G17760
SHI_00010637-RA	2.89501	1.68699	1.45e-06	Up	AT2G39490	F-box family protein	AT2G39490
SHI_00029548-RA	-2.59495	3.51531	1.47e-06	Down	AT3G08600	transmembrane protein, putative (DUF1191)	AT3G08600
SHI_00001342-RA	-2.11347	3.81953	1.48e-06	Down	AT4G18530	lysine ketoglutarate reductase trans-splicing-like protein, putative (DUF707)	AT4G18530
SHI_00017178-RA	2.41443	2.69202	1.51e-06	Up	AT1G53760	K+-H+ exchange-like protein	AT1G53760
SHI_00011764-RA	-2.98565	1.71795	1.52e-06	Down	AT1G49405	Uncharacterized protein family (UPF0497)	CASPL5C3
SHI_00028834-RA	2.53909	5.09452	1.53e-06	Up	AT5G13700	Encodes a protein with polyamine oxidase activity. The mRNA of this gene is only expressed in very low amounts in the organs where it was detected (light-grown plants).	PAO1
SHI_00029843-RA	2.43681	8.48192	1.54e-06	Up	AT5G48485	Encodes a putative apoplastic lipid transfer protein that is involved in systemic acquired resistance. Mutants in this gene exhibit wild-type local resistance to avirulent and virulent Pseudomonas syringae, but pathogenesis-related gene expression is abolished in uninoculated distant leaves and fail to develop SAR to virulent Pseudomonas or Peronospora parasitica. DIR1 protein is cell-to-cell mob…	DIR1
SHI_00005911-RA	2.01993	5.85928	1.54e-06	Up	AT5G53045	transcription factor	AT5G53045
SHI_00022241-RA	-3.29634	5.00649	1.59e-06	Down	AT2G32430	Galactosyltransferase family protein	AT2G32430
SHI_00018228-RA	6.68379	1.91067	1.59e-06	Up	AT5G47220	Encodes a member of the ERF (ethylene response factor) subfamily B-3 of ERF/AP2 transcription factor family (ATERF-2). The protein contains one AP2 domain. Functions as activator of GCC box?dependent transcription. Positive regulator of JA-responsive defense genes and resistance to F. oxysporum and enhances JA inhibition of root elongation.	ERF2
SHI_00028387-RA	3.55688	5.13891	1.61e-06	Up	AT3G57150	Encodes a putative pseudouridine synthase (NAP57).	NAP57
SHI_00027527-RA	4.39728	3.39658	1.61e-06	Up	AT1G25400	transmembrane protein	AT1G25400
SHI_00007068-RA	4.32664	4.60622	1.61e-06	Up	AT2G02850	Encodes plantacyanin one of blue copper proteins. Involved in anther development and pollination. Expressed in the transmitting tract of the pistil.	ARPN
SHI_00025360-RA	-4.39914	5.17343	1.66e-06	Down	AT2G21220	SAUR-like auxin-responsive protein family	SAUR12
SHI_00029857-RA	2.88073	4.51029	1.67e-06	Up	AT4G05100	Member of the R2R3 factor gene family.	MYB74
SHI_00010472-RA	4.49927	2.08792	1.67e-06	Up	AT3G04570	AT-hook motif nuclear-localized protein 19	AHL19
SHI_00025036-RA	-3.20841	0.838432	1.69e-06	Down	AT1G23980	RING/U-box superfamily protein	ATL47
SHI_00026214-RA	4.24807	0.942323	1.71e-06	Up	AT5G12460	fringe-like protein (DUF604)	AT5G12460
SHI_00020749-RA	2.31278	4.98071	1.75e-06	Up	AT3G48850	Encodes a mitochondrial phosphate transporter. Modulates plant responses to salt stress.	PHT3;2
SHI_00017683-RA	4.92494	1.23498	1.79e-06	Up	AT2G39980	HXXXD-type acyl-transferase family protein	AT2G39980
SHI_00018938-RA	4.34175	1.02842	1.79e-06	Up	AT4G25845	oxysterol-binding 4B-like protein	AT4G25845
SHI_00008659-RA	-3.4312	4.36006	1.81e-06	Down	AT5G63180	Pectin lyase-like superfamily protein	AT5G63180
SHI_00000012-RA	2.03921	3.34679	1.83e-06	Up	AT3G51790	Encodes a heme-binding protein located in the mitochondrial inner membrane that is involved in cytochrome c maturation.	G1
SHI_00022518-RA	-2.57053	7.936	1.85e-06	Down	AT1G55360	tRNA-splicing ligase (DUF239)	AT1G55360
SHI_00007403-RA	2.12044	3.06089	1.87e-06	Up	AT5G47070	Encodes a member of the RLCK VII-4 subfamily of receptor-like cytoplasmic kinases that has been shown to phosphorylate MAPKKK5 Ser-599 and MEKK1 Ser-603, both players in PRR-mediated resistance to bacterial and fungal pathogens.	PBL19
SHI_00009111-RA	-4.53952	2.94611	1.91e-06	Down	AT5G16740	Transmembrane amino acid transporter family protein	AT5G16740
SHI_00006866-RA	2.59163	6.88238	1.91e-06	Up	AT5G45260	Confers resistance to Ralstonia solanacearum. Similar to NBLS-TIR resistance genes,and also contains similarity to transcription factors. Interacts with pathogen effector protein AvrPop2.	RRS1
SHI_00015808-RA	-3.86133	5.00167	1.93e-06	Down	AT1G38065	O-fucosyltransferase family protein	AT1G38065
SHI_00004918-RA	-6.87753	5.02781	1.98e-06	Down	AT1G76750	Encodes a small cysteine-rich protein that is secreted by the egg cell during gamete interactions. The regulated secretion of EC1 by the egg cell upon sperm-egg interaction is proposed to ensure the appropriate localization of the cell-fusion machinery in distinct sperm membrane domains to accomplish gamete fusion.	EC1.1
SHI_00014740-RA	2.24925	7.78998	2.05e-06	Up	AT4G27740	Yippee family putative zinc-binding protein	AT4G27740
SHI_00004611-RA	7.19394	5.3933	2.06e-06	Up	AT5G42930	alpha/beta-Hydrolases superfamily protein	AT5G42930
SHI_00013050-RA	-3.98747	9.88751	2.11e-06	Down	AT2G30540	Encodes a member of the CC-type glutaredoxin (ROXY) family that has been shown to interact with the transcription factor TGA2.	ROXY7
SHI_00014849-RA	-2.34057	7.26332	2.17e-06	Down	AT1G70640	octicosapeptide/Phox/Bem1p (PB1) domain-containing protein	AT1G70640
SHI_00019307-RA	3.78504	1.1023	2.17e-06	Up	AT4G37540	LOB domain-containing protein 39	LBD39
SHI_00001249-RA	-2.71889	4.75041	2.17e-06	Down	AT3G48200	transmembrane protein	AT3G48200
SHI_00016168-RA	-2.45531	3.79266	2.18e-06	Down	AT1G10640	Pectin lyase-like superfamily protein	AT1G10640
SHI_00004625-RA	2.70563	6.07662	2.22e-06	Up	AT1G47056	Encodes an F-box protein. Based on genetic analysis appears to be functionally redundant with VFB2,3, and 4. When expression of all 4 genes is reduced plants show defects in growth and reduced expression of auxin response genes.	VFB1
SHI_00011713-RA	2.98737	2.7346	2.27e-06	Up	AT2G19990	Encodes a PR-1-like protein homolog that is differentially expressed in resistant compared to susceptible cultivars by powdery mildew infection. The deduced amino acid sequence has 24 amino acids comprising the signal peptide and 140 amino acids of the mature peptide (15 kDa). Northern blot analysis showed accumulation of the corresponding mRNA 12 h after inoculation of resistant barley cultivars…	PR-1-LIKE
SHI_00024148-RA	-2.54981	5.84867	2.27e-06	Down	AT5G29000	MYB-CC family member. PHL1 acts redundantly with PHR1 to regulate responses to Pi starvation.	PHL1
SHI_00014874-RA	-4.36225	3.01	2.28e-06	Down	AT1G60590	Pectin lyase-like superfamily protein	AT1G60590
SHI_00028183-RA	-4.0862	9.96659	2.3e-06	Down	AT2G21140	Proline-rich protein expressed in expanding leaves, stems, flowers, and siliques.	PRP2
SHI_00011580-RA	4.02058	1.4982	2.3e-06	Up	AT3G52450	Encodes a cytoplasmically localized U-box domain E3 ubiquitin ligase protein that is involved in the response to water stress and acts as a negative regulator of PAMP-triggered immunity.	PUB22
SHI_00002481-RA	-3.31048	5.49342	2.39e-06	Down	AT5G51810	Encodes gibberellin 20-oxidase. Involved in gibberellin biosynthesis. Up-regulated by far red light in elongating petioles. Not regulated by a circadian clock. Mutation of GA20ox2 delays flowering.	GA20OX2
SHI_00018266-RA	-2.94901	9.09367	2.41e-06	Down	AT1G32900	UDP-Glycosyltransferase superfamily protein	GBSS1
SHI_00002037-RA	7.01511	7.12508	2.44e-06	Up	AT1G70840	MLP-like protein 31	MLP31
SHI_00014387-RA	5.68008	1.60642	2.62e-06	Up	AT2G25080	Encodes glutathione peroxidase. The mRNA is cell-to-cell mobile.	GPX1
SHI_00005323-RA	3.37342	2.68827	2.63e-06	Up	AT4G37390	Encodes an IAA-amido synthase that conjugates Asp and other amino acids to auxin in vitro. Lines carrying insertions in this gene are hypersensitive to auxin. May function as a negative component in auxin signaling by regulating auxin activity.	BRU6
SHI_00010729-RA	3.18687	2.24789	2.66e-06	Up	AT3G53190	Pectin lyase-like superfamily protein	AT3G53190
SHI_00015698-RA	-2.56343	5.34003	2.78e-06	Down	AT1G21460	Nodulin MtN3 family protein	SWEET1
SHI_00012486-RA	2.1261	4.02893	2.81e-06	Up	AT4G14746	neurogenic locus notch-like protein	AT4G14746
SHI_00022570-RA	4.56986	0.560209	2.83e-06	Up	AT5G12970	Calcium-dependent lipid-binding (CaLB domain) plant phosphoribosyltransferase family protein	MCTP5
SHI_00018980-RA	3.7285	1.00218	2.87e-06	Up	AT4G30860	Encodes a member of the trxG protein family. Contains a SET domain which is known to be involved in modification of histone tails by methylation. Interacts physically with AMS, but the implications of this interaction are unknown.Overexpression results in plieotrophic developmental defects.	SDG4
SHI_00016971-RA	-7.71371	1.77393	2.89e-06	Down	AT1G26420	FAD-binding Berberine family protein	ATBBE7
SHI_00021572-RA	3.43873	3.31396	2.96e-06	Up	AT3G56800	encodes a calmodulin	CAM3
SHI_00026276-RA	3.45584	1.38085	3.08e-06	Up	AT1G51470	Encodes a myrosinase.	BGLU35
SHI_00023501-RA	3.97958	1.73277	3.12e-06	Up	AT3G13130	transmembrane protein	AT3G13130
SHI_00027147-RA	-2.27688	7.36448	3.14e-06	Down	AT1G11670	MATE efflux family protein	AT1G11670
SHI_00003077-RA	2.55538	2.60424	3.32e-06	Up	AT4G12910	serine carboxypeptidase-like 20	SCPL20
SHI_00021194-RA	2.14523	2.66989	3.36e-06	Up	AT2G25300	Encodes a hydroxyproline O-galactosyltransferase.	HPGT3
SHI_00021693-RA	-2.92002	4.17098	3.41e-06	Down	AT4G13540	ADR is a peroxisome localized, myristoylated protein. It is expressed in flowers and plays a role in suppressing ROS accumulation in anthers. Overexpression results in reduced ROS, lower levels of NST1 and NST2 and, consequently alterations in lignification of the anther endothecium resulting in male sterility.	ADR
SHI_00017362-RA	2.84516	7.793	3.44e-06	Up	AT1G53210	Encodes a Na+/Ca 2+ exchanger-like protein that participates in the maintenance of Ca 2+ homeostasis. The mRNA is cell-to-cell mobile.	NCL
SHI_00008264-RA	3.98909	4.70254	3.44e-06	Up	AT4G02600	A member of a large family of seven-transmembrane domain proteins specific to plants, homologs of the barley mildew resistance locus o (MLO) protein. The Arabidopsis genome contains 15 genes encoding MLO proteins, with localization in plasma membrane. Phylogenetic analysis revealed four clades of closely-related AtMLO genes. ATMLO1 belongs to the clade II, with ATMLO13 and ATMLO15. The gene is ex…	MLO1
SHI_00007054-RA	4.10138	4.77496	3.47e-06	Up	AT3G43630	The gene encodes nodulin-like3 whose transcript abundance was repressed under conditions of Fe-deficient growth.	AT3G43630
SHI_00007368-RA	-2.20846	10.1819	3.48e-06	Down	AT5G55120	Encodes a GDP-L-galactose phosphorylase, with similar biochemical properties as VTC2.	VTC5
SHI_00021552-RA	3.68324	7.06523	3.59e-06	Up	AT5G06870	Encodes a polygalacturonase inhibiting protein involved in plant defense response. PGIPs inhibit the activity of pectin degrading enzymes such as those produced by fungal pathogens. PGIP2 is induced by fungal infection and methyl jasmonate.Suppressed in the proton sensitive stop1-mutant, but the transcription level was recovered by transformation of STOP2. Knockout mutant showed severe damage in …	PGIP2
SHI_00015495-RA	2.71733	2.6384	3.62e-06	Up	AT3G16330	Avr9/Cf-9 rapidly elicited protein	AT3G16330
SHI_00014017-RA	-2.09868	3.54853	3.79e-06	Down	AT1G01200	RAB GTPase homolog A3	RABA3
SHI_00023317-RA	3.84093	4.50135	3.82e-06	Up	AT1G70810	Calcium-dependent lipid-binding (CaLB domain) family protein	CAR7
SHI_00019061-RA	4.62824	2.79789	3.84e-06	Up	AT2G38600	HAD superfamily, subfamily IIIB acid phosphatase	AT2G38600
SHI_00026849-RA	5.23499	1.96237	3.98e-06	Up	AT1G76470	NAD(P)-binding Rossmann-fold superfamily protein	AT1G76470
SHI_00008281-RA	-2.07302	3.68434	4.02e-06	Down	AT2G33620	AT hook motif DNA-binding family protein	AHL10
SHI_00016212-RA	2.35427	5.47628	4.03e-06	Up	AT3G26430	Encodes a functioning member of the GDS(L) lipase family with preference for long chain substrates that does not hydrolyze choline esters.	AT3G26430
SHI_00010664-RA	2.50272	1.23159	4.05e-06	Up	AT5G02970	alpha/beta-Hydrolases superfamily protein	AT5G02970
SHI_00027018-RA	3.60322	6.26241	4.15e-06	Up	AT1G61800	glucose6-Phosphate/phosphate transporter 2. Expression is upregulated in the shoot of cax1/cax3 mutant. The mRNA is cell-to-cell mobile.	GPT2
SHI_00028840-RA	3.56634	0.793609	4.24e-06	Up	AT3G58000	VQ motif-containing protein	AT3G58000
SHI_00028875-RA	5.51759	3.92998	4.4e-06	Up	AT2G34080	Cysteine proteinases superfamily protein	AT2G34080
SHI_00025916-RA	2.20683	3.2254	4.4e-06	Up	AT1G03905	P-loop containing nucleoside triphosphate hydrolases superfamily protein	ABCI19
SHI_00001341-RA	-5.43484	4.28053	4.56e-06	Down	AT1G23080	Encodes a novel component of auxin efflux that is located apically in the basal cell and is involved during embryogenesis in setting up the apical-basal axis in the embryo. It is also involved in pattern specification during root development. In roots, it is expressed at lateral and basal membranes of provascular cells in the meristem and elongation zone, whereas in the columella cells it coincid…	PIN7
SHI_00026460-RA	3.2622	1.48353	4.69e-06	Up	AT4G23720	transmembrane protein, putative (DUF1191)	AT4G23720
SHI_00005009-RA	3.06526	0.710228	4.71e-06	Up	AT3G16870	Encodes a member of the GATA factor family of zinc finger transcription factors.	GATA17
SHI_00020318-RA	-2.53201	4.65924	4.71e-06	Down	AT3G01300	Protein kinase superfamily protein	PBL35
SHI_00012167-RA	6.12306	8.29937	4.72e-06	Up	AT1G53260	hypothetical protein	AT1G53260
SHI_00007650-RA	-2.1985	3.60406	4.74e-06	Down	AT1G23140	Expression is upregulated in the shoot of cax1/cax3 mutant.	CAR8
SHI_00019747-RA	4.65112	6.77673	4.92e-06	Up	AT3G28740	Encodes a member of the cytochrome p450 family. Expression is upregulated in response to cis-jasmonate treatment. Overexpression induces synthesis of volatile compounds that affect chemical ecology and insect interactions.	CYP81D11
SHI_00002883-RA	2.85833	1.37654	4.99e-06	Up	AT3G02820	zinc knuckle (CCHC-type) family protein	AT3G02820
SHI_00006861-RA	2.44648	4.3055	5.01e-06	Up	AT1G64060	Interacts with AtrbohD gene to fine tune the spatial control of ROI production and hypersensitive response to cell in and around infection site.	RBOH F
SHI_00003805-RA	6.11194	4.41502	5.33e-06	Up	AT5G38200	Class I glutamine amidotransferase-like superfamily protein	AT5G38200
SHI_00002360-RA	-2.40595	2.96254	5.34e-06	Down	AT5G40640	transmembrane protein	AT5G40640
SHI_00004545-RA	-4.48154	3.69528	5.34e-06	Down	AT4G15870	encodes a putative terpene synthase	TS1
SHI_00023621-RA	-2.92954	7.29908	5.37e-06	Down	AT5G54770	Encodes a thiamine biosynthetic gene that has a dual function in thiamine biosynthesis and mitochondrial DNA damage tolerance. It appears to be involved in producing the thiazole portion of thiamine (vitamin B1). A crystal structure of the protein reveals that it forms a 2-ring homo-octamer. The mRNA is cell-to-cell mobile.	THI1
SHI_00001657-RA	-2.03844	3.84946	5.38e-06	Down	AT2G26910	Encodes a member of the PLEIOTROPIC DRUG RESISTANCE family of ATP binding cassette transporters. Required for the formation of a functional cuticle.	ABCG32
SHI_00028492-RA	2.22813	5.58388	5.46e-06	Up	AT5G52450	MATE efflux family protein	AT5G52450
SHI_00019693-RA	2.48013	3.36066	5.48e-06	Up	AT1G13440	The expression level of GAPC-2 is upregulated in Arabidopsis seedlings exposed to cadmium.	GAPC2
SHI_00015305-RA	4.91926	3.05025	5.56e-06	Up	AT3G21780	Encodes a protein with UDP-glucosyl transferase activity that was shown to preferentially glucosylates abscisic acid (ABA), and not its catabolites. Moreover, UGT71B6 was shown to have a strict preference for the naturally-occurring ABA enantiomer, (+)-ABA, and not its 'unnatural' relative, (-)-ABA. This is in contrast to the other identified UGT genes catalyzing the glucosylation of ABA which we…	UGT71B6
SHI_00006556-RA	2.41105	4.04205	5.56e-06	Up	AT5G51160	Ankyrin repeat family protein	AT5G51160
SHI_00001813-RA	3.1278	3.09713	5.61e-06	Up	AT1G67520	lectin protein kinase family protein	AT1G67520
SHI_00006333-RA	4.65818	0.523186	5.66e-06	Up	AT2G29120	member of Putative ligand-gated ion channel subunit family	GLR2.7
SHI_00020991-RA	4.85269	6.01934	5.71e-06	Up	AT1G17010	2-oxoglutarate (2OG) and Fe(II)-dependent oxygenase superfamily protein	AT1G17010
SHI_00015741-RA	2.55158	1.69901	5.72e-06	Up	AT5G06050	Putative methyltransferase family protein	AT5G06050
SHI_00011035-RA	5.14465	0.837951	5.9e-06	Up	AT1G06920	Encodes OFP4, a member of the plant specific ovate family proteins. Members of this family have been shown to bind to KNOX and BELL- like TALE class homeodomain proteins. OFP4 interacts with KNAT7 to regulate secondary cell wall formation.	OFP4
SHI_00001632-RA	3.54736	0.722454	5.93e-06	Up	AT4G32700	Encodes a DNA polymerase required for microhomology mediated repair of DNA double strand breaks and is required for T-DNA integration. The protein contains two conserved functional domains: an N-terminal superfamily II DNA/RNA helicase domain and a C-terminal prokaryotic-type DNA polymerase I domain. Required for regulated cell division and differentiation in meristems. Mutant plants show morphol…	TEB
SHI_00028441-RA	-3.1821	4.93267	6.37e-06	Down	AT3G09340	Transmembrane amino acid transporter family protein	AT3G09340
SHI_00028688-RA	2.79293	2.63588	6.38e-06	Up	AT5G01710	methyltransferase	AT5G01710
SHI_00005179-RA	-2.20078	8.76407	6.53e-06	Down	AT3G45780	Blue-light photoreceptor. Contains a light activated serine-threonine kinase domain and LOV1 and LOV2 repeats. Mutants are defective in blue-light response. Mediates blue light-induced growth enhancements. PHOT1 and PHOT2 mediate blue light-dependent activation of the plasma membrane H+-ATPase in guard cell protoplasts. PHOT1 undergoes blue-light-dependent autophosphorylation. At least eight phos…	PHOT1
SHI_00006606-RA	3.17715	2.81672	6.54e-06	Up	AT4G32280	indole-3-acetic acid inducible 29	IAA29
SHI_00027146-RA	2.22088	6.67078	6.6e-06	Up	AT3G21690	MATE efflux family protein	AT3G21690
SHI_00008389-RA	3.75653	1.8439	6.6e-06	Up	AT3G23890	Encodes a topoisomerase II that is highly expressed in young seedlings. The protein is localized in the nucleus and gene expression levels are increased in proliferative tissues.	TOPII
SHI_00024832-RA	2.18663	3.7623	6.89e-06	Up	AT1G73480	alpha/beta-Hydrolases superfamily protein	MAGL4
SHI_00027300-RA	2.05263	4.22793	7.12e-06	Up	AT5G21326	Ca2+regulated serine-threonine protein kinase family protein	CBL
SHI_00010240-RA	-3.51063	2.4556	7.13e-06	Down	AT1G63220	Calcium-dependent lipid-binding (CaLB domain) family protein	AT1G63220
SHI_00020902-RA	2.80479	4.43547	7.22e-06	Up	AT4G21490	NAD(P)H dehydrogenase B3	P
SHI_00006118-RA	-2.142	2.99826	7.56e-06	Down	AT5G52540	keratin-associated protein, putative (DUF819)	AT5G52540
SHI_00030337-RA	-2.10251	3.95441	7.56e-06	Down	AT4G28890	RING/U-box superfamily protein	ATL42
SHI_00016397-RA	-2.38343	4.38115	7.74e-06	Down	AT1G08070	Encodes a chloroplast RNA editing factor.	OTP82
SHI_00012326-RA	3.28193	2.23914	7.81e-06	Up	AT4G00570	Encodes an NAD-dependent malic enzyme (NAD-ME) that does not act on oxaloacetate, indicating that it belongs to EC 1.1.1.39. It is a member of the beta family of NAD-MEs in plants. It appears to function as a homodimer or as a heterodimer with the alpha-type NAD-ME2 (At2g13560). NAD-ME2 transcript and protein levels are higher during the night than during the day.	NAD-ME2
SHI_00020150-RA	2.31625	2.76497	7.82e-06	Up	AT3G48560	Catalyzes the formation of acetolactate from pyruvate, the first step in valine and isoleucine biosynthesis. Requires FAD, thiamine pyrophosphate and Mg. Inhibited by the sulphonylurea herbicide, chlorsulphuron, and the imidazolinone herbicide, imazapyr. The obtained crystal structure of acetohydroxyacid synthase AHAS, EC 2.2.1.6)in complex with herbicides of the sulphonylurea and imidazolinone f…	CSR1
SHI_00010549-RA	-2.00877	6.29107	7.87e-06	Down	AT3G05410	Photosystem II reaction center PsbP family protein	AT3G05410
SHI_00025271-RA	-2.00755	4.479	7.96e-06	Down	AT5G02750	Encodes an E3 ligase, SHOOT GRAVITROPISM9. Modulates the interaction between statoliths and F-Actin in gravity sensing.	SGR9
SHI_00028694-RA	-2.73022	5.81863	8.36e-06	Down	AT5G62140	ATP-dependent Clp protease ATP-binding subunit	AT5G62140
SHI_00030476-RA	3.17017	7.24346	8.49e-06	Up	AT4G04450	member of WRKY Transcription Factor	WRKY42
SHI_00003876-RA	3.18231	0.997961	8.54e-06	Up	AT1G65900	plant/protein	AT1G65900
SHI_00026351-RA	3.29421	2.03415	8.57e-06	Up	AT1G19190	alpha/beta-Hydrolases superfamily protein	AT1G19190
SHI_00028767-RA	2.36577	4.41445	8.77e-06	Up	AT5G21105	Plant L-ascorbate oxidase	AT5G21105
SHI_00020873-RA	5.30788	0.635973	8.77e-06	Up	AT1G06280	LOB domain-containing protein 2	LBD2
SHI_00015236-RA	-2.36635	5.59647	8.82e-06	Down	AT2G36330	Uncharacterized protein family (UPF0497)	CASPL4A3
SHI_00022383-RA	3.09045	3.23114	8.86e-06	Up	AT4G14640	encodes a divergent member of calmodulin, which is an EF-hand family of Ca2+-binding proteins. This gene is expressed in leaves, flowers and siliques. The gene functionally complements yeast calmodulin 1 (CAM1). Also the protein does not form formed a complex with a basic amphiphilic helical peptide in the presence of Ca2+ in vitro. Authors suggest that this gene may represent a Ca2+-binding sens…	CAM8
SHI_00028122-RA	-2.39932	7.45361	8.94e-06	Down	AT4G34530	Encodes a transcription factor CIB1 (cryptochrome-interacting basic-helix-loop-helix). CIB1 interacts with CRY2 (cryptochrome 2) in a blue light-specific manner in yeast and Arabidopsis cells, and it acts together with additional CIB1-related proteins to promote CRY2-dependent floral initiation. CIB1 positively regulates FT expression.	CIB1
SHI_00013711-RA	3.02984	1.36002	9e-06	Up	AT3G59320	solute carrier family 35 protein (DUF914)	AT3G59320
SHI_00026938-RA	4.52293	2.23597	9.19e-06	Up	AT2G04032	zinc transporter 7 precursor	ZIP7
SHI_00012378-RA	3.13246	7.43351	9.29e-06	Up	AT5G24530	Encodes a putative 2OG-Fe(II) oxygenase that is defense-associated but required for susceptibility to downy mildew. The mRNA is cell-to-cell mobile.	DMR6
SHI_00028010-RA	-2.61452	8.0375	9.36e-06	Down	AT1G80130	Tetratricopeptide repeat (TPR)-like superfamily protein	AT1G80130
SHI_00020637-RA	-4.03429	4.72155	9.55e-06	Down	AT1G29920	Encodes lhcb1.1 a component of the LHCIIb light harvesting complex associated with photosystem II.	CAB2
SHI_00010006-RA	2.51764	2.41105	1.01e-05	Up	AT1G75150	DNA ligase-like protein	AT1G75150
SHI_00026646-RA	2.6755	2.93657	1.02e-05	Up	AT5G05770	Encodes a WUSCHEL-related homeobox gene family member with 65 amino acids in its homeodomain. Proteins in this family contain a sequence of eight residues (TLPLFPMH) downstream of the homeodomain called the WUS box.	WOX7
SHI_00029977-RA	2.28277	2.96899	1.02e-05	Up	AT2G40550	Encodes a nuclear localized target of E2Fa-DPa, transcription factors controlling cell cycle progression. Required for sister chromatid cohesion and DNA repair.	ETG1
SHI_00019319-RA	4.1684	0.456869	1.04e-05	Up	AT1G51640	A member of EXO70 gene family, putative exocyst subunits, conserved in land plants. Arabidopsis thaliana contains 23 putative EXO70 genes, which can be classified into eight clusters on the phylogenetic tree.	EXO70G2
SHI_00008192-RA	-3.80727	4.95745	1.04e-05	Down	AT3G28040	Leucine-rich receptor-like protein kinase family protein	AT3G28040
SHI_00012557-RA	-2.1619	11.2271	1.04e-05	Down	AT5G19140	aluminum induced protein with YGL and LRDR motifs	AILP1
SHI_00030198-RA	-3.50722	1.79645	1.05e-05	Down	AT5G28470	Encodes a member of the nitrate/peptide NTR/PTR family of transporters is required for accumulation and transport of pollen-specific flavonol 3-O-sophorosides, characterized by a glycosidic &#946	FST1
SHI_00021813-RA	-2.13991	6.76502	1.05e-05	Down	AT3G47860	Encodes a chloroplastic lipocalin AtCHL. Located in thylakoid lumen. Involved in the protection of thylakoidal membrane lipids against reactive oxygen species, especially singlet oxygen, produced upon excess light. LCNP is required for sustained photoprotective energy dissipation or NPQ (qH) to occur (PMID:29233855).	CHL
SHI_00022008-RA	2.08573	7.16275	1.06e-05	Up	AT4G21120	Encodes a member of the cationic amino acid transporter (CAT) subfamily of amino acid polyamine choline transporters. Mediates efficient uptake of Lys, Arg and Glu in a yeast system. The mRNA is cell-to-cell mobile.	AAT1
SHI_00003200-RA	-3.23551	2.49985	1.08e-05	Down	AT4G34760	SAUR-like auxin-responsive protein family	SAUR50
SHI_00030164-RA	2.66831	3.05031	1.08e-05	Up	AT3G52020	serine carboxypeptidase-like 39	SCPL39
SHI_00000899-RA	3.41837	5.43569	1.08e-05	Up	AT1G32690	DUF740 family protein	AT1G32690
SHI_00019272-RA	2.96374	2.55355	1.09e-05	Up	AT3G16150	Encodes an asparaginase that catalyzes the degradation of L-asparagine to L-aspartic acid and ammonia. The mRNA is cell-to-cell mobile.	ASPGB1
SHI_00004414-RA	3.83691	0.511819	1.1e-05	Up	AT1G06660	Encodes JASON. jason mutant produces diploid male gametes leading to triploid progeny. Diploid gametes in the jason mutant are generated by a defect in male meiosis II.	JASON
SHI_00006752-RA	3.58396	1.95955	1.1e-05	Up	AT1G07900	LOB domain-containing protein 1	LBD1
SHI_00002615-RA	-3.7332	3.47292	1.1e-05	Down	AT2G26710	Encodes a member of the cytochrome p450 family that serves as a control point between multiple photoreceptor systems and brassinosteroid signal transduction. Involved in brassinolide metabolism. Mediates response to a variety of light signals including hypocotyl elongation and cotyledon expansion.	BAS1
SHI_00006812-RA	2.64131	4.94342	1.11e-05	Up	AT1G66550	member of WRKY Transcription Factor	WRKY67
SHI_00021592-RA	-2.0833	4.4279	1.12e-05	Down	AT3G22550	NAD(P)H-quinone oxidoreductase subunit, putative (DUF581)	AT3G22550
SHI_00004862-RA	4.4091	3.1963	1.12e-05	Up	AT5G65440	transmembrane protein	AT5G65440
SHI_00010213-RA	-3.22346	2.29861	1.16e-05	Down	AT2G45340	Leucine-rich repeat protein kinase family protein	AT2G45340
SHI_00006303-RA	-6.04976	2.23657	1.17e-05	Down	AT5G10580	plant/protein (Protein of unknown function, DUF599)	AT5G10580
SHI_00002308-RA	4.00744	0.968852	1.18e-05	Up	AT5G15630	Encodes a member of the COBRA family, similar to phytochelatin synthetase. Involved in secondary cell wall biosynthesis. Mutants make smaller plants with reduced levels of cellulose and cell wall sugars.	IRX6
SHI_00009104-RA	5.05928	0.725933	1.23e-05	Up	AT2G31500	member of Calcium Dependent Protein Kinase	CPK24
SHI_00000358-RA	-2.69057	12.5269	1.24e-05	Down	AT4G38970	Protein is tyrosine-phosphorylated and its phosphorylation state is modulated in response to ABA in Arabidopsis thaliana seeds.	FBA2
SHI_00012958-RA	-2.66981	3.69846	1.25e-05	Down	AT3G32047	Cytochrome P450 superfamily protein	AT3G32047
SHI_00013633-RA	3.60626	1.33366	1.26e-05	Up	AT3G11690	hypothetical protein	AT3G11690
SHI_00009347-RA	-3.00801	0.836879	1.3e-05	Down	AT5G40645	RPM1-interacting protein 4 (RIN4) family protein	AT5G40645
SHI_00003443-RA	3.79503	3.25891	1.35e-05	Up	AT3G52600	cell wall invertase 2	CWINV2
SHI_00018862-RA	-2.49165	3.30407	1.35e-05	Down	AT2G41190	Transmembrane amino acid transporter family protein	AT2G41190
SHI_00015752-RA	3.29581	0.877087	1.35e-05	Up	AT1G16980	Encodes an enzyme putatively involved in trehalose biosynthesis. The protein has a trehalose synthase (TPS)-like domain that may or may not be active but no trehalose phosphatase (TPP)-like domain.	TPS2
SHI_00008751-RA	2.96486	5.1463	1.36e-05	Up	AT2G15620	Involved in the second step of nitrate assimilation. Its expression is induced by nitrate. The mRNA is cell-to-cell mobile.	NIR1
SHI_00025629-RA	-2.33628	3.72486	1.37e-05	Down	AT1G45130	beta-galactosidase 5	BGAL5
SHI_00027165-RA	-2.51833	7.9813	1.38e-05	Down	AT2G42690	alpha/beta-Hydrolases superfamily protein	AT2G42690
SHI_00006640-RA	2.0399	2.61439	1.39e-05	Up	AT1G65295	ubiquitin carboxyl-terminal hydrolase	AT1G65295
SHI_00008505-RA	-2.78349	5.12751	1.41e-05	Down	AT1G75240	Encodes a zinc finger-homeodomain transcription factor ZHD5. Nuclear import and DNA binding of the ZHD5 transcription factor is modulated by a competitive peptide inhibitor MIF1 (AT1G74660).	HB33
SHI_00018402-RA	4.92369	8.06889	1.41e-05	Up	AT5G49480	AtCP1 encodes a novel Ca2+-binding protein, which shares sequence similarities with calmodulins. The expression of AtCP1 is induced by NaCl. The mRNA is cell-to-cell mobile.	CP1
SHI_00009673-RA	2.96567	1.05178	1.42e-05	Up	AT1G20930	Cyclin-dependent kinase, expressed in flowers and suspension cell culture, expression peaks during M phase in synchronized cultures. Required for proper organization of the shoot apical meristem and for hormone signaling. Expressed in the shoot apical meristem. Involved in regulation of the G2/M transition of the mitotic cell cycle.	CDKB2;2
SHI_00010332-RA	-2.10554	2.85177	1.42e-05	Down	AT3G53830	Regulator of chromosome condensation (RCC1) family protein	AT3G53830
SHI_00027202-RA	4.07002	1.87809	1.44e-05	Up	AT3G14680	putative cytochrome P450	CYP72A14
SHI_00022265-RA	-2.03675	6.16673	1.44e-05	Down	AT3G59050	Encodes a polyamine oxidase.	PAO3
SHI_00011026-RA	-2.41706	5.53814	1.46e-05	Down	AT3G56220	transcription regulator	AT3G56220
SHI_00004965-RA	4.45232	8.20319	1.52e-05	Up	AT4G15910	encodes a gene whose transcript level in root and leaves increases to progressive drought stress. The transcript level is also affected by changes of endogenous or exogenous abscisic acid level. It appears to be a member of plant-specific gene family that includes late embryo-abundant and zinc- IAA-induced proteins in other plants. The mRNA is cell-to-cell mobile.	DI21
SHI_00001334-RA	-2.34667	7.51323	1.56e-05	Down	AT5G58140	Membrane-bound protein serine/threonine kinase that functions as blue light photoreceptor in redundancy with PHO1. Involved in stomatal opening, chloroplast movement and phototropism. Mediates blue light-induced growth enhancements. PHOT1 and PHOT2 mediate blue light-dependent activation of the plasma membrane H+-ATPase in guard cell protoplasts. PHOT2 possesses two LOV (LOV1 and LOV2, for light-…	PHOT2
SHI_00012531-RA	3.59905	7.14439	1.56e-05	Up	AT5G26340	Encodes a protein with high affinity, hexose-specific/H+ symporter activity. The activity of the transporter appears to be negatively regulated by phosphorylation. Importantly, microarray analysis, as well as the study of the expression of this gene in mutants involved in programmed cell death (PCD) demonstrated a tight correlation between this gene's expression and PCD.	MSS1
SHI_00009879-RA	3.58297	1.25602	1.57e-05	Up	AT1G59540	Encodes a kinesin-like protein.	ZCF125
SHI_00026895-RA	4.14987	1.58591	1.57e-05	Up	AT2G42980	Eukaryotic aspartyl protease family protein	AT2G42980
SHI_00019181-RA	-3.61179	2.86165	1.58e-05	Down	AT3G25670	Leucine-rich repeat (LRR) family protein	AT3G25670
SHI_00013040-RA	-2.16131	5.12955	1.59e-05	Down	AT4G03100	Rho GTPase activating protein with PAK-box/P21-Rho-binding domain-containing protein	AT4G03100
SHI_00018239-RA	3.51758	3.50714	1.59e-05	Up	AT4G24040	Encodes a trehalase, member of Glycoside Hydrolase Family 37.	TRE1
SHI_00025233-RA	-3.51781	2.32449	1.59e-05	Down	AT5G03120	transmembrane protein	AT5G03120
SHI_00001708-RA	4.64838	0.889732	1.62e-05	Up	AT5G44620	member of CYP706A	CYP706A3
SHI_00000483-RA	2.22585	3.90093	1.63e-05	Up	AT5G14800	Delta 1-pyrroline-5-carboxylate reductase, catalyzes the final step in proline biosynthesis from glutamate and ornithine.In situ hybridization indicated that under normal growth conditions, the highest concentration of P5CR transcripts occurs in the cortical parenchyma, phloem, vascular cambium and pith parenchyma in the vicinity of the protoxylem. Single gene in Arabidopsis.	P5C
SHI_00020247-RA	-2.2216	3.08429	1.65e-05	Down	AT4G30810	serine carboxypeptidase-like 29	SCPL29
SHI_00030142-RA	-4.10724	11.1543	1.67e-05	Down	AT1G70880	Polyketide cyclase/dehydrase and lipid transport superfamily protein	AT1G70880
SHI_00006512-RA	-2.39646	11.4785	1.69e-05	Down	AT2G25940	Encodes a vacuolar processing enzyme belonging to a novel group of cysteine proteinases that is expressed in vegetative organs and is upregulated in association with various types of cell death and under stressed conditions.	ALPHA-VPE
SHI_00020276-RA	2.80184	1.59697	1.7e-05	Up	AT2G07690	Member of the minichromosome maintenance complex, involved in DNA replication initiation. Abundant in proliferating and endocycling tissues. Localized in the nucleus during G1, S and G2 phases of the cell cycle, and are released into the cytoplasmic compartment during mitosis. Binds chromatin.	MCM5
SHI_00020484-RA	4.00089	1.48807	1.72e-05	Up	AT5G24920	Encodes a member of the GDU (glutamine dumper) family proteins involved in amino acid export: At4g31730 (GDU1), At4g25760 (GDU2), At5g57685 (GDU3), At2g24762 (GDU4), At5g24920 (GDU5), At3g30725 (GDU6) and At5g38770 (GDU7).	GDU5
SHI_00021885-RA	3.85966	5.27621	1.75e-05	Up	AT4G18970	GDSL-motif esterase/acyltransferase/lipase. Enzyme group with broad substrate specificity that may catalyze acyltransfer or hydrolase reactions with lipid and non-lipid substrates.	AT4G18970
SHI_00006729-RA	-3.59567	5.63742	1.79e-05	Down	AT2G44210	carboxyl-terminal peptidase (DUF239)	AT2G44210
SHI_00006538-RA	-3.15425	4.49192	1.79e-05	Down	AT4G33040	Encodes a member of the CC-type glutaredoxin (ROXY) family that has been shown to interact with the transcription factor TGA2.	ROXY21
SHI_00018192-RA	3.80815	6.47826	1.81e-05	Up	AT2G02100	Predicted to encode a PR (pathogenesis-related) protein. Belongs to the plant defensin (PDF) family with the following members: At1g75830/PDF1.1, At5g44420/PDF1.2a, At2g26020/PDF1.2b, At5g44430/PDF1.2c, At2g26010/PDF1.3, At1g19610/PDF1.4, At1g55010/PDF1.5, At2g02120/PDF2.1, At2g02100/PDF2.2, At2g02130/PDF2.3, At1g61070/PDF2.4, At5g63660/PDF2.5, At2g02140/PDF2.6, At5g38330/PDF3.1 and At4g30070/PDF…	LCR69
SHI_00014925-RA	2.46902	1.60556	1.83e-05	Up	AT1G10520	Encodes a homolog of the mammalian DNA polymerase lambda that is involved in the repair of UV-B induced DNA damage.	POL{LAMBDA}
SHI_00018074-RA	2.25819	5.52732	1.91e-05	Up	AT2G05920	Subtilase family protein	SBT1.8
SHI_00027460-RA	-3.1466	3.55855	1.92e-05	Down	AT1G14280	Encodes phytochrome kinase substrate 2. PKS proteins are critical for hypocotyl phototropism. Forms a complex with Phot1, Phot2 and NPH3.	PKS2
SHI_00016651-RA	-3.04975	2.12154	1.93e-05	Down	AT3G29370	Encodes a atypical member of the bHLH (basic helix-loop-helix) family transcriptional factors.	P1R3
SHI_00001025-RA	2.10014	3.62501	1.97e-05	Up	AT2G02220	Encodes a protein interacting with phytosulfokine, a five amino acid sulfated peptide (YIYTQ). Contains dual guanylate cyclase and kinase catalytic activities that operate in vivo.	PSKR1
SHI_00028258-RA	2.48849	7.03003	1.97e-05	Up	AT4G38580	putative farnesylated protein (At4g38580) mRNA, complete	FP6
SHI_00024107-RA	3.0371	0.813637	1.97e-05	Up	AT5G16250	transmembrane protein	AT5G16250
SHI_00023591-RA	2.38145	5.69996	1.97e-05	Up	AT3G20410	calmodulin-domain protein kinase CDPK isoform 9 (CPK9)	CPK9
SHI_00015447-RA	2.70414	1.02152	2.05e-05	Up	AT1G79890	RAD3-like DNA-binding helicase protein	AT1G79890
SHI_00012169-RA	4.29185	5.08688	2.1e-05	Up	AT3G18710	Encodes a protein containing a U-box and an ARM domain. This protein has E3 ubiquitin ligase activity based on in vitro assays.	PUB29
SHI_00009591-RA	2.22894	3.45185	2.16e-05	Up	AT5G43870	FORKED-LIKE family member, part of Group 1 (FKD1, FL1-FL3	FL1
SHI_00027167-RA	2.78889	6.46675	2.22e-05	Up	AT1G06250	alpha/beta-Hydrolases superfamily protein	AT1G06250
SHI_00019614-RA	-2.04105	6.77193	2.4e-05	Down	AT5G13730	Encodes sigma 4 factor, involved in regulating the activity of the plastid-encoded RNA polymerase PEP. Regulates the overall quantity of NDH complexes and thus influences NDH activity.	SIG4
SHI_00005187-RA	4.669	0.688689	2.49e-05	Up	AT3G46280	kinase-like protein	AT3G46280
SHI_00019029-RA	2.56425	2.37494	2.54e-05	Up	AT2G17180	Target promoter of the male germline-specific transcription factor DUO1.	DAZ1
SHI_00003492-RA	-2.66791	6.98024	2.55e-05	Down	AT5G62840	Phosphoglycerate mutase family protein	AT5G62840
SHI_00021010-RA	2.07829	4.48793	2.56e-05	Up	AT2G34510	Protein of unknown function, DUF642. Found in cellulose enriched cell wall fractions.	ATHB-1
SHI_00016860-RA	-2.28596	6.73415	2.59e-05	Down	AT5G67385	Phototropic-responsive NPH3 family protein	NCH1
SHI_00009432-RA	3.35031	0.784755	2.59e-05	Up	AT3G01970	member of WRKY Transcription Factor	WRKY45
SHI_00009393-RA	-2.3069	8.21649	2.67e-05	Down	AT5G19855	Encodes a chloroplast stromal localized RbcX protein that acts as a chaperone in the folding of Rubisco.	RBCX2
SHI_00021674-RA	2.39722	1.23238	2.7e-05	Up	AT4G26970	Encodes an aconitase that can catalyze the conversion of citrate to isocitrate through a cis-aconitate intermediate, indicating that it may participate in the TCA cycle and other primary metabolic pathways. The protein is believed to accumulate in the mitochondria and the cytosol. It affects CSD2 (At2g28190 - a superoxide dismutase) transcript levels and may play a role in the response to oxidati…	ACO2
SHI_00013016-RA	-2.5209	6.21796	2.75e-05	Down	AT5G60770	member of High affinity nitrate transporter family	NRT2.4
SHI_00007893-RA	3.06477	1.80342	2.78e-05	Up	AT4G12000	SNARE associated Golgi protein family	AT4G12000
SHI_00004610-RA	-2.43115	3.22841	2.78e-05	Down	AT4G36970	Remorin family protein	AT4G36970
SHI_00014771-RA	2.08063	4.13861	2.8e-05	Up	AT3G55810	Pyruvate kinase family protein	AT3G55810
SHI_00017895-RA	-2.367	2.36034	2.89e-05	Down	AT4G11660	member of Heat Stress Transcription Factor (Hsf) family	AT-HSFB2B
SHI_00020414-RA	2.00066	4.74486	2.89e-05	Up	AT4G29520	SES1 is an ER localized chaperone involved in salt and heat stress response.	SES1
SHI_00010450-RA	3.19971	0.965286	2.89e-05	Up	AT1G64620	Dof-type zinc finger DNA-binding family protein	DOF1.8
SHI_00030306-RA	-2.54437	1.11146	2.9e-05	Down	AT4G23020	hypothetical protein	TRM11
SHI_00027284-RA	4.26739	0.991854	2.95e-05	Up	AT4G21070	Encodes AtBRCA1, an ortholog of the human breast cancer susceptibility gene 1. Contains one N-terminal RING finger, two C-terminal BRCT and the p300/CBP interacting domain. Strongly induced by gamma rays, consistent with a putative role in DNA repair and in cell cycle control.	BRCA1
SHI_00001602-RA	-4.4247	1.75169	2.96e-05	Down	AT2G25770	Polyketide cyclase/dehydrase and lipid transport superfamily protein	AT2G25770
SHI_00026291-RA	-5.73956	0.633196	3.02e-05	Down	AT4G34250	Encodes KCS16, a member of the 3-ketoacyl-CoA synthase family involved in the biosynthesis of VLCFA (very long chain fatty acids).	KCS16
SHI_00026148-RA	4.66717	0.777962	3.04e-05	Up	AT5G58782	Undecaprenyl pyrophosphate synthetase family protein	CPT6
SHI_00007514-RA	-3.88047	2.37393	3.18e-05	Down	AT4G10465	Heavy metal transport/detoxification superfamily protein	HIPP44
SHI_00030886-RA	-2.23513	3.84139	3.18e-05	Down	AT2G26330	Homologous to receptor protein kinases. Involved in specification of organs originating from the shoot apical meristem. Contains a cytoplasmic protein kinase catalytic domain, a transmembrane region, and an extracellular leucine-rich repeat. ER has been identified as a quantitative trait locus for transpiration efficiency by influencing epidermal and mesophyll development, stomatal density and po…	ER
SHI_00003069-RA	3.90272	1.37315	3.18e-05	Up	AT3G20015	Eukaryotic aspartyl protease family protein	AT3G20015
SHI_00016718-RA	3.27457	4.81273	3.19e-05	Up	AT4G14960	Encodes an alpha-tubulin isoform required for right handed helical growth.	TUA6
SHI_00020956-RA	-3.49977	4.75875	3.33e-05	Down	AT1G29195	phosphatidylinositol 4-phosphate 5-kinase MSS4-like protein	AT1G29195
SHI_00014201-RA	-2.19532	4.73635	3.36e-05	Down	AT4G17245	RING/U-box superfamily protein	ATL18
SHI_00014401-RA	-4.97388	3.71314	3.37e-05	Down	AT3G62960	Encodes a member of the CC-type glutaredoxin (ROXY) family that has been shown to interact with the transcription factor TGA2.	ROXY8
SHI_00028949-RA	3.93348	2.51412	3.39e-05	Up	AT2G28790	Pathogenesis-related thaumatin superfamily protein	AT2G28790
SHI_00017376-RA	4.14903	0.428565	3.49e-05	Up	AT4G04890	Encodes a homeodomain protein that is expressed in the LI layer of the vegetative, floral and inflorescence meristems. Binds to the L1 box promoter element which is required in some proteins for L1 specific expression.	PDF2
SHI_00025995-RA	-2.14751	4.29492	3.53e-05	Down	AT4G02670	indeterminate(ID)-domain 12	ID
SHI_00020974-RA	-2.46722	4.45343	3.53e-05	Down	AT4G18570	Microtubule associated protein involved in cortical microtubule organization.	IPGA1
SHI_00030492-RA	2.35313	1.08529	3.63e-05	Up	AT4G04740	member of Calcium Dependent Protein Kinase	CPK23
SHI_00017252-RA	3.41509	8.73283	3.63e-05	Up	AT4G22690	member of CYP706A The mRNA is cell-to-cell mobile.	CYP706A1
SHI_00002072-RA	3.26447	2.78562	3.66e-05	Up	AT1G15010	mediator of RNA polymerase II transcription subunit	AT1G15010
SHI_00016218-RA	2.98047	0.860808	3.74e-05	Up	AT3G28360	P-glycoprotein 16	ABCB16
SHI_00006563-RA	2.94089	1.25864	3.75e-05	Up	AT5G19520	mechanosensitive channel of small conductance-like 9	MSL9
SHI_00002321-RA	-2.0129	4.20644	3.78e-05	Down	AT3G02250	O-fucosyltransferase family protein	RRT2
SHI_00029894-RA	3.86381	1.76218	3.81e-05	Up	AT3G14360	alpha/beta-Hydrolases superfamily protein	ATOBL1
SHI_00002719-RA	3.86396	4.36494	3.94e-05	Up	AT1G67850	lysine ketoglutarate reductase trans-splicing protein (DUF707)	AT1G67850
SHI_00003444-RA	3.60328	1.24257	3.95e-05	Up	AT2G36200	P-loop containing nucleoside triphosphate hydrolases superfamily protein	AT2G36200
SHI_00018089-RA	3.58994	0.648106	3.96e-05	Up	AT1G31740	Encodes a putative &beta	BGAL15
SHI_00010841-RA	-3.24091	5.28909	4.12e-05	Down	AT2G36050	ovate family protein 15	OFP15
SHI_00018774-RA	2.37174	4.81405	4.14e-05	Up	AT5G56010	A member of heat shock protein 90 (HSP90) gene family. Expressed in all tissues and abundant in root apical meristem, pollen and tapetum. Expression is NOT heat-induced but induced by IAA and NaCl. Overexpression reduced tolerance to heat and conferred higher tolerance to calcium. The mRNA is cell-to-cell mobile.	HSP81-3
SHI_00017356-RA	4.98797	1.20795	4.21e-05	Up	AT1G73140	Encodes a member of the TBL (TRICHOME BIREFRINGENCE-LIKE) gene family containing a plant-specific DUF231 (domain of unknown function) domain. TBL gene family has 46 members, two of which (TBR/AT5G06700 and TBL3/AT5G01360) have been shown to be involved in the synthesis and deposition of secondary wall cellulose, presumably by influencing the esterification state of pectic polymers. A nomenclature…	TBL31
SHI_00014601-RA	4.69518	1.49682	4.22e-05	Up	AT3G12830	SAUR-like auxin-responsive protein family	SAUR72
SHI_00019088-RA	2.06779	5.52315	4.23e-05	Up	AT5G45820	Encodes a CBL-interacting serine/threonine protein kinase comprised of an N-terminal kinase catalytic domain similar to SNF1/AMPK and a unique C-terminal regulatory domain.	CIPK20
SHI_00028958-RA	3.53176	3.09176	4.25e-05	Up	AT4G16820	Encodes a lipase that hydrolyzes phosphatidylcholine, glycolipids as well as triacylglycerols.	PLA-I{BETA]2
SHI_00009412-RA	3.82342	7.41553	4.26e-05	Up	AT5G23360	GRAM domain-containing protein / ABA-responsive protein-like protein	AT5G23360
SHI_00014268-RA	3.86895	1.69277	4.29e-05	Up	AT4G13610	DNA (cytosine-5-)-methyltransferase family protein	MEE57
SHI_00014179-RA	7.00334	5.40723	4.37e-05	Up	AT2G36780	UDP-Glycosyltransferase superfamily protein	AT2G36780
SHI_00024807-RA	-2.60947	3.01026	4.41e-05	Down	AT5G50915	basic helix-loop-helix (bHLH) DNA-binding superfamily protein	AT5G50915
SHI_00023995-RA	4.81423	1.67082	4.42e-05	Up	AT4G27450	aluminum induced protein with YGL and LRDR motifs	AT4G27450
SHI_00022812-RA	-3.55416	5.04681	4.44e-05	Down	AT3G23800	selenium-binding protein 3	SBP3
SHI_00012741-RA	-3.28225	5.499	4.53e-05	Down	AT1G04920	Encodes a protein with putative sucrose-phosphate synthase activity.	SPS3F
SHI_00030093-RA	2.06459	4.30373	4.59e-05	Up	AT3G10960	Encodes a homolog of the adenine-guanine-hypoxanthine transporter AzgA of Aspergillus nidulans. Function as a plant adenine-guanine transporter. Two closely related genes exist in Arabidopsis: AT3G10960 (Azg1) and AT5G50300 (Azg2).	AZG1
SHI_00003603-RA	2.35775	3.22315	4.61e-05	Up	AT1G74360	NILR1 encodes a serine/threonine kinase involved in defense response to nematodes.	NILR1
SHI_00008094-RA	-2.06836	3.99443	4.62e-05	Down	AT3G45900	Ribonuclease P protein subunit P38-like protein	AT3G45900
SHI_00001941-RA	-2.27474	4.35594	4.66e-05	Down	AT5G04660	encodes a protein with cytochrome P450 domain	CYP77A4
SHI_00002733-RA	3.23065	1.15294	4.76e-05	Up	AT1G24510	TCP-1/cpn60 chaperonin family protein	AT1G24510
SHI_00023160-RA	2.03443	1.83828	4.82e-05	Up	AT5G37150	P-loop containing nucleoside triphosphate hydrolases superfamily protein	AT5G37150
SHI_00002032-RA	2.80425	2.26798	4.84e-05	Up	AT1G14890	Plant invertase/pectin methylesterase inhibitor superfamily protein	AT1G14890
SHI_00021656-RA	3.81352	4.81086	4.84e-05	Up	AT5G46040	Major facilitator superfamily protein	AT5G46040
SHI_00010818-RA	3.12665	1.60237	4.93e-05	Up	AT2G36210	SAUR-like auxin-responsive protein family	SAUR45
SHI_00000924-RA	6.53475	6.0007	4.95e-05	Up	AT2G31953	Encodes a member of a family of small,secreted, cysteine rich protein with sequence similarity to the PCP (pollen coat protein) gene family.	LCR76
SHI_00012923-RA	-2.23849	6.3085	4.98e-05	Down	AT1G72140	Tonoplast localized pH dependent, low affinity nitrogen transporter.In shoots, expressed in leaf veins and mesophyll. In roots, GUS activity was detected in root vascular stele. More highly expressed in roots.	NPF5.12
SHI_00011617-RA	2.36188	4.34615	4.99e-05	Up	AT3G28500	60S acidic ribosomal protein family	AT3G28500
SHI_00002414-RA	3.01237	1.28858	5.18e-05	Up	AT1G03670	Ankyrin repeat containing protein	AT1G03670
SHI_00012934-RA	-2.01133	5.51234	5.21e-05	Down	AT1G72160	Sec14p-like phosphatidylinositol transfer family protein	PATL3
SHI_00028243-RA	-2.95485	2.723	5.27e-05	Down	AT3G59420	Encodes a membrane localized protein with similarity to receptor kinases which is involved in epidermal cell differentiation. Flowers of mutants have disorganized ovule integument growth and abnormal sepal margins. In the roots, mutants initiate more lateral roots but fewer laterals actually emerge due to defects in lateral root formation. Mutants also display disorganized columella. The root phe…	CR4
SHI_00016645-RA	-3.10738	4.64674	5.29e-05	Down	AT3G02110	serine carboxypeptidase-like 25	SCPL25
SHI_00005927-RA	-2.12371	5.04003	5.31e-05	Down	AT3G49200	O-acyltransferase (WSD1-like) family protein	AT3G49200
SHI_00006259-RA	2.57883	1.14812	5.38e-05	Up	AT3G52310	ABC transporter G family member 27	ABCG27
SHI_00018873-RA	2.10808	7.08637	5.43e-05	Up	AT5G42230	serine carboxypeptidase-like 41	SCPL41
SHI_00004830-RA	-2.74033	2.9115	5.48e-05	Down	AT4G39900	adenine deaminase	AT4G39900
SHI_00028753-RA	-2.47879	9.4235	5.53e-05	Down	AT2G40880	Encodes a protein with cysteine proteinase inhibitor activity. Overexpression increases tolerance to abiotic stressors (i.e.salt,osmotic, cold stress). The mRNA is cell-to-cell mobile.	CYSA
SHI_00021570-RA	-2.50421	7.94089	5.56e-05	Down	AT3G54550	DNA-directed RNA polymerase subunit beta-beta protein, putative (DUF506)	AT3G54550
SHI_00025979-RA	2.88649	3.46386	5.56e-05	Up	AT2G38820	DNA-directed RNA polymerase subunit beta-beta protein, putative (DUF506)	AT2G38820
SHI_00030456-RA	3.70048	1.33698	5.64e-05	Up	AT1G62420	DUF506 family protein (DUF506)	AT1G62420
SHI_00010688-RA	3.52236	7.37434	5.71e-05	Up	AT3G10340	Encodes PAL4, a putative a phenylalanine ammonia-lyase. Arabidopsis has four PALs: AT2G37040 (PAL1), AT3G53260 (PAL2), AT5G04230 (PAL3) and AT3G10340 (PAL4).	PAL4
SHI_00006922-RA	-2.28114	3.30997	5.75e-05	Down	AT1G47620	member of CYP96A	CYP96A8
SHI_00017055-RA	3.61808	3.45327	5.79e-05	Up	AT3G16500	phytochrome-associated protein 1 (PAP1)	PAP1
SHI_00013800-RA	3.89298	0.720737	5.89e-05	Up	AT5G03250	Phototropic-responsive NPH3 family protein	AT5G03250
SHI_00020404-RA	-2.20501	4.89631	5.98e-05	Down	AT5G56850	hypothetical protein	AT5G56850
SHI_00005741-RA	-2.64374	8.83134	6e-05	Down	AT5G14360	Ubiquitin-like superfamily protein	AT5G14360
SHI_00025057-RA	2.24264	2.51662	6.04e-05	Up	AT5G62940	HCA2 induces the formation of interfascicular cambium and regulates vascular tissue development in the aerial parts of the plant. Evidence from both gain of function and dominant negative alleles. PEAR protein involved in the formation of a short-range concentration gradient that peaks at protophloem sieve elements, and activates gene expression that promotes radial growth. Locally promotes trans…	HCA2
SHI_00000420-RA	3.9246	9.68379	6.11e-05	Up	AT5G40010	Encodes a mitochondrial ATPase involved in seed and silique development.	AATP1
SHI_00004754-RA	-3.46003	3.58313	6.16e-05	Down	AT5G35715	encodes a protein with cytochrome P450 domain	CYP71B8
SHI_00003801-RA	3.08988	2.67868	6.18e-05	Up	AT1G18390	Serine/Threonine kinase family catalytic domain protein	LRK10L1.2
SHI_00005783-RA	2.50289	2.24479	6.27e-05	Up	AT5G14180	Myzus persicae-induced lipase 1	MPL1
SHI_00023086-RA	-2.01176	5.1806	6.55e-05	Down	AT5G07190	Gene is expressed preferentially in the embryo and encodes a unique protein of unknown function.	ATS3
SHI_00027691-RA	-2.2821	7.80605	6.66e-05	Down	AT5G45810	Encodes a member of the SNF1-related kinase (SnRK) gene family (SnRK3.5), which has also been reported as a member of the CBL-interacting protein kinases (CIPK19).	CIPK19
SHI_00030116-RA	-3.112	2.018	6.69e-05	Down	AT1G52750	alpha/beta-Hydrolases superfamily protein	AT1G52750
SHI_00002184-RA	-2.72713	1.54498	6.81e-05	Down	AT1G68585	hypothetical protein	AT1G68585
SHI_00021872-RA	4.68899	1.51435	6.83e-05	Up	AT4G19030	an aquaporin whose expression level is reduced by ABA, NaCl, dark, and desiccation. is expressed at relatively low levels under normal conditions. Also functions in arsenite transport and tolerance.	NLM1
SHI_00023659-RA	3.09015	1.95952	6.91e-05	Up	AT1G61610	S-locus lectin protein kinase family protein	AT1G61610
SHI_00025607-RA	3.79642	0.4759	6.92e-05	Up	AT3G48490	hypothetical protein	AT3G48490
SHI_00010315-RA	4.12535	0.5782	6.92e-05	Up	AT5G02390	Target promoter of the male germline-specific transcription factor DUO1.	DAU1
SHI_00009616-RA	2.50972	2.35553	6.95e-05	Up	AT3G54560	Encodes HTA11, a histone H2A protein. Loss of all H2A.Z (triple mutant with HTA8 and HTA9) results in a reduction in DNA methylation of transposons but not that of genes. Loss of H2A.Z causes misregulation of many genes involved in the response to developmental and environmental cues, and that these genes tend to have high levels of gene-body H2A.Z.	HTA11
SHI_00000485-RA	3.0682	8.20122	7.02e-05	Up	AT2G41380	S-adenosyl-L-methionine-dependent methyltransferases superfamily protein	AT2G41380
SHI_00014863-RA	3.22888	1.68025	7.1e-05	Up	AT1G23530	transmembrane protein	AT1G23530
SHI_00020225-RA	-2.67631	6.03417	7.24e-05	Down	AT5G57670	Protein kinase superfamily protein	AT5G57670
SHI_00020862-RA	2.7346	1.8412	7.31e-05	Up	AT2G42360	RING/U-box superfamily protein	ATL41
SHI_00020335-RA	-2.16664	7.16613	7.45e-05	Down	AT3G24430	Encodes chloroplast protein HCF101 (high chlorophyll fluorescence 101). Serves as a chloroplast scaffold protein that specifically assembles [4Fe-4S] clusters and transfers them to the chloroplast membrane and soluble target proteins.	HCF101
SHI_00003183-RA	2.64169	2.30175	7.49e-05	Up	AT2G16440	Regulates DNA replication via interaction with BICE1 and MCM7.	MCM4
SHI_00015122-RA	2.09377	3.82072	7.62e-05	Up	AT2G19920	RNA-dependent RNA polymerase family protein	AT2G19920
SHI_00013410-RA	-3.38919	1.67636	7.82e-05	Down	AT5G46760	MYC3 is a JAZ-interacting transcription factor that act together with MYC2 and MYC4 to activate JA-responses. The mRNA is cell-to-cell mobile.	MYC3
SHI_00010934-RA	3.15147	0.707246	7.83e-05	Up	AT3G54120	Reticulon family protein	AT3G54120
SHI_00000372-RA	-2.03751	2.55887	7.85e-05	Down	AT3G51060	A member of SHI gene family. Arabidopsis thaliana has ten members that encode proteins with a RING finger-like zinc finger motif. Despite being highly divergent in sequence, many of the SHI-related genes are partially redundant in function and synergistically promote gynoecium, stamen and leaf development in Arabidopsis. STY1/STY2 double mutants showed defective style, stigma as well as serrated …	STY1
SHI_00025755-RA	2.23948	1.97257	8.04e-05	Up	AT5G37500	Encodes a guard cell outward potassium channel. Belongs to the Shaker family K+ channel. This family includes five groups based on phylogenetic analysis (FEBS Letters (2007) 581: 2357): I (inward rectifying channel): AKT1 (AT2G26650), AKT5 (AT4G32500) and SPIK (also known as AKT6, AT2G25600)	GORK
SHI_00027414-RA	-2.90199	4.07519	8.05e-05	Down	AT1G74110	member of CYP78A	CYP78A10
SHI_00026780-RA	-2.78935	3.15534	8.32e-05	Down	AT1G34210	Plasma membrane LRR receptor-like serine threonine kinase expressed during embryogenesis in locules until stage 6 anthers, with higher expression in the tapetal cell layer. SERK1 and SERK2 receptor kinases function redundantly as an important control point for sporophytic development controlling male gametophyte production. The mRNA is cell-to-cell mobile.	SERK2
SHI_00001727-RA	2.00776	6.16365	8.35e-05	Up	AT2G24570	member of WRKY Transcription Factor	WRKY17
SHI_00016695-RA	3.09255	1.71015	8.46e-05	Up	AT5G61430	NAC domain containing protein 100	NAC100
SHI_00004675-RA	2.2689	2.7594	8.47e-05	Up	AT2G22880	VQ motif-containing protein	VQ12
SHI_00027438-RA	4.26759	0.856424	8.63e-05	Up	AT5G61340	transmembrane protein	AT5G61340
SHI_00005120-RA	2.95176	4.87874	8.68e-05	Up	AT5G22930	enabled-like protein (DUF1635)	AT5G22930
SHI_00018277-RA	-2.14965	5.15043	8.75e-05	Down	AT4G12440	adenine phosphoribosyl transferase 4	APT4
SHI_00004831-RA	-2.83659	4.31217	8.85e-05	Down	AT5G64970	Mitochondrial substrate carrier family protein	AT5G64970
SHI_00025088-RA	-2.90493	5.72979	8.88e-05	Down	AT5G06380	hypothetical protein	AT5G06380
SHI_00029947-RA	2.93252	0.594409	8.91e-05	Up	AT3G55950	CRINKLY4 related 3	CCR3
SHI_00025301-RA	-3.66705	3.74532	8.94e-05	Down	AT1G01190	cytochrome P450, family 78, subfamily A, polypeptide 8	CYP78A8
SHI_00000595-RA	2.03603	6.83148	9.08e-05	Up	AT3G19760	Encodes an RNA helicase that may be a component of the Exon Junction Complex. Subcellular localization is modulated by stress. Under normal conditions it is localized to the nuceloplasm but under hyopoxic conditions it localizes to the nucleolus and splicing speckles.	EIF4A-III
SHI_00010306-RA	-4.27336	2.06935	9.61e-05	Down	AT3G61680	PLIP1 encodes a plastid localized phospholipase A1 involved in seed oil biosynthesis.	PLIP1
SHI_00018335-RA	-2.96886	2.17578	9.73e-05	Down	AT3G16800	EGR3 functions as a negative regulator of plant growth with prominent effect on plant growth during drought stress, EGR3 regulates microtubule organization and likely affects additional cytoskeleton and trafficking processes along the plasma membrane.	EGR3
SHI_00010457-RA	2.9982	3.26394	9.75e-05	Up	AT2G46630	serine/arginine repetitive matrix protein	AT2G46630
SHI_00005172-RA	2.90606	3.32257	9.77e-05	Up	AT3G45690	Encodes a member of the NAXT NPF subfamily.	AT3G45690
SHI_00001572-RA	-2.4813	4.66711	0.000100237	Down	AT5G11790	Plays a role in dehydration stress response.	NDL2
SHI_00018734-RA	-3.33843	1.88848	0.000102219	Down	AT3G19940	Encodes a hexose-H(+) symporter that catalyzes the high-affinity uptake of glucose, galactose and mannose that is induced under low-glucose conditions in pollen tubes.	STP10
SHI_00030581-RA	-2.10116	3.24525	0.000102376	Down	AT5G22390	FANTASTIC four-like protein (DUF3049)	AT5G22390
SHI_00015265-RA	2.23479	4.73083	0.000103939	Up	AT1G15500	TLC ATP/ADP transporter	ATNTT2
SHI_00011462-RA	3.4319	1.53525	0.000107299	Up	AT5G59190	subtilase family protein	AT5G59190
SHI_00025766-RA	3.36756	1.27402	0.000109296	Up	AT5G24540	beta glucosidase 31	BGLU31
SHI_00010129-RA	4.44825	3.17536	0.000110688	Up	AT2G30830	encodes a protein whose sequence is similar to 2-oxoglutarate-dependent dioxygenase	AT2G30830
SHI_00005067-RA	2.90843	3.17518	0.000112769	Up	AT3G44380	Late embryogenesis abundant (LEA) hydroxyproline-rich glycoprotein family	AT3G44380
SHI_00004459-RA	3.03862	1.03904	0.000113413	Up	AT2G28670	Encodes a protein of unknown function that is involved in formation of the casparian strip. ESB1 is localized to the casparian strip and this localization is depended on CASP1 and 2. esb1 mutants have increased levels of suberin, disordered casparian strip and altered levels of several ions in their leaves.	ESB1
SHI_00022688-RA	3.73634	2.40659	0.000114	Up	AT3G54320	WRINKLED1 encodes transcription factor of the AP2/ERWEBP class. Protein has two plant-specific (AP2/EREB) DNA-binding domains and is involved in the control of storage compound biosynthesis in Arabidopsis. Mutants have wrinkled seed phenotype, due to a defect in the incorporation of sucrose and glucose into triacylglycerols. Transgenic sGsL plants (21-day-old) grown on 6% sucrose for 24 hours had…	WRI1
SHI_00025990-RA	3.038	2.56838	0.000114417	Up	AT3G63370	Encodes a chloroplast RNA editing factor.	OTP86
SHI_00008332-RA	3.00267	0.770362	0.000114555	Up	AT5G20420	Involved in gene silencing. Locus-specific regulator of 24nt-siRNA expression, works together with CLSY1-4 as the master regulators of essentially all Pol-IV-dependent 24nt-siRNAs.	CHR42
SHI_00014759-RA	3.90029	1.42283	0.000116983	Up	AT5G38240	Protein kinase family protein	AT5G38240
SHI_00013018-RA	2.01537	4.98736	0.000121939	Up	AT2G28070	ABC-2 type transporter family protein	ABCG3
SHI_00005729-RA	2.6292	1.07683	0.000122431	Up	AT5G14490	NAC domain containing protein 85	NAC085
SHI_00021946-RA	-3.86041	2.26558	0.000124466	Down	AT1G30020	hypothetical protein (Protein of unknown function, DUF538)	AT1G30020
SHI_00030924-RA	9.43173	1.54517	0.000125097	Up	AT1G76520	Auxin efflux carrier family protein	PILS3
SHI_00029735-RA	2.13992	1.90374	0.000125979	Up	AT2G24530	transcriptional regulator of RNA polII, SAGA, subunit	AT2G24530
SHI_00014772-RA	5.46606	4.18979	0.000126349	Up	AT4G27970	Encodes a protein with ten predicted transmembrane helices. The SLAH2 protein has similarity to the SLAC1 protein involved in ion homeostasis in guard cells. But, it is not expressed in guard cells and cannot complement a slac1-2 mutant suggesting that it performs a different function. SLAH2:GFP localizes to the plasma membrane.	SLAH2
SHI_00020402-RA	-2.48321	5.968	0.000126466	Down	AT4G26150	Encodes a member of the GATA factor family of zinc finger transcription factors. Modulate chlorophyll biosynthesis and glutamate synthase (GLU1/Fd-GOGAT) expression.	CGA1
SHI_00008528-RA	2.30841	6.03265	0.000128579	Up	AT1G76690	Encodes one of the closely related 12-oxophytodienoic acid reductases. This enzyme is not expected to participate in jasmonic acid biosynthesis because during in vitro assays, it shows very little activity with the naturally occurring OPDA isomer. Shows activity towards 2,4,6-trinitrotoluene. Expressed predominately in root. Predicted to be a cytosolic protein.	OPR2
SHI_00001134-RA	-2.93328	4.08433	0.000129034	Down	AT1G14920	Similar to a putative transcription factor and transcriptional coactivators. Repressor of GA responses and involved in gibberellic acid mediated signaling. Member of the DELLA proteins that restrain the cell proliferation and expansion that drives plant growth. The protein undergoes degradation in response to GA via the 26S proteasome. GAI may be involved in reducing ROS accumulation in response …	GAI
SHI_00000018-RA	2.32855	5.10036	0.000129564	Up	AT1G26560	beta glucosidase 40	BGLU40
SHI_00007126-RA	3.04116	8.41186	0.000129886	Up	AT5G43170	Encodes zinc finger protein. mRNA levels are elevated in response to high salinity and low temperature. The protein is localized to the nucleus and acts as a transcriptional repressor.	ZF3
SHI_00013708-RA	-3.79922	0.876157	0.000132623	Down	AT3G52780	Purple acid phosphatases superfamily protein	PAP20
SHI_00018540-RA	3.99835	1.80597	0.000134495	Up	AT5G24560	phloem protein 2-B12	PP2-B12
SHI_00004306-RA	2.28945	3.61943	0.000136726	Up	AT1G29280	member of WRKY Transcription Factor	WRKY65
SHI_00018753-RA	3.01937	0.760641	0.000137839	Up	AT2G32020	Acyl-CoA N-acyltransferases (NAT) superfamily protein	AT2G32020
SHI_00018374-RA	-2.27721	2.72879	0.000140448	Down	AT2G01570	Member of the VHIID/DELLA regulatory family. Contains homopolymeric serine and threonine residues, a putative nuclear localization signal, leucine heptad repeats, and an LXXLL motif. Putative transcriptional regulator repressing the gibberellin response and integration of phytohormone signalling. DELLAs repress cell proliferation and expansion that drives plant growth. The protein undergoes degra…	RGA1
SHI_00005834-RA	-2.07701	3.06219	0.000140661	Down	AT4G24250	A member of a large family of seven-transmembrane domain proteins specific to plants, homologs of the barley mildew resistance locus o (MLO) protein. The Arabidopsis genome contains 15 genes encoding MLO proteins, with localization in plasma membrane. Phylogenetic analysis revealed four clades of closely-related AtMLO genes. ATMLO13 belongs to the clade II, with ATMLO1 and ATMLO15. The gene is ex…	MLO13
SHI_00022724-RA	2.25626	3.34721	0.000141265	Up	AT5G43560	Encodes MUSE14, a TRAF domain protein. Regulates the turnover of nucleotide-binding domain and leucine-rich repeat-containing (NLR) immune receptors SNC1 and RPS2. Loss of both MUSE13 and MUSE14 leads to enhanced pathogen resistance, NLR accumulation, and autoimmunity. In addition, MUSE13/14 physically interact with ATG6 and appear to regulate ATG6 ubiquitination and thus formation of autophagoso…	MUSE14
SHI_00010305-RA	-2.27969	7.65503	0.00014224	Down	AT4G01050	hydroxyproline-rich glycoprotein family protein, contains a rhodanese homology domain. Required for anchoring the FNR flavoenzyme to the thylakoid membranes and sustaining high efficiency photosynthetic linear electron flow. The mRNA is cell-to-cell mobile.	TROL
SHI_00017059-RA	-2.79752	0.45505	0.000144082	Down	AT1G51960	Member of IQ67 (CaM binding) domain containing family.	IQD27
SHI_00028548-RA	-2.03264	6.15153	0.000145808	Down	AT3G59440	Encodes an endomembrane localized member of the CML subfamily VII. Contains a canonical CaM domain and unique N-terminal extension that distinguishes it from other members of the subfamily.	ATCML4
SHI_00008674-RA	2.04672	6.60199	0.000146094	Up	AT2G31880	Encodes a putative leucine rich repeat transmembrane protein that is expressed in response to Pseudomonas syringae. Expression of SRRLK may be required for silencing via lsiRNAs. Regulates cell death and innate immunity.	SOBIR1
SHI_00002826-RA	-2.26394	3.70139	0.000146528	Down	AT2G33510	CFL1 is a negative regulator of cuticle development. Overexpression of CFL1 causes defects in cuticle formation. Interacts with FBH1, FBH3 and HDG1 to regulate cuticle formation. The physical interaction requires the C terminal 50 amino acids.	CFL1
SHI_00000412-RA	4.34105	2.2913	0.000147193	Up	AT2G18210	hypothetical protein	AT2G18210
SHI_00015510-RA	-2.38689	5.96066	0.000149084	Down	AT3G16370	GDSL-motif esterase/acyltransferase/lipase. Enzyme group with broad substrate specificity that may catalyze acyltransfer or hydrolase reactions with lipid and non-lipid substrates. The mRNA is cell-to-cell mobile.	AT3G16370
SHI_00008482-RA	4.16763	1.26399	0.000149538	Up	AT5G24710	WD40/YVTN repeat protein.	TWD40-2
SHI_00001925-RA	-2.55249	2.0377	0.000150472	Down	AT5G04460	RING/U-box superfamily protein	AT5G04460
SHI_00024069-RA	2.24627	2.52957	0.000153907	Up	AT4G04960	Concanavalin A-like lectin protein kinase family protein	LECRK-VII.1
SHI_00007497-RA	3.43741	1.656	0.000159419	Up	AT1G01110	Member of IQ67 (CaM binding) domain containing family.	IQD18
SHI_00025168-RA	2.24474	5.21519	0.00016107	Up	AT2G36540	Haloacid dehalogenase-like hydrolase (HAD) superfamily protein	AT2G36540
SHI_00028444-RA	-2.66613	5.1846	0.000161852	Down	AT5G06950	Transcription factor of the B-ZIP family that has high affinity for C-box motifs. Interacts with NPR1 and may regulate PR gene expression. Phosphorylated by a CK2-like protein in vitro. Phosphorylation is enhanced by salicylic acid treatment.	AHBP-1B
SHI_00014474-RA	-2.31795	2.84671	0.000162107	Down	AT4G24830	arginosuccinate synthase family	AT4G24830
SHI_00007746-RA	-2.82787	2.47685	0.000162515	Down	AT5G28730	nuclease	AT5G28730
SHI_00005930-RA	-2.60574	0.703583	0.000162648	Down	AT1G77240	AMP-dependent synthetase and ligase family protein	AAE2
SHI_00028933-RA	-2.17124	6.16584	0.000163932	Down	AT5G35100	Cyclophilin-like peptidyl-prolyl cis-trans isomerase family protein	AT5G35100
SHI_00009594-RA	-2.89263	1.33369	0.000166835	Down	AT3G51910	member of Heat Stress Transcription Factor (Hsf) family The mRNA is cell-to-cell mobile.	HSFA7A
SHI_00029899-RA	-2.50826	2.20357	0.000166835	Down	AT1G14190	Glucose-methanol-choline (GMC) oxidoreductase family protein	AT1G14190
SHI_00011221-RA	5.04604	3.80793	0.000169188	Up	AT5G58390	Peroxidase superfamily protein	AT5G58390
SHI_00010719-RA	2.35503	3.34005	0.000169518	Up	AT5G03380	Heavy metal transport/detoxification superfamily protein	AT5G03380
SHI_00004534-RA	-2.03936	5.43921	0.000171556	Down	AT4G03510	RMA1 encodes a novel 28 kDa protein with a RING finger motif and a C-terminal membrane-anchoring domain that is involved in the secretory pathway. Has E3 ubiquitin ligase activity.	RMA1
SHI_00024435-RA	4.18069	3.15638	0.000175277	Up	AT2G37430	Encodes a member of the zinc finger family of transcriptional regulators. It is expressed in many root tips, primary roots, cotyledons and hypocotyl. The protein is localized to the nucleus. Overexpression of ZAT11 causes increased root growth and increased sensitivity to nickel ions. The mRNA is cell-to-cell mobile.	ZAT11
SHI_00022893-RA	2.55778	1.15738	0.000175386	Up	AT5G60930	P-loop containing nucleoside triphosphate hydrolases superfamily protein	AT5G60930
SHI_00008565-RA	2.27356	7.18414	0.000177012	Up	AT2G23800	encodes an endoplasmic reticulum-targeted geranylgeranyl pyrophosphate synthase	GGPS2
SHI_00002445-RA	-2.12202	1.2893	0.00017768	Down	AT5G51560	Leucine-rich repeat protein kinase family protein	AT5G51560
SHI_00011833-RA	3.12122	2.99742	0.000183841	Up	AT2G28630	Encodes KCS12, a member of the 3-ketoacyl-CoA synthase family involved in the biosynthesis of VLCFA (very long chain fatty acids).	KCS12
SHI_00004433-RA	2.64524	0.991199	0.000184166	Up	AT4G15120	VQ motif-containing protein	AT4G15120
SHI_00012673-RA	3.83778	0.926714	0.000185233	Up	AT3G06840	hypothetical protein	AT3G06840
SHI_00007051-RA	-2.91983	3.01213	0.000185958	Down	AT4G02650	Phosphatidylinositol binding clathrin assembly protein 5A/B are recent paralogs with overlapping functions in recycling ANXUR proteins to the pollen tube membrane.	PICALM5B
SHI_00013432-RA	-2.09863	5.22944	0.000188336	Down	AT1G31050	basic helix-loop-helix (bHLH) DNA-binding superfamily protein	AT1G31050
SHI_00016541-RA	-3.28017	2.34883	0.000191453	Down	AT5G66590	CAP (Cysteine-rich secretory proteins, Antigen 5, and Pathogenesis-related 1 protein) superfamily protein	AT5G66590
SHI_00000686-RA	3.68228	0.683206	0.000192132	Up	AT4G11050	glycosyl hydrolase 9C3	GH9C3
SHI_00010545-RA	2.42847	3.11811	0.000194826	Up	AT5G08490	Tetratricopeptide repeat (TPR)-like superfamily protein	SLG1
SHI_00001818-RA	6.26826	7.7792	0.000194906	Up	AT2G38870	Predicted to encode a PR (pathogenesis-related) peptide that belongs to the PR-6 proteinase inhibitor family. Six putative PR-6-type protein encoding genes are found in Arabidopsis: At2g38900, At2g38870, At5g43570, At5g43580, At3g50020 and At3g46860.	AT2G38870
SHI_00004001-RA	-2.02916	5.81492	0.000195816	Down	AT4G16380	Heavy metal transport/detoxification superfamily protein	AT4G16380
SHI_00025278-RA	4.15302	4.83844	0.000198494	Up	AT3G53720	member of Putative Na+/H+ antiporter family. Involved in the osmoregulation through K(+) fluxes and possibly pH modulation of an active endomembrane system in guard cells.	CHX20
SHI_00001718-RA	2.52946	3.10394	0.000198569	Up	AT4G25760	Encodes a member of the GDU (glutamine dumper) family proteins involved in amino acid export: At4g31730 (GDU1), At4g25760 (GDU2), At5g57685 (GDU3), At2g24762 (GDU4), At5g24920 (GDU5), At3g30725 (GDU6) and At5g38770 (GDU7).	GDU2
SHI_00017943-RA	2.02507	2.94207	0.000200675	Up	AT4G14700	Encodes origin of replication complex 1a subunit.The protein contains a PHD domain,binds methylated DNA and appears to function as a transcriptional activator.	ORC1A
SHI_00013294-RA	2.84993	3.32754	0.000200675	Up	AT1G20310	syringolide-induced protein	AT1G20310
SHI_00022443-RA	2.89123	0.698893	0.000201011	Up	AT3G24340	Involved in gene silencing. Locus-specific regulator of 24nt-siRNA expression, works together with CLSY1-3 as the master regulators of essentially all Pol-IV-dependent 24nt-siRNAs.	CHR40
SHI_00014082-RA	3.27703	0.462468	0.000201011	Up	AT4G01270	RING/U-box superfamily protein	AT4G01270
SHI_00010673-RA	5.45772	0.80225	0.000202899	Up	AT5G01040	putative laccase, knockout mutant showed early flowering	LAC8
SHI_00011825-RA	-2.13068	2.7468	0.000203998	Down	AT3G46130	Encodes a putative transcription factor (MYB48) that functions to regulate flavonol biosynthesis primarily in cotyledons.	MYB48
SHI_00011980-RA	2.73023	1.02858	0.00020693	Up	AT4G02110	transcription coactivator	AT4G02110
SHI_00000370-RA	2.70348	5.0551	0.000207895	Up	AT5G03970	F-box associated ubiquitination effector family protein	AT5G03970
SHI_00017640-RA	4.15293	7.28467	0.000210215	Up	AT2G40200	basic helix-loop-helix (bHLH) DNA-binding superfamily protein	AT2G40200
SHI_00006731-RA	-2.19505	6.81017	0.000211613	Down	AT5G37360	LOW protein: ammonium transporter 1-like protein	AT5G37360
SHI_00001845-RA	3.0725	3.52549	0.000213614	Up	AT4G23880	hypothetical protein	AT4G23880
SHI_00015690-RA	3.22607	1.22002	0.000216456	Up	AT2G42270	Similar to yeast Brr2p DEAD/DExH box ATP-dependent RNA helicase.	BRR2B
SHI_00016929-RA	2.40492	4.77964	0.000217576	Up	AT1G31200	phloem protein 2-A9	PP2-A9
SHI_00014199-RA	-2.22557	10.4946	0.000220864	Down	AT5G13630	Encodes magnesium chelatase involved in plastid-to-nucleus signal transduction.	GUN5
SHI_00014939-RA	3.68058	4.93795	0.000222301	Up	AT1G19020	CDP-diacylglycerol-glycerol-3-phosphate 3-phosphatidyltransferase	AT1G19020
SHI_00007002-RA	3.15831	1.30601	0.000222349	Up	AT2G14050	minichromosome maintenance 9	MCM9
SHI_00017027-RA	-2.58243	3.33039	0.000224128	Down	AT2G45050	Encodes a member of the GATA factor family of zinc finger transcription factors. A positive regulator of photomorphogenesis.	GATA2
SHI_00013841-RA	-2.27187	7.32323	0.000225385	Down	AT3G53530	Chloroplast-targeted copper chaperone protein	NAKR3
SHI_00013942-RA	3.82015	0.78582	0.00022984	Up	AT1G68620	alpha/beta-Hydrolases superfamily protein	AT1G68620
SHI_00023843-RA	2.98767	5.17229	0.000230574	Up	AT4G20840	Encodes an oligogalacturonide oxidase that inactivates the elicitor-active oligogalacturonides (OGs).	ATBBE21
SHI_00003153-RA	5.69307	8.37135	0.000235949	Up	AT3G47340	encodes a glutamine-dependent asparagine synthetase, the predicted ASN1 peptide contains a purF-type glutamine-binding domain, and is expressed predominantly in shoot tissues, where light has a negative effect on its mRNA accumulation. Expression is induced within 3 hours of dark treatment, in senescing leaves and treatment with exogenous photosynthesis inhibitor. Induction of gene expression was…	ASN1
SHI_00000244-RA	-5.37755	0.895876	0.000237135	Down	AT2G41130	Encodes STC8 (salt tolerant callus 8)/bHLH106 (basic helix-loop-helix transcription factor bHLH106). Knockout lines are more sensitive to NaCl, KCl, LiCl, ABA, and low temperatures than the wild-type.	BHLH106
SHI_00006175-RA	-3.82997	2.70125	0.000239459	Down	AT5G53190	Nodulin MtN3 family protein	SWEET3
SHI_00013805-RA	3.63544	3.33935	0.0002413	Up	AT3G53420	a member of the plasma membrane intrinsic protein subfamily PIP2. localizes to the plasma membrane and exhibits water transport activity in Xenopus oocyte. expressed specifically in the vascular bundles and protein level increases slightly during leaf dev. When expressed in yeast cells can conduct hydrogen peroxide into those cells.	PIP2A
SHI_00006400-RA	4.28622	3.74001	0.000242409	Up	AT1G52695	alpha/beta-Hydrolases superfamily protein	AT1G52695
SHI_00004623-RA	-4.37644	3.45731	0.000243701	Down	AT5G43060	Peptidase, activity detected in extracts of root, leaf and cell culture.	RD21B
SHI_00015365-RA	2.06212	2.53606	0.000250391	Up	AT1G80240	DUF642 gene	DGR1
SHI_00006433-RA	5.79047	0.584136	0.000252454	Up	AT4G38400	member of EXPANSIN-LIKE. Naming convention from the Expansin Working Group (Kende et al, 2004. Plant Mol Bio)	EXLA2
SHI_00001080-RA	2.34699	3.16861	0.00025371	Up	AT1G48980	2-oxoglutarate (2OG) and Fe(II)-dependent oxygenase superfamily protein	ALKBH9A
SHI_00001423-RA	2.32184	1.08673	0.000256319	Up	AT4G23800	Encodes a protein containing three copies of the HMG (high mobility group)-box domain. The two Arabidopsis 3xHMG-box proteins are: AT4G11080 (3xHMG-box1) and AT4G23800 (3xHMG-box2). Interacts with mitotic and meiotic chromosomes.	3XHMG-BOX2
SHI_00029132-RA	-2.1122	3.93633	0.000258361	Down	AT1G69990	Leucine-rich repeat protein kinase family protein	BIR4
SHI_00005503-RA	-2.63647	2.19485	0.000258536	Down	AT5G53660	Growth regulating factor encoding transcription activator. One of the nine members of a GRF gene family, containing nuclear targeting domain. Involved in leaf development and expressed in shoot and flower.	GRF7
SHI_00004735-RA	4.14992	1.71087	0.000260329	Up	AT2G33710	encodes a member of the ERF (ethylene response factor) subfamily B-4 of ERF/AP2 transcription factor family. The protein contains one AP2 domain. There are 7 members in this subfamily.	AT2G33710
SHI_00003893-RA	4.67049	1.72161	0.000261292	Up	AT1G35210	hypothetical protein	AT1G35210
SHI_00018970-RA	-2.37091	4.86021	0.000263643	Down	AT5G57780	Encodes a atypical member of the bHLH (basic helix-loop-helix) family transcriptional factors.	P1R1
SHI_00015082-RA	2.1877	2.69878	0.00026623	Up	AT3G16090	Encodes one of the Arabidopsis homologs of the yeast/human Hrd1 protein: AT3G16090 (Hrd1A), AT1G65040 (Hrd1B). Involved in ERAD (Endoplasmic reticulum-associated degradation).	HRD1A
SHI_00007009-RA	2.01307	4.32251	0.00026623	Up	AT1G22360	UDP-glucosyl transferase 85A2	UGT85A2
SHI_00021833-RA	-2.03209	3.63712	0.000270999	Down	AT2G25130	ARM repeat superfamily protein	AT2G25130
SHI_00000455-RA	-2.42144	3.19878	0.000275973	Down	AT3G18800	transmembrane protein	AT3G18800
SHI_00008597-RA	-3.13854	8.76259	0.000278103	Down	AT4G36570	RAD-like 3	RL3
SHI_00005014-RA	2.89315	1.16379	0.00027826	Up	AT2G26760	Cyclin B1	CYCB1;4
SHI_00027608-RA	-2.3231	4.89802	0.000279036	Down	AT1G63550	Receptor-like protein kinase-related family protein	AT1G63550
SHI_00018686-RA	-3.25409	3.93444	0.000283476	Down	AT3G21510	Encodes AHP1, one of the six Arabidopsis thaliana histidine phosphotransfer proteins (AHPs). AHPs function as redundant positive regulators of cytokinin signaling. Members of the AHP gene family include: AT3G21510 (AHP1), AT3G29350 (AHP2), AT5G39340 (AHP3), AT3G16360 (AHP4), AT1G03430 (AHP5) and AT1G80100 (AHP6).	AHP1
SHI_00001545-RA	-2.05785	1.88834	0.000285621	Down	AT5G57050	Encodes a protein phosphatase 2C and is involved in ABA signal transduction. Binds fibrillin preprotein in vitro and in vivo.	ABI2
SHI_00028065-RA	-2.0987	2.4742	0.000285896	Down	AT4G34350	Arabidopsis ISPH is involved in the plastid nonmevalonate pathway of isoprenoid biosynthesis. It was shown to complement the lethal phenotype of E. coli ispH mutant and is therefore most likely encodes a protein with 4-hydroxy-3-methylbut-2-en-1-yl diphosphate reductase activity involved in the last step of mevalonate-independent isopentenyl biosynthesis. Mutant has Albino seedling.	HDR
SHI_00006136-RA	2.1536	1.33938	0.000287539	Up	AT5G52640	Encodes a cytosolic heat shock protein AtHSP90.1. AtHSP90.1 interacts with disease resistance signaling components SGT1b and RAR1 and is required for RPS2-mediated resistance. The mRNA is cell-to-cell mobile.	HSP90.1
SHI_00008485-RA	-3.81061	1.28589	0.000287874	Down	AT5G49730	Encodes a plasma membrane-located ferric chelate reductase. Its mRNA is expressed in green aerial tissues (shoot, flower and cotyledon) in a light- and cell differentiation-specific manner.	FRO6
SHI_00001839-RA	-2.05736	9.6449	0.000296181	Down	AT4G23920	Encodes a protein with UDP-D-glucose 4-epimerase activity. Involved in growth and cell wall carbohydrate biosynthesis.	UGE2
SHI_00015023-RA	2.27145	2.62681	0.000297439	Up	AT1G26850	S-adenosyl-L-methionine-dependent methyltransferases superfamily protein	AT1G26850
SHI_00029136-RA	3.30969	1.70969	0.000299775	Up	AT1G73880	UDP-glucosyl transferase 89B1	UGT89B1
SHI_00000356-RA	-2.15796	3.61337	0.000306205	Down	AT4G38950	ATP binding microtubule motor family protein	AT4G38950
SHI_00007793-RA	-2.07892	3.28149	0.000306862	Down	AT3G01311	actin cross-linking protein, putative (DUF569)	AT3G01311
SHI_00024016-RA	-2.4613	2.58093	0.000310125	Down	AT1G28600	GDSL-motif esterase/acyltransferase/lipase. Enzyme group with broad substrate specificity that may catalyze acyltransfer or hydrolase reactions with lipid and non-lipid substrates.	AT1G28600
SHI_00029155-RA	2.93197	1.72642	0.000311012	Up	AT3G02920	Replication protein A, subunit RPA32	RPA32B
SHI_00008592-RA	-4.11556	2.36398	0.000316582	Down	AT4G14368	Regulator of chromosome condensation (RCC1) family protein	AT4G14368
SHI_00015546-RA	-2.27923	7.03343	0.000317474	Down	AT3G13690	kinase with adenine nucleotide alpha hydrolases-like domain-containing protein	AT3G13690
SHI_00014367-RA	-2.34158	0.703648	0.000317851	Down	AT3G22830	member of Heat Stress Transcription Factor (Hsf) family	HSFA6B
SHI_00030274-RA	4.76443	1.69969	0.000319932	Up	AT4G22620	SAUR-like auxin-responsive protein family	SAUR34
SHI_00025642-RA	2.36357	7.48179	0.000323122	Up	AT1G22410	Class-II DAHP synthetase family protein	AT1G22410
SHI_00008339-RA	3.91961	2.14372	0.000325256	Up	AT3G63480	Encodes a protein with sequence similarity to rice kinesin protein. Homozygous loss of function mutations have reduced seed set due to defects in megagametogenesis and reduced pollen viability.	KIN-1
SHI_00025708-RA	4.26236	1.43584	0.000328233	Up	AT1G75280	isoflavone reductase, putative, identical to SP:P52577 Isoflavone reductase homolog P3 (EC 1.3.1.-) {Arabidopsis thaliana}	AT1G75280
SHI_00014264-RA	-2.50267	2.42491	0.000328794	Down	AT3G58070	Putative transcription factor, contains C2H2 domain, regulates aspects of shoot maturation in Arabidopsis thaliana. GIS loss-of-function mutations affect the epidermal differentiation of inflorescence organs, causing a premature decrease in trichome production on successive leaves, stem internodes, and branches. Overexpression has the opposite effect on trichome initiation and causes other hetero…	GIS
SHI_00018713-RA	4.20301	0.664017	0.000331286	Up	AT5G19110	Eukaryotic aspartyl protease family protein	AT5G19110
SHI_00027984-RA	2.65984	0.742946	0.000339125	Up	AT5G25190	encodes a member of the ERF (ethylene response factor) subfamily B-6 of ERF/AP2 transcription factor family. The protein contains one AP2 domain. There are 12 members in this subfamily including RAP2.11.	ESE3
SHI_00010343-RA	3.05727	4.35297	0.000341771	Up	AT3G09270	Encodes glutathione transferase belonging to the tau class of GSTs. Naming convention according to Wagner et al. (2002).	GSTU8
SHI_00015726-RA	6.63515	0.536277	0.000341945	Up	AT5G34780	Putative ketopantoate reductase (KPR). This enzyme is speculated to be the missing enzyme in the biosynthesis of pantothenate.	AT5G34780
SHI_00018870-RA	2.40196	0.860325	0.00034756	Up	AT1G73590	Encodes an auxin efflux carrier involved in shoot and root development. It is involved in the maintenance of embryonic auxin gradients. Loss of function severely affects organ initiation, pin1 mutants are characterised by an inflorescence meristem that does not initiate any flowers, resulting in the formation of a naked inflorescence stem. PIN1 is involved in the determination of leaf shape by ac…	PIN1
SHI_00028870-RA	-2.59854	1.559	0.00034909	Down	AT2G34720	nuclear factor Y, subunit A4	NF-YA4
SHI_00011996-RA	2.15695	1.21402	0.000355173	Up	AT1G71930	Encodes a NAC-domain transcription factor with transcriptional activation activity that is involved in xylem formation. Induces transdifferentiation of various cells into protoxylem vessel elements. Located in the nucleus. Expression induced in the presence of auxin, cytokinin and brassinosteroids.	VND7
SHI_00024688-RA	2.74904	1.55796	0.000358694	Up	AT2G45350	Encodes a member of a PCMP (plant combinatorial and modular protein) family (PCMP-E subfamily) with 11 pentatricopeptide (PPR) repeats. The protein is involved in RNA editing of the initiation codon of ndhD in the chloroplast.	CRR4
SHI_00014974-RA	2.62903	4.44159	0.000358694	Up	AT1G59720	Pentatricopeptide Repeat Protein containing the DYW motif. Required for editing of multiple plastid transcripts. Endonuclease activity.	CRR28
SHI_00002509-RA	-2.38279	4.54351	0.000359795	Down	AT5G60890	Myb-like transcription factor that modulates expression of ASA1, a key point of control in the tryptophan pathway	MYB34
SHI_00007093-RA	-2.92929	5.01007	0.000370048	Down	AT1G58340	Encodes a plant MATE (multidrug and toxic compound extrusion) transporter that is localized to the Golgi complex and small organelles and is involved in determining the rate of organ initiation. It is also involved in iron homeostasis when plants are under osmotic stress.	ZF14
SHI_00025133-RA	-2.09505	1.52586	0.000373267	Down	AT3G52610	GATA zinc finger protein	AT3G52610
SHI_00016816-RA	3.82956	1.17302	0.000375165	Up	AT1G74580	Pentatricopeptide repeat (PPR) superfamily protein	AT1G74580
SHI_00014431-RA	2.66294	9.20538	0.000375911	Up	AT4G02380	Encodes AtLEA5 (late embryogenesis abundant like protein). Also known as SENESCENCE-ASSOCIATED GENE 21 (SAG21). Has a role on oxidative stress tolerance. mRNA levels are elevated in response to various stresses.	SAG21
SHI_00014888-RA	-2.42005	3.8576	0.000379275	Down	AT4G24450	phosphoglucan, water dikinase	PWD
SHI_00030338-RA	2.10908	7.99459	0.000380655	Up	AT1G77210	AtSTP14 belongs to the family of sugar transport proteins (AtSTPs)in volved in monosaccharide transport. Heterologous expression in yeast revealed that AtSTP14 is the transporter specifc for galactose and does not transport other monosaccharides such as glucose or fructose.	STP14
SHI_00003284-RA	3.95386	0.68416	0.000387688	Up	AT5G03520	GTPase that colocalizes with golgi and plasma membranes.	RAB8C
SHI_00029893-RA	2.19972	2.56293	0.000387818	Up	AT1G53840	encodes a pectin methylesterase	PME1
SHI_00011720-RA	4.56041	3.23346	0.000395169	Up	AT2G22860	Phytosulfokine 2 precursor, coding for a unique plant peptide growth factor. The mRNA is cell-to-cell mobile.	PSK2
SHI_00000475-RA	3.62557	2.07902	0.000395169	Up	AT2G07440	two-component responsive regulator-related / response regulator protein-like protein	AT2G07440
SHI_00016103-RA	2.34735	4.49864	0.000395859	Up	AT1G69580	Homeodomain-like superfamily protein	AT1G69580
SHI_00013697-RA	2.16627	1.16422	0.000401007	Up	AT4G18590	Nucleic acid-binding, OB-fold-like protein	RPA3B
SHI_00024700-RA	4.66031	5.89736	0.00040246	Up	AT5G08370	Member of Glycoside Hydrolase Family 27 (GH27)that functions as an &#945	AGAL2
SHI_00005096-RA	-2.64972	1.79661	0.000404579	Down	AT5G03760	encodes a beta-mannan synthase that is required for agrobacterium-mediated plant genetic transformation involves a complex interaction between the bacterium and the host plant. 3' UTR is involved in transcriptional regulation and the gene is expressed in the elongation zone of the root.	ATCSLA09
SHI_00024389-RA	3.02712	2.29589	0.000407168	Up	AT2G18465	Chaperone DnaJ-domain superfamily protein	DJC72
SHI_00008809-RA	-2.27091	6.82726	0.000412316	Down	AT2G15020	hypothetical protein	AT2G15020
SHI_00018163-RA	4.17192	5.36897	0.000417496	Up	AT4G25810	xyloglucan endotransglycosylase-related protein (XTR6)	XTR6
SHI_00006514-RA	-2.8566	3.39615	0.000418171	Down	AT5G26010	Protein phosphatase 2C family protein	AT5G26010
SHI_00002326-RA	2.22267	0.958054	0.00042165	Up	AT5G14890	potassium transporter	AT5G14890
SHI_00016491-RA	2.38613	0.882915	0.000422453	Up	AT1G67630	DNA polymerase alpha 2	POLA2
SHI_00003972-RA	2.06659	4.94417	0.000423906	Up	AT1G79280	Encodes a 237-kDA protein with similarity to vertebrate Tpr, a long coiled-coil proteins of nuclear pore inner basket filaments. It is localized to the inner surface of the nuclear envelope and is a component of the nuclear pore-associated steps of sumoylation and mRNA export in plants. Mutations affect flowering time regulation and other developmental processes. Probably acts in the same pathway…	NUA
SHI_00024303-RA	4.34452	0.681441	0.000452012	Up	AT5G25910	putative disease resistance protein induced by chitin oligomers.	RLP52
SHI_00028593-RA	-2.17066	5.72636	0.000457685	Down	AT5G20150	Expression is upregulated in the shoot of cax1/cax3 mutant. Additionally, its expression is responsive to both phosphate (Pi) and phosphite (Phi) in both roots and shoots. The mRNA is cell-to-cell mobile.	SPX1
SHI_00006092-RA	-2.53675	3.11625	0.000457685	Down	AT1G10610	basic helix-loop-helix (bHLH) DNA-binding superfamily protein	AT1G10610
SHI_00020087-RA	2.94436	3.98626	0.000457685	Up	AT4G27460	Cystathionine beta-synthase (CBS) family protein	CBSX5
SHI_00007220-RA	-2.16799	4.12872	0.000457851	Down	AT1G56020	serine/arginine repetitive matrix-like protein	AT1G56020
SHI_00002652-RA	3.32262	2.35044	0.000461686	Up	AT4G37690	Unlike its close paralog MUCI10 (At2g22900), GT6 is not required for the biosynthesis of seed coat mucilage. GT6 is preferentially expressed in sub-epidermal cell layers of the seed coat.	GT6
SHI_00022001-RA	-2.91976	2.02727	0.000470294	Down	AT2G26700	Member of AGC VIIIa Kinase gene family. Encodes PID2, a homolog of PID. Simultaneous disruption of PID(AT2G34650) and its 3 closest homologs (PID2/AT2G26700, WAG1/AT1G53700, and WAG2/AT3G14370) abolishes the formation of cotyledons.	PID2
SHI_00001987-RA	3.07398	1.8992	0.000485963	Up	AT3G49240	Encodes NUWA, an imprinted gene that controls mitochondrial function in early seed development. It is expressed in both the mitochondrion and chloroplast and is also involved in RNA editing in the mitochondrion and chloroplast as a core member of E+-type PPR editosomes.	NUWA
SHI_00021431-RA	2.03015	1.52191	0.00048877	Up	AT1G66852	Carbohydrate-binding X8 domain superfamily protein	AT1G66852
SHI_00022679-RA	-3.18296	4.94539	0.000494874	Down	AT4G14970	Encodes a protein that is required for meiotic homologous recombination and acts in parallel to both MUTS HOMOLOG 4 (AtMSH4), known for its role in promoting interfering cross-overs (COs) and MMS AND UV SENSITIVE 81 (AtMUS81), known for its role in the formation of non-interfering COs.	ATFANCD2
SHI_00011450-RA	2.59321	0.813946	0.000505923	Up	AT2G39900	Encodes a member of the Arabidopsis LIM proteins: a family of actin bundlers with distinct expression patterns. WLIM1, WLIM2a, and WLIM2b are widely expressed, whereas PLIM2a, PLIM2b, and PLIM2c are predominantly expressed in pollen. Regulates actin cytoskeleton organization.	WLIM2A
SHI_00002243-RA	3.6509	2.02175	0.000510914	Up	AT3G17420	Serine/threonine protein kinase-like protein expressed in etiolated cotyledons and found in glyoxysomes.	GPK1
SHI_00003763-RA	3.68913	0.642021	0.000522011	Up	AT5G38690	Zinc-finger domain of monoamine-oxidase A repressor R1 protein	DDR1
SHI_00007159-RA	2.40771	8.50663	0.000525236	Up	AT5G67090	Encodes a subtilisin-like serine protease with in vitro protease activity.	SBT1.9
SHI_00010597-RA	3.62435	0.533113	0.000528026	Up	AT4G25940	ENTH/ANTH/VHS superfamily protein	PICALM2B
SHI_00020757-RA	-2.51906	1.69718	0.000535087	Down	AT1G25250	Encodes a transcription factor that, together with IDD14 and IDD15, regulates auxin biosynthesis and transport and thus aerial organ morphogenesis and gravitropic responses . IDD16 also binds to the SPCH promoter and regulates stomata initiation.	ID
SHI_00003761-RA	2.04998	7.95016	0.000554831	Up	AT1G13280	Encodes allene oxide cyclase. One of four genes in Arabidopsis that encode this enzyme, which catalyzes an essential step in jasmonic acid biosynthesis. Gene expression is reduced during senescence, a process that involves jasmonic acid signalling pathway.	AOC4
SHI_00030768-RA	-2.64473	0.591948	0.00056019	Down	AT2G46440	Member of Cyclic nucleotide gated channel family. Positive regulator of resistance against avirulent fungal pathogen. The mRNA is cell-to-cell mobile.	CNGC11
SHI_00025185-RA	2.22088	1.64444	0.000560285	Up	AT2G36770	UDP-Glycosyltransferase superfamily protein	AT2G36770
SHI_00019064-RA	2.2781	1.40104	0.000563876	Up	AT5G05160	Encodes a receptor-like kinase that activates secondary growth, the production of secondary vascular tissues.	RUL1
SHI_00018259-RA	3.18752	2.11145	0.0005827	Up	AT1G64670	Encodes a epidermally expressed extracellular protein that likely functions as an alpha-beta hydrolase and is required for normal cuticle formation. Homozygous mutant plants are dwarfed and have abnormal leaves, collapsed cells, reduced numbers of trichomes. The specific role of BDG is unclear: it may function in cutin biosynthesis or as a cross-linking enzyme in the cell wall itself.	BDG1
SHI_00005269-RA	6.49065	3.20068	0.0005827	Up	AT4G35160	Encodes a cytosolic N-acetylserotonin O-methyltransferase that can convert N-acetylserotonin to melatonin and serotonin to 5-methoxytryptamine in the process of melatonin synthesis. It does not have caffeic acid O- methyltransferase activity.	ASMT
SHI_00030570-RA	-2.4403	2.24781	0.000586937	Down	AT1G08320	bZIP transcription factor family protein	TGA
SHI_00009864-RA	2.15074	2.79077	0.000593459	Up	AT1G59590	ZCF37 mRNA, complete cds The mRNA is cell-to-cell mobile.	ZCF37
SHI_00024471-RA	2.91754	2.9883	0.000611049	Up	AT5G44635	minichromosome maintenance (MCM2/3/5) family protein	MCM6
SHI_00004152-RA	4.57863	0.793978	0.000615258	Up	AT3G15530	S-adenosyl-L-methionine-dependent methyltransferases superfamily protein	AT3G15530
SHI_00009726-RA	-2.41555	9.73376	0.000616989	Down	AT5G17450	Heavy metal transport/detoxification superfamily protein	HIPP21
SHI_00010868-RA	3.32867	1.28123	0.000624552	Up	AT3G54750	downstream neighbor of Son	AT3G54750
SHI_00027662-RA	-3.88168	1.12983	0.000626807	Down	AT1G12140	belongs to the flavin-monooxygenase (FMO) family, encodes a glucosinolate S-oxygenase that catalyzes the conversion of methylthioalkyl glucosinolates to methylsulfinylalkyl glucosinolates	FMO GS-OX5
SHI_00024968-RA	2.43699	1.76468	0.000632592	Up	AT5G62550	microtubule-associated futsch-like protein	AT5G62550
SHI_00026749-RA	-2.18822	2.99979	0.000636267	Down	AT1G77920	bZIP transcription factor family protein	TGA7
SHI_00009186-RA	-2.13264	6.37018	0.000639618	Down	AT1G44446	Encodes chlorophyllide <i>a</i> oxygenase which converts chlorophyllide <i>a</i> to chlorophyllide <i>b</i> by catalyzing two successive hydroxylations at the 7-methyl group of chlorophyllide <i>a</i> . Mutants are deficient in pigments that associate with thylakoid membrane proteins, lacking chlorophyll <i>b</i> and light-harvesting proteins of photosystem II. The protein was shown through cross…	CH1
SHI_00013417-RA	2.43026	5.4659	0.000647291	Up	AT1G18270	ketose-bisphosphate aldolase class-II family protein	AT1G18270
SHI_00009829-RA	2.24506	2.44821	0.000650358	Up	AT1G46480	Encodes WOX4, a WUSCHEL-related homeobox gene family member with 65 amino acids in its homeodomain. Proteins in this family contain a sequence of eight residues (TLPLFPMH) downstream of the homeodomain called the WUS box. This protein also contains an acidic domain approximately 10 residues upstream of the WUS box. Part of the TDIF-TDR-WOX4 signaling pathway that plays a crucial role in the maint…	WOX4
SHI_00005453-RA	2.4619	1.15195	0.000655647	Up	AT1G10780	F-box/RNI-like superfamily protein	AT1G10780
SHI_00028134-RA	-2.52361	5.15789	0.000659313	Down	AT5G66440	tRNA-methyltransferase non-catalytic subunit trm6MTase subunit	AT5G66440
SHI_00026847-RA	2.04656	2.38809	0.000661484	Up	AT1G76430	Encodes Pht1	PHT1;9
SHI_00003262-RA	-2.20719	2.6898	0.000663123	Down	AT2G46660	Encodes a member of CYP78A cytochrome P450 monooxygenase protein family that is required in the sporophytic tissue of the mother plant to promote seed growth.	CYP78A6
SHI_00007381-RA	-2.06854	6.52164	0.000675839	Down	AT4G26860	Putative pyridoxal phosphate-dependent enzyme, YBL036C type	AT4G26860
SHI_00006389-RA	2.53248	7.17572	0.000678068	Up	AT4G31800	Pathogen-induced transcription factor. Binds W-box sequences in vitro. Forms protein complexes with itself and with WRKY40 and WRKY60. Constitutive expression of WRKY18 enhanced resistance to P. syringae, but its coexpression with WRKY40 or WRKY60 made plants more susceptible to both P. syringae and B. cinerea. WRKY18, WRKY40, and WRKY60 have partially redundant roles in response to the hemibiotr…	WRKY18
SHI_00026854-RA	2.58022	3.45954	0.000682913	Up	AT1G20925	Member of family of proteins that are similar to PIN auxin transporter.	PILS1
SHI_00025485-RA	-2.025	2.37125	0.000700348	Down	AT3G07500	Encodes one of four FRS (FAR1-RELATED SEQUENCE) factor-like genes in Arabidopsis. FRS factors are characterized by having an N-terminal C2H2-type chelating motif of the WRKY- Glial Cell Missing1 family, a central core transposase domain of Mutator-like element transposases, and a C-terminal SWIM domain. The four FRF-like genes in Arabidopsis share only the N-terminal motif with FRS proteins.	FRF2
SHI_00027578-RA	3.39598	3.90902	0.00070117	Up	AT2G01300	mediator of RNA polymerase II transcription subunit	AT2G01300
SHI_00023590-RA	-2.59356	9.19223	0.000705547	Down	AT4G21960	Encodes AT4g21960 (AT4g21960/T8O5_170). The mRNA is cell-to-cell mobile.	PRXR1
SHI_00013102-RA	4.7171	0.84556	0.000709918	Up	AT1G12220	Resistance gene, mediates resistance against the bacterial pathogen Pseudomonas syringae. Contains a putative nucleotide binding site composed of kinase-1a (or P-loop), kinase-2a, and putative kinase-3a domains, 13 imperfect leucine-rich repeats, a potential leucine zipper, and two uncharacterized motifs that are well conserved in products of previously isolated R genes. Confers resistance to Pse…	RPS5
SHI_00018054-RA	3.00717	0.925993	0.000711722	Up	AT3G13980	SKI/DACH domain protein	BG4
SHI_00011001-RA	3.63552	4.23603	0.000712531	Up	AT2G40330	Encodes a member of the PYR (pyrabactin resistance )/PYL(PYR1-like)/RCAR (regulatory components of ABA receptor) family proteins with 14 members. PYR/PYL/RCAR family proteins function as abscisic acid sensors. Mediate ABA-dependent regulation of protein phosphatase 2Cs ABI1 and ABI2.	PYL6
SHI_00018126-RA	3.478	1.17147	0.00071576	Up	AT5G48400	member of Putative ligand-gated ion channel subunit family	ATGLR1.2
SHI_00006426-RA	4.54109	3.0391	0.000717736	Up	AT1G80340	Encodes a protein with gibberellin 3 &#946	GA3OX2
SHI_00027554-RA	2.64181	2.4287	0.000719654	Up	AT1G25390	Protein kinase superfamily protein	LRK10L4
SHI_00015129-RA	2.31147	1.21881	0.00072274	Up	AT1G26330	DNA binding protein	AT1G26330
SHI_00014451-RA	4.05194	6.79779	0.000723779	Up	AT5G38700	cotton fiber protein	AT5G38700
SHI_00007478-RA	3.22462	0.793314	0.000723779	Up	AT5G25090	early nodulin-like protein 13	ENODL13
SHI_00027447-RA	-3.80702	8.73213	0.000726412	Down	AT3G47470	Encodes a chlorophyll a/b-binding protein that is more similar to the PSI Cab proteins than the PSII cab proteins. The predicted protein is about 20 amino acids shorter than most known Cab proteins.	LHCA4
SHI_00027867-RA	3.73732	1.50849	0.000746244	Up	AT5G63490	CBS / octicosapeptide/Phox/Bemp1 (PB1) domains-containing protein	AT5G63490
SHI_00029997-RA	2.83219	6.13382	0.000754501	Up	AT5G07580	encodes a member of the ERF (ethylene response factor) subfamily B-3 of ERF/AP2 transcription factor family. The protein contains one AP2 domain. There are 18 members in this subfamily including ATERF-1, ATERF-2, AND ATERF-5.	ERF106
SHI_00016642-RA	2.55325	3.30453	0.000755037	Up	AT3G02125	pinin-like protein	AT3G02125
SHI_00022248-RA	2.56671	0.530591	0.00075649	Up	AT2G32590	condensin complex subunit	EMB2795
SHI_00011862-RA	3.0971	0.871761	0.000760982	Up	AT2G28380	Encodes a cytoplasmic dsRNA-binding protein DRB2. A maternally expressed imprinted gene. DRB2 and DRB4 have an antagonistic impact on polymerase IV-dependent siRNA levels.	DRB2
SHI_00025498-RA	2.07005	2.89728	0.000770663	Up	AT2G43130	encodes a protein belonging to the Rab/Ypt family of small GTPases, which are implicated in intracellular vesicular traffic.	ARA4
SHI_00004844-RA	2.48168	8.50865	0.000774763	Up	AT4G39980	Encodes a 2-deoxy-D-arabino-heptulosonate 7-phosphate (DAHP) synthase, which catalyzes the first committed step in aromatic amino acid biosynthesis. Gene expression is induced by wounding and pathogenic bacteria Pseudomonas syringae. The mRNA is cell-to-cell mobile.	DHS1
SHI_00007564-RA	2.0219	3.58991	0.000783725	Up	AT1G61210	DWA3 encodes a DWD(DDB1 binding WD40) protein. Invitro analyses suggest its involvement in the negative regulation of ABA responses.One of four katanin p80 subunits. Involved in targeting of katanin complex to crossover and branch points to properly sever microtubules.	DWA3
SHI_00014142-RA	-3.22062	1.06157	0.000788303	Down	AT3G61250	LATE MERISTEM IDENTITY2 (LMI2) is a target of the meristem identity regulator LEAFY (LFY). Has a role in the meristem identity transition from vegetative growth to flowering. Member of the R2R3 factor gene family.	MYB17
SHI_00001247-RA	-2.05346	8.96393	0.00079678	Down	AT5G63030	Thioredoxin superfamily protein, redox sensor.	GRXC1
SHI_00022810-RA	5.05737	4.09607	0.000809959	Up	AT4G13580	Disease resistance-responsive (dirigent-like protein) family protein	AT4G13580
SHI_00016914-RA	2.01957	2.83303	0.000810483	Up	AT5G04700	Ankyrin repeat family protein	AT5G04700
SHI_00022949-RA	-2.12599	4.48999	0.000810729	Down	AT5G40500	hypothetical protein	AT5G40500
SHI_00005348-RA	2.83195	2.20123	0.000818678	Up	AT2G14860	Peroxisomal membrane 22 kDa (Mpv17/PMP22) family protein	AT2G14860
SHI_00021225-RA	-2.2423	8.88813	0.000819372	Down	AT2G26080	glycine decarboxylase P-protein 2	GLDP2
SHI_00009277-RA	-2.26234	5.97201	0.000838028	Down	AT1G75900	GDSL-motif esterase/acyltransferase/lipase. Enzyme group with broad substrate specificity that may catalyze acyltransfer or hydrolase reactions with lipid and non-lipid substrates.	AT1G75900
SHI_00013230-RA	-2.55264	2.03666	0.000853189	Down	AT4G10780	LRR and NB-ARC domains-containing disease resistance protein	AT4G10780
SHI_00019473-RA	-2.16586	3.41344	0.000859788	Down	AT1G17870	S2P-like putative metalloprotease, also contain transmembrane helices near their C-termini and many of them, five of seven, contain a conserved zinc-binding motif HEXXH. Homolog of EGY1. Each of the EGY1 and EGY-like proteins share two additional highly conserved motifs, the previously reported NPDG motif (aa 442?454 in EGY1, Rudner et al., 1999) and a newly defined GNLR motif (aa 171?179 in EGY1…	EGY3
SHI_00023390-RA	-3.33247	0.950299	0.000869864	Down	AT5G67430	Acyl-CoA N-acyltransferases (NAT) superfamily protein	AT5G67430
SHI_00010893-RA	3.21631	2.42945	0.000872161	Up	AT2G37980	O-fucosyltransferase family protein	AT2G37980
SHI_00007264-RA	-2.45196	10.0812	0.000886063	Down	AT3G27190	One of the homologous genes predicted to encode proteins with UPRT domains (Uracil phosphoribosyltransferase). Five of these genes (At5g40870, At3g27190, At1g55810, At4g26510 and At3g27440) show a high level of identity, and are annotated as also containing a N-terminal uracil kinase (UK) domain. These genes are referred to as UKL1 (UK-like 1), UKL2, UKL3, UKL4 and UKL5, respectively.	UKL2
SHI_00023006-RA	3.33907	1.24093	0.000892135	Up	AT3G50930	Encodes a protein that is present in a homo-multimeric protein complex on the outer mitochondrial membrane and plays a role in cell death and amplifying salicylic acid signalling. The mRNA is cell-to-cell mobile.	BCS1
SHI_00016951-RA	2.0057	3.59248	0.000892604	Up	AT4G20460	NAD(P)-binding Rossmann-fold superfamily protein	AT4G20460
SHI_00028642-RA	-2.82768	5.10881	0.00090575	Down	AT2G19580	Member of TETRASPANIN family	TET2
SHI_00029832-RA	2.57069	0.986809	0.00090575	Up	AT1G72670	Member of IQ67 (CaM binding) domain containing family.	IQD8
SHI_00028974-RA	2.96446	0.667815	0.000922179	Up	AT1G35625	RING/U-box superfamily protein	AT1G35625
SHI_00017496-RA	2.72393	3.30338	0.000922179	Up	AT1G07570	Protein kinase capable of phosphorylating tyrosine, serine, and threonine residues	APK1A
SHI_00014509-RA	-2.58313	1.60385	0.000924996	Down	AT3G10870	Encodes a methyl IAA esterase. Methyl IAA is believed to be an inactive form of auxin that needs to be demethylated to exert a biological effect. MES17 does not act on methyl JA, MeSA, MeGA4, or MEGA9 in vitro. This gene is expressed in several tissues of seedlings and adult plants, with a higher relative level of expression in the seedling shoot apex and the adult stem.	MES17
SHI_00029168-RA	-2.41549	2.0294	0.000927334	Down	AT2G41170	F-box family protein	AT2G41170
SHI_00010005-RA	-2.2795	0.620684	0.000929969	Down	AT5G42960	outer envelope pore 24B-like protein	AT5G42960
SHI_00021848-RA	3.35377	0.660745	0.000934197	Up	AT4G18650	A maternally expressed imprinted gene in the endosperm. It's expression is positively regulated by ROS1.	DOGL4
SHI_00006343-RA	-2.45938	4.35638	0.000944876	Down	AT5G57685	Encodes a member of the GDU (glutamine dumper) family proteins involved in amino acid export: At4g31730 (GDU1), At4g25760 (GDU2), At5g57685 (GDU3), At2g24762 (GDU4), At5g24920 (GDU5), At3g30725 (GDU6) and At5g38770 (GDU7).	GDU3
SHI_00022063-RA	3.06545	7.46819	0.000944905	Up	AT1G13140	member of CYP86C	CYP86C3
SHI_00013662-RA	-4.99291	3.86871	0.000944905	Down	AT3G52540	ovate family protein 18	OFP18
SHI_00017062-RA	5.43134	6.59032	0.000961163	Up	AT4G29260	VSP3 is a secreted acid phosphatase.	VSP3
SHI_00025588-RA	2.28669	1.08453	0.00100419	Up	AT4G37450	AGP18 is a lysine-rich arabinogalactan-protein (AGP) and part of a multi-gene family of glycoproteins with approx. 50 members. It falls into one subclass with AGP17 and AGP19, other lysine-rich AGPs. It is expressed in young leaves, shoots, roots and flowers and is active in the regulation of the selection and survival of megaspores.	AGP18
SHI_00027138-RA	2.19821	1.17066	0.00101038	Up	AT2G42390	kinase C substrate, heavy chain-like protein	AT2G42390
SHI_00004412-RA	-2.2783	0.496349	0.00101153	Down	AT2G41150	plant/protein	AT2G41150
SHI_00021420-RA	2.27808	3.47577	0.00101183	Up	AT5G47960	Encodes a small molecular weight g-protein.	RABA4C
SHI_00000673-RA	2.52836	0.92117	0.00102242	Up	AT4G01420	Encodes calcineurin B-like protein 5 (CBL5). Overexpression confers tolerance to drought and salt stress.	CBL5
SHI_00008720-RA	3.4684	7.55531	0.00104795	Up	AT2G15760	calmodulin-binding protein (DUF1645)	AT2G15760
SHI_00021320-RA	-3.40205	4.37888	0.00105094	Down	AT2G30630	P-loop containing nucleoside triphosphate hydrolases superfamily protein	AT2G30630
SHI_00015875-RA	-6.84597	1.52926	0.00105278	Down	AT1G34355	Encodes PS1 (Parallel Spindle 1). Mutations in PS1 lead to diploid male spores, diploid pollen grains, and spontaneous triploid plants in the next generation. Female meiosis is not affected in the mutants.	PS1
SHI_00003423-RA	-2.12921	1.50025	0.00106557	Down	AT3G11600	One of two plant specific paralogs of unknown function. Interacts with GL2. GIR1/GIR2 loss of function resembles gl2 lof mutations.	GIR2
SHI_00022906-RA	3.60037	0.803559	0.00107146	Up	AT3G22920	Cyclophilin-like peptidyl-prolyl cis-trans isomerase family protein	AT3G22920
SHI_00015171-RA	-2.79301	4.31191	0.00108194	Down	AT2G03250	EXS (ERD1/XPR1/SYG1) family protein	AT2G03250
SHI_00027760-RA	3.37744	0.819498	0.00108808	Up	AT5G57625	CAP (Cysteine-rich secretory proteins, Antigen 5, and Pathogenesis-related 1 protein) superfamily protein	ATCAPE5
SHI_00016156-RA	-2.78464	1.92111	0.00110915	Down	AT1G24020	MLP-like protein 423	MLP423
SHI_00014695-RA	2.81039	6.88794	0.00111099	Up	AT1G51680	encodes an isoform of 4-coumarate:CoA ligase (4CL), which is involved in the last step of the general phenylpropanoid pathway. In addition to 4-coumarate, it also converts ferulate. The catalytic efficiency was in the following (descending) order: p-coumaric acid, ferulic acid, caffeic acid and 5-OH-ferulic acid. At4CL1 was unable to use sinapic acid as substrate.	4CL1
SHI_00015801-RA	2.11617	4.32881	0.00111747	Up	AT5G08640	Encodes a flavonol synthase that catalyzes formation of flavonols from dihydroflavonols. Co-expressed with CHI and CHS (qRT-PCR).	FLS1
SHI_00013855-RA	2.3843	1.76688	0.00112013	Up	AT5G02400	Encodes a protein with similarity to the POL locus which is a novel protein phosphatase 2C. Ubiquitously expressed. No phenotype observed in homozygous null mutant background.	PLL2
SHI_00002373-RA	2.16269	2.74505	0.00112896	Up	AT1G24400	High-affinity transporter for neutral and acidic amino acids, expressed in tapetum tissue of anthers. Transport of 1-Aminocyclopropane-1-carboxylic acid (ACC).	LHT2
SHI_00012202-RA	2.84535	1.52228	0.00114115	Up	AT3G30280	HXXXD-type acyl-transferase family protein	AT3G30280
SHI_00007585-RA	2.84351	3.29553	0.00114743	Up	AT5G35750	Encodes histidine kinase AHK2.	HK2
SHI_00026506-RA	-2.18664	2.3722	0.00115303	Down	AT1G09935	Phosphoglycerate mutase family protein	AT1G09935
SHI_00003126-RA	2.3044	3.41262	0.00116343	Up	AT2G45440	Encodes a protein that likely has dihydropicolinate synthase activity based on its mutant phenotype of decreased lysine levels and increased aspartate levels. The mutant also has increased levels of threonine. The enzyme is predicted to localize to the chloroplast.	DHDPS2
SHI_00021343-RA	2.43834	1.33893	0.00116563	Up	AT2G44580	zinc ion binding protein	AT2G44580
SHI_00007143-RA	-3.90239	1.99627	0.00118445	Down	AT5G10600	member of CYP81K	CYP81K2
SHI_00014584-RA	2.20083	3.00248	0.0011869	Up	AT1G27950	Encodes LTPG1, a lipid transfer protein with a predicted GPI (glycosylphosphatidylinositol)-anchor domain. Localized in the plasma membrane. Disruption of the LTPG1 gene causes alterations of cuticular lipid composition, but no significant changes on total wax and cutin monomer loads are seen. The mRNA is cell-to-cell mobile.	LTPG1
SHI_00014589-RA	2.18374	3.72149	0.00119207	Up	AT5G50570	Squamosa promoter-binding protein-like (SBP domain) transcription factor family protein	SPL13A
SHI_00023900-RA	2.19137	2.07691	0.00121795	Up	AT2G34070	Encodes a member of the TBL (TRICHOME BIREFRINGENCE-LIKE) gene family containing a plant-specific DUF231 (domain of unknown function) domain. TBL gene family has 46 members, two of which (TBR/AT5G06700 and TBL3/AT5G01360) have been shown to be involved in the synthesis and deposition of secondary wall cellulose, presumably by influencing the esterification state of pectic polymers. A nomenclature…	TBL37
SHI_00009219-RA	3.78785	1.12632	0.00122654	Up	AT1G77120	Catalyzes the reduction of acetaldehyde using NADH as reductant. Requires zinc for activity. Dimer. Anaerobic response polypeptide (ANP). Fermentation. The protein undergoes thiolation following treatment with the oxidant tert-butylhydroperoxide. The mRNA is cell-to-cell mobile.	ADH1
SHI_00005518-RA	4.46445	0.507949	0.00122656	Up	AT2G28160	Encodes a putative transcription factor that regulates iron uptake responses. mRNA is detected in the outer cell layers of the root and accumulates in response to iron deficiency. The expression of many iron-regulated genes is dependent on FIT1. It specifically regulates FRO2 at the level of mRNA accumulation and IRT1 at the level of protein accumulation.Similar to FER in tomato and is a regulato…	FIT
SHI_00020845-RA	3.46038	1.67952	0.00123001	Up	AT2G42610	LIGHT-DEPENDENT SHORT HYPOCOTYLS-like protein (DUF640)	LSH10
SHI_00026737-RA	4.25487	3.32025	0.00125186	Up	AT2G22190	Haloacid dehalogenase-like hydrolase (HAD) superfamily protein	TPPE
SHI_00016520-RA	-2.59117	5.33255	0.00126267	Down	AT3G61035	Cytochrome P450 superfamily protein	AT3G61035
SHI_00006936-RA	5.89384	4.87669	0.00128833	Up	AT5G65600	Concanavalin A-like lectin protein kinase family protein	LECRK-IX.2
SHI_00029567-RA	5.95181	1.90456	0.00132033	Up	AT5G05290	Encodes an expansin. Naming convention from the Expansin Working Group (Kende et al, 2004. Plant Mol Bio)	EXPA2
SHI_00007044-RA	-2.19984	5.85411	0.00133709	Down	AT5G64550	loricrin-like protein	AT5G64550
SHI_00007626-RA	-2.07245	6.4096	0.00134208	Down	AT1G70690	Encodes a plasmodesmal protein that may be involved in the intercellular movement of molecules through the plasmodesmata. The protein has two DUF26 domains and a single transmembrane domain.	HWI1
SHI_00030940-RA	-5.97317	2.58279	0.0013614	Down	AT3G43110	transmembrane protein	AT3G43110
SHI_00018348-RA	2.5673	5.53215	0.00136161	Up	AT3G16860	COBRA-like protein 8 precursor	COBL8
SHI_00028232-RA	3.10574	3.51125	0.00136694	Up	AT3G13650	Disease resistance-responsive (dirigent-like protein) family protein	AT3G13650
SHI_00028283-RA	2.16918	1.12648	0.00138449	Up	AT5G40820	Encodes a Arabidopsis ortholog of the ATR protein kinase that is involved in a wide range of responses to DNA damage and plays a central role in cell-cycle regulation. Dominant loss of function alleles identified as suppressors of ALS also exhibit increased tolerance to aluminum. This may be due to the inhibition of terminal differentiation of the root apex upon exposure to Al.	ATR
SHI_00019116-RA	-2.03064	2.46842	0.00140771	Down	AT1G74810	HCO3- transporter family	BOR5
SHI_00019418-RA	-2.25053	4.14743	0.00140904	Down	AT5G43440	encodes a protein whose sequence is similar to ACC oxidase	AT5G43440
SHI_00007855-RA	-2.42947	1.64385	0.00140984	Down	AT1G67880	beta-1,4-N-acetylglucosaminyltransferase family protein	AT1G67880
SHI_00023070-RA	2.50277	7.56526	0.00144177	Up	AT4G39640	The gene encodes a gamma-glutamyltransferase (AKA gamma-glutamyl transpeptidase, EC 2.3.2.2) that is located in vascular tissues (predominantly phloem) of leaves and is involved in the degradation of glutathione. The encoded enzyme also mitigates oxidative stress by metabolizing GSSG (oxidized form of GSH - glutathione) in the apoplast.	GGT1
SHI_00029305-RA	-2.86791	3.15492	0.00144177	Down	AT1G01680	plant U-box 54	PUB54
SHI_00006402-RA	4.44659	2.60908	0.00145361	Up	AT3G26300	putative cytochrome P450	CYP71B34
SHI_00017190-RA	-2.10889	5.99951	0.00145669	Down	AT1G53880	translation initiation factor eIF-2B subunit alpha	AT1G53880
SHI_00004385-RA	-3.16256	4.92689	0.00145888	Down	AT1G79110	Encodes one of the BRGs (BOI-related gene) involved in resistance to Botrytis cinerea.	BRG2
SHI_00029789-RA	-2.93944	1.77767	0.00146232	Down	AT3G16130	Encodes a member of KPP-like gene family, homolog of KPP (kinase partner protein) gene in tomato. Also a member of the RopGEF (guanine nucleotide exchange factor) family, containing the novel PRONE domain (plant-specific Rop nucleotide exchanger), which is exclusively active towards members of the Rop subfamily.	RHO OF PLANTS
SHI_00001587-RA	-3.43623	2.16784	0.00147079	Down	AT3G29350	Encodes AHP2, one of the six Arabidopsis thaliana histidine phosphotransfer proteins (AHPs). AHPs function in His-to-Asp phosphorelay signal transduction and as redundant positive regulators of cytokinin signaling. Members of the AHP gene family include: AT3G21510 (AHP1), AT3G29350 (AHP2), AT5G39340 (AHP3), AT3G16360 (AHP4), AT1G03430 (AHP5) and AT1G80100 (AHP6).	AHP2
SHI_00006443-RA	-2.00038	1.33447	0.00147155	Down	AT2G25690	DUF581 family protein, putative (DUF581)	AT2G25690
SHI_00011202-RA	-2.67762	5.39866	0.001473	Down	AT2G30010	Encodes a member of the TBL (TRICHOME BIREFRINGENCE-LIKE) gene family containing a plant-specific DUF231 (domain of unknown function) domain. TBL gene family has 46 members, two of which (TBR/AT5G06700 and TBL3/AT5G01360) have been shown to be involved in the synthesis and deposition of secondary wall cellulose, presumably by influencing the esterification state of pectic polymers. A nomenclature…	TBL45
SHI_00014734-RA	2.01993	5.5011	0.001473	Up	AT2G46620	P-loop containing nucleoside triphosphate hydrolases superfamily protein	AT2G46620
SHI_00021153-RA	-3.82402	1.66827	0.00147436	Down	AT4G22070	member of WRKY Transcription Factor	WRKY31
SHI_00016628-RA	2.31528	1.72369	0.00150502	Up	AT4G23130	Encodes a receptor-like protein kinase. Naming convention from Chen et al 2003 (PMID 14756307)	RECEPTOR-LIKE PROTEIN KINASE
SHI_00000856-RA	-2.2759	3.15635	0.00152078	Down	AT1G12110	Encodes NRT1.1 (CHL1), a dual-affinity nitrate transporter. The protein is expressed in guard cells and function in stomatal opening. Mutants have less transpiration and are more tolerant to drought. Expressed in lateral roots. Involved in nitrate signaling which enables the plant root system to detect and exploit nitrate-rich soil patches. Comparing to the wild type, the mutant displays a strong…	NPF6.3
SHI_00009717-RA	2.41107	2.11781	0.0015378	Up	AT1G34110	Leucine-rich receptor-like protein kinase family protein	RGI5
SHI_00021680-RA	-2.73993	2.5587	0.00153782	Down	AT1G51990	O-methyltransferase family protein	AT1G51990
SHI_00030941-RA	-7.59787	5.50285	0.00153782	Down	AT4G25260	Plant invertase/pectin methylesterase inhibitor superfamily protein	PMEI7
SHI_00015190-RA	-2.07237	5.19333	0.00154716	Down	AT3G61820	Eukaryotic aspartyl protease family protein	AT3G61820
SHI_00007609-RA	2.50033	2.22561	0.00155786	Up	AT1G14810	encodes an aspartate semialdehyde dehydrogenase, which produces the branch point intermediate for lysine and threonine/methionine biosynthesis	AT1G14810
SHI_00003326-RA	2.82063	7.65324	0.00156585	Up	AT2G37040	Encodes PAL1, a phenylalanine ammonia-lyase. Arabidopsis has four PALs: AT2G37040 (PAL1), AT3G53260 (PAL2), AT5G04230 (PAL3) and AT3G10340 (PAL4).	PAL1
SHI_00006289-RA	2.15995	1.55787	0.00157193	Up	AT5G44820	Nucleotide-diphospho-sugar transferase family protein	AT5G44820
SHI_00001144-RA	-2.72092	2.22673	0.00157341	Down	AT1G23090	Encodes AST91 mRNA for sulfate transporter.	SULTR3;3
SHI_00000378-RA	2.68344	4.38398	0.00158756	Up	AT5G42980	encodes a cytosolic thioredoxin that reduces disulfide bridges of target proteins by the reversible formation of a disulfide bridge between two neighboring Cys residues present in the active site. Thioredoxins have been found to regulate a variety of biological reactions in prokaryotic and eukaryotic cells. The mRNA is cell-to-cell mobile.	TRX3
SHI_00028708-RA	2.78658	1.00807	0.00160343	Up	AT5G52220	chromosome transmission fidelity-like protein	AT5G52220
SHI_00029581-RA	-2.56451	2.51729	0.0016137	Down	AT1G06970	member of Putative Na+/H+ antiporter family	CHX14
SHI_00021740-RA	2.53049	2.05901	0.00161592	Up	AT1G08300	no vein-like protein	NVL
SHI_00026281-RA	-8.27507	2.13769	0.00162741	Down	AT2G44450	beta glucosidase 15	BGLU15
SHI_00009229-RA	2.45736	2.16415	0.00166196	Up	AT3G12110	Encodes an actin that is expressed predominantly during reproductive development.	ACT11
SHI_00018584-RA	-2.45638	1.20344	0.00166716	Down	AT5G49190	Encodes a sucrose synthase (SUS2). The activity of the enzyme could not be assayed as proved to be insoluble (PMID 17257168). However, analyses of an sus2 mutant revealed a deficiency in sucrose synthase activity 12 and 15 days after flowering. There are some reports that SUS2 transcript levels are increased in leaves specifically by O(2) deficiency whereas other reports indicate that SUS2 is exp…	SUS2
SHI_00014518-RA	3.08684	0.755277	0.00167377	Up	AT4G25120	Encodes a homolog of the yeast SRS2 (Suppressor of RAD Six-screen mutant 2) helicase. The Arabidopsis SRS2 is a functional 3?- to 5?-helicase. Biochemical studies show that SRS2 disrupts recombinogenic DNA intermediates and facilitates single strand annealing.	SRS2
SHI_00018471-RA	-4.94266	2.15083	0.00167627	Down	AT4G13480	Member of the R2R3 factor gene family.	MYB79
SHI_00006503-RA	-2.26958	8.06213	0.00167973	Down	AT4G29350	Encodes profilin2, a low-molecular weight, actin monomer-binding protein that regulates the organization of actin cytoskeleton. Expressed in vegetative organs. The first intron of PRF2 enhances gene expression. The mRNA is cell-to-cell mobile.	PFN2
SHI_00026176-RA	-2.86995	4.70249	0.00169698	Down	AT3G02040	Encodes a member of the glycerophosphodiester phosphodiesterase (GDPD) family. Has glycerophosphodiester phosphodiesterase activity. Functions in maintaining cellular phosphate homeostasis under phosphate starvation. The mRNA is cell-to-cell mobile.	SRG3
SHI_00011904-RA	2.17832	4.26241	0.00170011	Up	AT3G44716	hypothetical protein	AT3G44716
SHI_00011377-RA	4.69159	1.1376	0.00170474	Up	AT2G43570	chitinase	CHI
SHI_00017890-RA	2.14558	2.64087	0.00170574	Up	AT5G62070	Member of IQ67 (CaM binding) domain containing family.	IQD23
SHI_00018016-RA	3.04278	0.655004	0.0017269	Up	AT2G19500	It encodes a protein whose sequence is similar to cytokinin oxidase/dehydrogenase, which catalyzes the degradation of cytokinins.	CKX2
SHI_00003617-RA	-2.13965	0.945073	0.00173468	Down	AT2G45120	C2H2-like zinc finger protein	ZAT4
SHI_00021050-RA	-2.69193	8.79268	0.00174944	Down	AT1G30910	Molybdenum cofactor sulfurase family protein	AT1G30910
SHI_00009531-RA	-2.29004	1.17577	0.00177605	Down	AT3G63095	Encodes a Protease inhibitor/seed storage/LTP family protein	AT3G63095
SHI_00024831-RA	-3.10276	3.85801	0.00179274	Down	AT2G01890	Encodes a purple acid phosphatase (PAP) belonging to the low molecular weight plant PAP group.	PAP8
SHI_00027258-RA	2.53903	0.842289	0.00181324	Up	AT5G14980	alpha/beta-Hydrolases superfamily protein	MAGL14
SHI_00029066-RA	3.08827	6.75305	0.00183347	Up	AT5G57010	calmodulin-binding family protein	AT5G57010
SHI_00022020-RA	-3.61597	3.48852	0.00183369	Down	AT4G03070	Encodes a possible 2-oxoglutarate-dependent dioxygenase that is involved in glucosinolate biosynthesis. The gene is expressed in all ecotypes examined but the enzymatic activity has not been determined experimentally. In Col, there is one copy of this gene (aka AOP1.1) but Ler contains two copies, AOP1.1 and a tightly linked AOP1.2.	AOP1
SHI_00004932-RA	3.08105	6.97467	0.0018653	Up	AT1G02920	Encodes glutathione transferase belonging to the phi class of GSTs. Naming convention according to Wagner et al. (2002).	GSTF7
SHI_00001217-RA	-4.84856	2.30993	0.00191183	Down	AT1G68740	Encodes PHO1	PHO1;H1
SHI_00005632-RA	2.70512	0.993495	0.00192234	Up	AT4G28490	Member of Receptor kinase-like protein family. Controls the separation step of floral organ abscission. The mRNA is cell-to-cell mobile.	HAE
SHI_00007765-RA	-2.05129	6.27437	0.00192331	Down	AT1G14150	Encodes a subunit of the NAD(P)H dehydrogenase complex located in the chloroplast thylakoid lumen.	PNSL2
SHI_00012925-RA	2.14498	2.14517	0.0019257	Up	AT1G22570	Major facilitator superfamily protein	AT1G22570
SHI_00022140-RA	2.94855	0.974034	0.00193999	Up	AT4G28310	microtubule-associated protein	AT4G28310
SHI_00030513-RA	3.03167	0.633927	0.00194697	Up	AT4G21215	transmembrane protein	AT4G21215
SHI_00003848-RA	3.00283	0.759473	0.00194703	Up	AT4G35300	tonoplast monosaccharide transporter2	TMT2
SHI_00008122-RA	-2.28324	3.17237	0.00195494	Down	AT1G74170	receptor like protein 13	RLP13
SHI_00020674-RA	2.22231	3.0945	0.00195994	Up	AT4G26690	Glycerophosphoryl diester phosphodiesterase-like protein involved in cell wall cellulose accumulation and pectin linking. Impacts root hair, trichome and epidermal cell development.	SHV3
SHI_00025339-RA	2.08729	5.25554	0.00196761	Up	AT5G24150	squalene monooxygenase gene homolog	SQP1
SHI_00028654-RA	-3.28607	4.98833	0.00199851	Down	AT2G04430	nudix hydrolase homolog 5	NUDT5
SHI_00009373-RA	2.58579	1.00992	0.00201362	Up	AT4G04940	transducin family protein / WD-40 repeat family protein	AT4G04940
SHI_00004957-RA	2.04291	2.09119	0.00201368	Up	AT3G55190	alpha/beta-Hydrolases superfamily protein	MAGL11
SHI_00002602-RA	2.40376	2.13629	0.00204885	Up	AT1G80160	Vicinal oxygen chelate (VOC) superfamily member.	GLYI7
SHI_00019216-RA	2.50714	0.555407	0.00207603	Up	AT5G25900	Encodes a member of the CYP701A cytochrome p450 family that is involved in later steps of the gibberellin biosynthetic pathway.	GA3
SHI_00030528-RA	3.11356	4.61683	0.00209194	Up	AT4G28110	Member of the R2R3 factor gene family. Expression is induced in response to desiccation, ABA and salt treatment. Overexpression of Myb41 results in abnormal cuticle development and decreased cell expansion.	MYB41
SHI_00021925-RA	-2.1394	11.4593	0.00211796	Down	AT4G18240	Encodes a starch synthase. In Arabidopsis leaves, the catalytic C-terminal region of STARCH SYNTHASE 4 promotes starch granule initiation while its non-catalytic N-terminal region determines starch granules morphology.	SS4
SHI_00011043-RA	-2.06379	3.18041	0.00215216	Down	AT3G51600	Predicted to encode a PR (pathogenesis-related) protein. Belongs to the lipid transfer protein (PR-14) family with the following members: At2g38540/LTP1, At2g38530/LTP2, At5g59320/LTP3, At5g59310/LTP4, At3g51600/LTP5, At3g08770/LTP6, At2g15050/LTP7, At2g18370/LTP8, At2g15325/LTP9, At5g01870/LTP10, At4g33355/LTP11, At3g51590/LTP12, At5g44265/LTP13, At5g62065/LTP14, At4g08530/LTP15.	LTP5
SHI_00021301-RA	-2.75921	2.10969	0.00216407	Down	AT1G65920	Regulator of chromosome condensation (RCC1) family with FYVE zinc finger domain-containing protein	AT1G65920
SHI_00005529-RA	-2.6469	5.63112	0.00218102	Down	AT2G27940	RING/U-box superfamily protein	ATL57
SHI_00021662-RA	5.19035	7.0154	0.00218267	Up	AT1G56160	Encodes a member of the R2R3 transcription factor gene family that is involved in mediating induced systemic resistance. Genetic analysis of loss of function mutants and overexpressor lines indicates MYB72 is necessary but not sufficient for ISR.Interacts in vivo with EIL3.	MYB72
SHI_00002425-RA	-2.1636	3.2809	0.00218667	Down	AT1G30560	Encodes a member of the phosphate starvation-induced glycerol-3-phosphate permease gene family: AT3G47420(G3Pp1), AT4G25220(G3Pp2), AT1G30560(G3Pp3), AT4G17550(G3Pp4) and AT2G13100(G3Pp5).	G3PP3
SHI_00003968-RA	-2.51589	3.32057	0.00219029	Down	AT4G19680	encodes an iron transporter whose expression is induced by iron and zinc deficiency. Gene is specifically expressed in the external cell layers of the root subapical zone.	IRT2
SHI_00024936-RA	-2.18249	8.78562	0.00222355	Down	AT1G18750	Encodes a member of the MIKC (MADS box, Keratin binding domain, and C terminal domain containing )family of transcriptional regulators. AGL65 is expressed in pollen.It forms heterodimers with other MICK family members (AGL104). Involved in late stages of pollen development and pollen tube growth.	AGL65
SHI_00000689-RA	2.82434	5.99587	0.00222367	Up	AT4G11070	member of WRKY Transcription Factor	WRKY41
SHI_00000807-RA	-2.64561	2.77667	0.00225418	Down	AT4G11780	GAR2-like protein	TRM10
SHI_00017009-RA	-2.51417	11.2745	0.00228358	Down	AT1G52230	Phosphorylation of this protein is dependent on calcium. The mRNA is cell-to-cell mobile.	PSAH2
SHI_00008202-RA	-2.65341	10.7081	0.00230403	Down	AT3G59400	GUN, genomes uncoupled, is necessary for coupling the expression of some nuclear genes to the functional state of the chloroplast. Binds to the magnesium chelatase complex and promotes formation of the substrate,a tetrapyrrole signaling molecule. Porphyrin-binding protein that enhances the activity of Mg-chelatase. Although required for chlorophyll accumulation under normal growth conditions, GUN…	GUN4
SHI_00004737-RA	4.04339	0.91749	0.00230908	Up	AT2G22140	Forms a complex with MUS81 that functions as endonuclease in DNA recombination and repair processes.	EME1B
SHI_00028062-RA	2.74411	2.03888	0.00232313	Up	AT5G66580	hypothetical protein	AT5G66580
SHI_00008951-RA	2.71786	1.0604	0.00232972	Up	AT1G76820	eukaryotic translation initiation factor 2 (eIF-2) family protein	AT1G76820
SHI_00018742-RA	2.11167	0.557924	0.00233342	Up	AT4G14940	atao1 gene of Arabidopsis thaliana encodes an extracellular copper amine oxidase expressed during early stages of vascular tissue development.	AO1
SHI_00023963-RA	2.28505	1.28094	0.00234209	Up	AT4G05190	ATK5 encodes a kinesin protein involved in microtubule spindle morphogenesis. It acts as a minus-end directed motor as well as a plus-end tracking protein (+TIP). Localizes to mitotic spindle midzones and regions rich in growing plus-ends within phragmoplasts.	ATK5
SHI_00001804-RA	2.32602	2.07728	0.0023728	Up	AT2G34050	ATP synthase F1 complex assembly factor	AT2G34050
SHI_00022756-RA	5.54567	0.482011	0.00239438	Up	AT5G43410	Encodes a member of the ERF (ethylene response factor) subfamily B-3 of ERF/AP2 transcription factor family. The protein contains one AP2 domain. There are 18 members in this subfamily including ATERF-1, ATERF-2, AND ATERF-5. Expression of ERF96 is induced by pathogens, JA and ethylene and over expression leads to increased resistance to resistance to necrotrophic pathogens. It is a nuclear local…	ERF96
SHI_00005960-RA	2.87463	3.40047	0.00241327	Up	AT2G47160	Boron transporter. Protein accumulates in shoots and roots under conditions of boron deficiency and is degraded within several hours of restoring boron supply. Localized to the plasma membrane under B limitation, and to the cytoplasm after B application before degradation. Protein is transferred via the endosomes to the vacuole for degradation. Localized to the inner plasma membrane domain in the…	BOR1
SHI_00016396-RA	-2.79116	6.87925	0.0024585	Down	AT3G21460	Encodes a member of the CC-type glutaredoxin (ROXY) family that has been shown to interact with the transcription factor TGA2 and suppress ORA59 promoter activity.	ROXY3
SHI_00029475-RA	-2.72224	2.03858	0.00249263	Down	AT1G18630	encodes a glycine-rich RNA binding protein.	RBGA1
SHI_00001633-RA	2.18969	7.23812	0.00253505	Up	AT5G25610	responsive to dehydration 22 (RD22) mediated by ABA	RD22
SHI_00010103-RA	2.0816	1.34805	0.0026416	Up	AT5G16850	Encodes the catalytic subunit of telomerase reverse transcriptase. Involved in telomere homeostasis. Homozygous double mutants with ATR show gross morphological defects over a period of generations. TERT shows Class II telomerase activity in vitro, indicating that it can initiate de novo telomerase synthesis on non-telomeric DNA, often using a preferred position within the telomerase-bound RNA. L…	TERT
SHI_00027104-RA	-3.2448	3.93432	0.00277983	Down	AT1G53160	Encodes a member of the SPL (squamosa-promoter binding protein-like)gene family, a novel gene family encoding DNA binding proteins and putative transcription factors. Contains the SBP-box, which encodes the SBP-domain, required and sufficient for interaction with DNA. It is involved in regulation of flowering and vegetative phase change. Its temporal expression is regulated by the microRNA miR156…	SPL4
SHI_00011390-RA	-3.03986	1.60366	0.00280683	Down	AT3G44250	putative cytochrome P450	CYP71B38
SHI_00014124-RA	2.34006	0.714521	0.00282365	Up	AT4G23340	2-oxoglutarate (2OG) and Fe(II)-dependent oxygenase superfamily protein	AT4G23340
SHI_00000511-RA	3.20102	1.71081	0.00283236	Up	AT2G05320	beta-1,2-N-acetylglucosaminyltransferase II	GNT-II
SHI_00004155-RA	-2.31079	2.49971	0.00289725	Down	AT3G15510	Note of caution: not to be confused with another protein (AtNAC6 locus AT5G39610) which on occasion has also been referred to as AtNAC2.	NAC2
SHI_00013309-RA	-2.08519	7.25686	0.00297168	Down	AT1G75820	Putative receptor kinase with an extracellular leucine-rich domain. Controls shoot and floral meristem size, and contributes to establish and maintain floral meristem identity. Negatively regulated by KAPP (kinase-associated protein phosphatase). CLV3 peptide binds directly CLV1 ectodomain.	CLV1
SHI_00021767-RA	2.65116	4.57739	0.0029959	Up	AT1G22170	Phosphoglycerate mutase family protein	AT1G22170
SHI_00017193-RA	-2.00587	3.83262	0.00301654	Down	AT5G51750	subtilase 1.3	SBT1.3
SHI_00007300-RA	-2.26133	7.54376	0.00310299	Down	AT2G34620	Mitochondrial transcription termination factor family member.	MTERF10
SHI_00027123-RA	-2.36	8.70667	0.00311404	Down	AT2G20570	Encodes GLK1, Golden2-like 1, one of a pair of partially redundant nuclear transcription factors that regulate chloroplast development in a cell-autonomous manner. GLK2, Golden2-like 2, is encoded by At5g44190. GLK1 and GLK2 regulate the expression of the photosynthetic apparatus.	GPRI1
SHI_00027286-RA	3.17731	3.31134	0.00312297	Up	AT4G28680	Encodes a stress-induced tyrosine decarboxylase (TyrDC). Recombinant (His)6-TyrDC expressed in E. coli catalyzes the conversion of L-tyrosine to tyramine. Recombinant TyrDC forms tetramers.	TYRDC
SHI_00016703-RA	2.34509	3.88608	0.00313566	Up	AT5G39670	Calmodulin like protein involved in negative regulation of pattern triggered immunity.	CML46
SHI_00014738-RA	2.53862	4.43332	0.00321117	Up	AT1G56040	HEAT/U-box protein	AT1G56040
SHI_00005611-RA	-2.18669	0.767963	0.00322036	Down	AT2G33790	pollen Ole e 1 allergen protein containing 14.6% proline residues, similar to arabinogalactan protein (Daucus carota) GI:11322245, SP:Q03211 Pistil-specific extensin-like protein precursor (PELP) {Nicotiana tabacum}	AGP30
SHI_00008572-RA	6.78314	3.87614	0.003265	Up	AT4G11650	osmotin-like protein	OSM34
SHI_00004902-RA	2.22288	1.94369	0.00328992	Up	AT5G13210	Uncharacterized conserved protein UCP015417, vWA	AT5G13210
SHI_00002836-RA	-2.33364	2.27159	0.00329729	Down	AT5G03140	Concanavalin A-like lectin protein kinase family protein	LECRK-VIII.2
SHI_00012481-RA	2.22461	0.861689	0.00331353	Up	AT1G67970	member of Heat Stress Transcription Factor (Hsf) family	HSFA8
SHI_00006264-RA	2.79241	0.58978	0.00334554	Up	AT4G19350	embryo defective 3006	EMB3006
SHI_00014452-RA	-2.18749	1.96764	0.00336305	Down	AT3G62630	stress response NST1-like protein (DUF1645)	AT3G62630
SHI_00004716-RA	2.1041	2.10453	0.00338512	Up	AT5G66350	A member of SHI gene family. Arabidopsis thaliana has ten members that encode proteins with a RING finger-like zinc finger motif. Despite being highly divergent in sequence, many of the SHI-related genes are partially redundant in function and synergistically promote gynoecium, stamen and leaf development in Arabidopsis. Shi mutant is dominant, has dwarf phenotype. Loss of function mutations have…	SHI
SHI_00018616-RA	2.28037	0.453962	0.00338818	Up	AT2G47650	encodes a protein similar to UDP-glucuronic acid decarboxylase. UDP-glucuronic acid decarboxylase produces UDP-xylose, which is a substrate for many cell wall carbohydrates including hemicellulose and pectin. UDP-xylose is also known to feedback regulate several cell wall biosynthetic enzymes.	UXS4
SHI_00004791-RA	-2.435	1.81209	0.00340832	Down	AT3G26170	putative cytochrome P450	CYP71B19
SHI_00011134-RA	-2.81535	1.05104	0.00341414	Down	AT2G16770	Basic-region leucine zipper (bZIP23) transcription factor involved in the adaptation to zinc deficiency. Binds ZDRE motifs.	BZIP23
SHI_00001239-RA	2.10372	3.16011	0.00344307	Up	AT3G25780	Encodes allene oxide cyclase, one of the enzymes involved in jasmonic acid biosynthesis. One of four genes in Arabidopsis that encode this enzyme. mRNA expression is upregulated in senescing leaves. Note: Nomenclature for Arabidopsis allene oxide cyclase 3 (AOC3, AT3G25780) gene is based on Stenzel et al. 2003 Plant Molecular Biology 51:895-911. AOC3 (AT3G25780) is also referred to as AOC2 in He …	AOC3
SHI_00001726-RA	3.83953	3.6427	0.00346866	Up	AT1G05680	Encodes a UDP-glucosyltransferase, UGT74E2, that acts on IBA (indole-3-butyric acid) and affects auxin homeostasis. The transcript and protein levels of this enzyme are strongly induced by H2O2 and may allow integration of ROS (reactive oxygen species) and auxin signaling. This enzyme can also transfer glycosyl groups to several compounds related to the explosive TNT when this synthetic compound …	UGT74E2
SHI_00027082-RA	2.2814	0.511999	0.00361922	Up	AT1G52270	hypothetical protein	AT1G52270
SHI_00028297-RA	2.42228	1.53367	0.00364547	Up	AT5G63790	Encodes a member of the NAC family of transcription factors. ANAC102 appears to have a role in mediating response to low oxygen stress (hypoxia) in germinating seedlings. Its expression can be induced by beta-cyclocitral, an oxidized by-product of beta-carotene generated in the chloroplasts, mediates a protective retrograde response that lowers the levels of toxic peroxides and carbonyls, limitin…	NAC102
SHI_00030089-RA	-2.36784	0.586867	0.00364675	Down	AT3G56230	BTB/POZ domain-containing protein	AT3G56230
SHI_00020163-RA	2.32026	6.68347	0.00366017	Up	AT4G27280	EF-hand Ca2 + -binding protein, which is a Ca2+-dependent transducer of auxin-regulated gene expression and interacts with ICR1.	CMI1
SHI_00000307-RA	-2.1083	2.3332	0.00372902	Down	AT2G01150	Encodes a RING-H2 finger protein that is expressed in vascular tissue, root tips, embryos and pistils.	RHA2B
SHI_00003929-RA	2.57049	2.8527	0.00379282	Up	AT2G22570	encodes a nicotinamidase that converts nicotinamide into nicotinic acid. As such the encoded enzyme is involved in the pyridine nucleotide salvage pathway which may be connected to the de novo NAD biosynthesis through the ABA signaling pathway.	NIC1
SHI_00002007-RA	2.30481	0.58099	0.00380596	Up	AT3G49160	Expression of the gene is downregulated in the presence of paraquat, an inducer of photoxidative stress.	AT3G49160
SHI_00010876-RA	-2.97811	1.3065	0.003871	Down	AT3G11930	Adenine nucleotide alpha hydrolases-like superfamily protein	AT3G11930
SHI_00014745-RA	2.04978	2.02708	0.00388074	Up	AT5G42020	Luminal binding protein (BiP2) involved in polar nuclei fusion during proliferation of endosperm nuclei.	BIP2
SHI_00001188-RA	2.41296	1.17812	0.00388594	Up	AT1G13630	Tetratricopeptide repeat (TPR)-like superfamily protein	AT1G13630
SHI_00020533-RA	3.22111	1.90987	0.00390998	Up	AT3G23250	Member of the R2R3 factor gene family.	MYB15
SHI_00003703-RA	2.17919	1.30189	0.00394103	Up	AT5G50810	Encodes a small zinc finger-like protein that is a component of the mitochondrial protein import apparatus.	TIM8
SHI_00013355-RA	2.44	2.1904	0.0040268	Up	AT1G20010	beta tubulin	TUB5
SHI_00013676-RA	3.50822	7.278	0.00407566	Up	AT2G35930	Encodes a cytoplasmically localized U-box domain containing E3 ubiquitin ligase that is involved in the response to water stress and acts as a negative regulator of PAMP-triggered immunity.	PUB23
SHI_00000124-RA	-2.0125	2.89707	0.00408733	Down	AT3G25620	ABC-2 type transporter family protein	ABCG21
SHI_00014579-RA	-2.68596	9.75796	0.004204	Down	AT1G45474	Encodes a component of the light harvesting complex of photosystem I.	LHCA5
SHI_00026786-RA	2.09834	6.58317	0.00421508	Up	AT1G34200	Glyceraldehyde-3-phosphate dehydrogenase-like family protein	AT1G34200
SHI_00011767-RA	-2.04513	6.46985	0.00425203	Down	AT2G16050	Cysteine/Histidine-rich C1 domain family protein	AT2G16050
SHI_00016237-RA	2.07958	5.44172	0.00430801	Up	AT3G04000	ChlADR is an aldehyde reductase that catalyzes the reduction of the aldehyde carbonyl groups on saturated and alpha,beta-unsaturated aldehydes with more than 5 carbons in vitro. The N-terminal region of this protein directs GFP to the chloroplast where where ChlADR likely helps to maintain the photosynthetic process by detoxifying reactive carbonyls formed during lipid peroxidation. In addition, …	AT3G04000
SHI_00025082-RA	2.55141	0.960329	0.00431736	Up	AT3G11720	Polyketide cyclase/dehydrase and lipid transport superfamily protein	AT3G11720
SHI_00007175-RA	2.08322	2.68424	0.00431975	Up	AT1G49750	Leucine-rich repeat (LRR) family protein	AT1G49750
SHI_00009054-RA	-2.97784	6.85578	0.0044811	Down	AT1G21500	hypothetical protein	AT1G21500
SHI_00027831-RA	2.17153	0.931995	0.00450317	Up	AT3G17950	transmembrane protein	AT3G17950
SHI_00002667-RA	2.64455	0.619346	0.00458246	Up	AT2G47460	MYB12 belongs to subgroup 7 of the R2R3-MYB family. It strongly activates the promoters of chalcone synthase (CHS), flavanone 3-hydroxylase (F3H), flavonol synthase (FLS) and - to a lesser extent - chalcone flavanone isomerase (CHI), but cannot activate the promoters of flavonoid-3'hydroxylase (F3'H) and dihydroflavonol 4-reductase (DF). The activation requires a functional MYB recognition elemen…	MYB12
SHI_00001540-RA	5.62094	3.76512	0.00461659	Up	AT1G34050	Ankyrin repeat family protein	AT1G34050
SHI_00020733-RA	2.90744	2.52848	0.00463565	Up	AT4G27260	encodes an IAA-amido synthase that conjugates Asp and other amino acids to auxin in vitro. Lines carrying insertions in this gene are hypersensitive to auxin. It is involved in camalexin biosynthesis via conjugating indole-3-carboxylic acid (ICA) and cysteine (Cys). The mRNA is cell-to-cell mobile.	WES1
SHI_00025295-RA	-2.28231	5.45492	0.00473334	Down	AT3G61870	plant/protein	AT3G61870
SHI_00013902-RA	2.34082	0.964307	0.00477528	Up	AT4G12320	member of CYP706A	CYP706A6
SHI_00029042-RA	-3.1635	8.92902	0.00480124	Down	AT5G20630	Encodes a germin-like protein. Its transcripts are more abundant in RNA from leaves collected in the evening, suggesting some kind of circadian regulation.	GER3
SHI_00030100-RA	-3.17327	0.498163	0.00481136	Down	AT5G56320	member of Alpha-Expansin Gene Family. Naming convention from the Expansin Working Group (Kende et al, 2004. Plant Mol Bio)	EXPA14
SHI_00002799-RA	2.19036	1.53749	0.00481136	Up	AT1G67320	DNA primase, large subunit family	EMB2813
SHI_00023870-RA	7.10787	2.29304	0.0048143	Up	AT4G08630	fas-binding factor-like protein	AT4G08630
SHI_00012595-RA	-2.25866	7.66042	0.00483299	Down	AT4G15560	Encodes a protein with 1-deoxyxylulose 5-phosphate synthase activity involved in the MEP pathway. It is essential for chloroplast development in Arabidopsis	CLA1
SHI_00030043-RA	-2.08676	7.2063	0.00493652	Down	AT1G49975	photosystem I reaction center subunit N	AT1G49975
SHI_00028690-RA	-2.33762	0.561736	0.00497266	Down	AT5G51930	Glucose-methanol-choline (GMC) oxidoreductase family protein	AT5G51930
SHI_00023286-RA	2.43969	4.15726	0.00504353	Up	AT3G03280	hypothetical protein	AT3G03280
SHI_00000915-RA	-2.44342	3.40395	0.00507596	Down	AT4G10440	S-adenosyl-L-methionine-dependent methyltransferases superfamily protein	AT4G10440
SHI_00015185-RA	4.2597	4.92945	0.00520745	Up	AT1G25550	myb-like transcription factor family protein	HHO3
SHI_00006717-RA	-2.19821	3.23384	0.00526518	Down	AT1G58400	Disease resistance protein (CC-NBS-LRR class) family	AT1G58400
SHI_00027670-RA	2.74968	0.567816	0.00537808	Up	AT5G18270	NAC domain containing protein 87	ANAC087
SHI_00000469-RA	-2.36852	4.39042	0.00544448	Down	AT3G50560	NAD(P)-binding Rossmann-fold superfamily protein	AT3G50560
SHI_00008820-RA	2.89669	1.41034	0.00545865	Up	AT1G10588	Encodes a Gibberellin-regulated GASA/GAST/Snakin family protein	AT1G10588
SHI_00028324-RA	2.0501	2.48366	0.00551084	Up	AT2G19440	Homolog of ZET, an atypical &#946	ZETH
SHI_00005336-RA	2.90142	4.52467	0.00551706	Up	AT3G19580	Encodes zinc finger protein. mRNA levels are upregulated in response to ABA, high salt, and mild desiccation. The protein is localized to the nucleus and acts as a transcriptional repressor.	ZF2
SHI_00018595-RA	3.95889	5.89127	0.00554174	Up	AT5G24860	encodes a small protein of 12.6 kDa that regulates flowering and is involved in gibberellin signalling pathway. It is expressed in apical meristems immediately after the photoperiodic induction of flowering. Genetic interactions with flowering time and floral organ identity genes suggest that this gene may be involved in modulating the competence to flower. There are two other genes similar to FP…	FPF1
SHI_00005166-RA	-2.11352	4.57481	0.00556531	Down	AT4G23410	TET5 encodes a member of the TETRASPANIN gene family that is expressed in the embryo and vascular system and is involved in organ growth redundantly with TET6.	TET5
SHI_00014610-RA	3.29499	1.36233	0.00563271	Up	AT5G13250	RING finger protein	AT5G13250
SHI_00004667-RA	2.82772	3.58753	0.0056617	Up	AT4G37640	Encodes a calmodulin-regulated Ca(2+)-pump located in the endoplasmic reticulum. Belongs to plant 2B ATPase's with an N-terminal autoinhibitor.	ACA2
SHI_00004186-RA	3.55165	2.64352	0.00568207	Up	AT1G61480	S-locus lectin protein kinase family protein	AT1G61480
SHI_00003798-RA	3.16584	3.93902	0.00572607	Up	AT4G36070	member of Calcium Dependent Protein Kinase	CPK18
SHI_00026687-RA	-3.04002	4.54515	0.00575974	Down	AT1G73630	EF hand calcium-binding protein family	AT1G73630
SHI_00023798-RA	-8.35597	2.19646	0.00604546	Down	AT4G13300	Catalyzes the conversion of farnesyl diphosphate to (Z)-gamma-bisabolene and the additional minor products E-nerolidol and alpha-bisabolol. Expressed in cortex and sub-epidermal layers of roots, leaf hydathodes and flower stigmata. Induced by wounding.	TPS13
SHI_00023500-RA	2.1643	1.15838	0.00604897	Up	AT1G14840	Encodes a microtubule associated protein (MAP70-4). Expressed in all tissues.	MAP70-4
SHI_00002023-RA	2.66143	1.07625	0.00617898	Up	AT5G52920	encodes a dominant chloroplast pyruvate kinase beta subunit. Important for seed oil biosynthesis. Ubiquitously expressed, with significantly increased expression in maturing seeds. The mutant plant has wrinkled seeds, with a 50-70% reduction in seed fatty acid content. The mRNA is cell-to-cell mobile.	PKP-BETA1
SHI_00010325-RA	3.00084	1.63609	0.00629882	Up	AT5G02230	Haloacid dehalogenase-like hydrolase (HAD) superfamily protein	AT5G02230
SHI_00016738-RA	-2.00869	3.12917	0.00634747	Down	AT5G15100	Encodes an auxin transporter with a strong expression in a male gametophyte. Mutant studies reveal a role for auxin transport in regulating pollen development and function. It acts together with PIN5.	PIN8
SHI_00030357-RA	2.43913	0.964389	0.0064234	Up	AT1G65340	member of CYP96A	CYP96A3
SHI_00006336-RA	2.25849	0.633137	0.00644244	Up	AT4G31710	member of Putative ligand-gated ion channel subunit family	GLR2.4
SHI_00018249-RA	2.10427	1.05132	0.00646319	Up	AT4G25960	P-glycoprotein 2	ABCB2
SHI_00019372-RA	-2.30426	11.9174	0.00647809	Down	AT1G15820	Lhcb6 protein (Lhcb6), light harvesting complex of photosystem II.	LHCB6
SHI_00002459-RA	2.27592	0.618123	0.00647846	Up	AT5G51600	Mutant has defective roots. Essential for giant cell ontogenesis. Role in organizing the mitotic microtubule array during both early and late mitosis in all plant organs.	PLE
SHI_00012091-RA	2.40764	8.14699	0.00647989	Up	AT1G01720	Belongs to a large family of putative transcriptional activators with NAC domain. Transcript level increases in response to wounding and abscisic acid. ATAF1 attentuates ABA signaling and sythesis. Mutants are hyposensitive to ABA. The mRNA is cell-to-cell mobile.	ATAF1
SHI_00000251-RA	2.29366	2.48908	0.00666711	Up	AT4G24610	pesticidal crystal cry8Ba protein	AT4G24610
SHI_00015506-RA	3.57899	4.0411	0.00675784	Up	AT5G44020	HAD superfamily, subfamily IIIB acid phosphatase	AT5G44020
SHI_00009707-RA	-2.20853	1.23536	0.00681343	Down	AT1G76370	Protein kinase superfamily protein	PBL22
SHI_00015991-RA	-3.33426	4.04396	0.00718151	Down	AT1G15530	Concanavalin A-like lectin protein kinase family protein	LECRK-S.1
SHI_00010939-RA	2.05267	1.57121	0.00722657	Up	AT3G09070	Encodes a polarly localised membrane-associated protein that regulates phloem differentiation entry.	OPS
SHI_00023322-RA	2.4551	0.486339	0.00729995	Up	AT3G07070	Protein kinase superfamily protein	PBL26
SHI_00001355-RA	2.65046	0.686973	0.00737048	Up	AT2G39430	Disease resistance-responsive (dirigent-like protein) family protein	AT2G39430
SHI_00021004-RA	3.43171	3.99351	0.00738882	Up	AT1G06475	transmembrane protein	AT1G06475
SHI_00025644-RA	2.29387	3.15866	0.00739397	Up	AT5G08590	Encodes a member of SNF1-related protein kinases (SnRK2) whose activity is activated by ionic (salt) and non-ionic (mannitol) osmotic stress. Similar to the calcium/calmodulin-dependent protein kinase subfamily and the SNF1 kinase subfamily.	SNRK2.1
SHI_00006917-RA	2.64691	1.0858	0.00739397	Up	AT2G43000	Encodes a NAC transcription factor induced by hydrogen peroxide (H2O2). Involved in senescence. Over expression of the gene strongly delays senescence and enhances tolerance to various abiotic stresses.	NAC042
SHI_00015314-RA	-2.13803	3.99945	0.00739436	Down	AT5G11160	adenine phosphoribosyltransferase 5	APT5
SHI_00024910-RA	2.57196	1.19217	0.00740459	Up	AT5G61130	Encodes a plasmodesmatal localized protein with callose binding activity. The function of PDCB1 is unknown but overexpression leads to the hyperaccumulation of callose.	PDCB1
SHI_00023832-RA	-2.81821	1.80069	0.00740845	Down	AT4G20790	Leucine-rich repeat protein kinase family protein	AT4G20790
SHI_00014400-RA	-3.50427	5.07795	0.00751307	Down	AT2G47870	Encodes a member of the CC-type glutaredoxin (ROXY) family that has been shown to interact with the transcription factor TGA2 and suppress ORA59 promoter activity.	ROXY5
SHI_00005418-RA	3.13204	4.0837	0.00760231	Up	AT2G13810	ALD1 is a L-lysine alpha-aminotransferase. It is part of the pipecolic acid biosynthetic pathway, where it catalyzes the biochemical conversion of lysine to epsilon-amino-alpha-ketocaproic acid (KAC) which is subject to subsequent transamination, cyclization and isomerization to form 2,3-dehydropipecolic acid.	ALD1
SHI_00008894-RA	6.29222	7.35603	0.00764427	Up	AT2G14580	pathogenesis related protein, encodes a basic PR1-like protein. Expresses in flowers, roots, and not in leaves and responses to ethylene and methyl jasmonate. Salicylic acid represses gene expression.	PRB1
SHI_00000327-RA	2.46787	3.13026	0.00774012	Up	AT5G64810	member of WRKY Transcription Factor	WRKY51
SHI_00011879-RA	2.48891	0.799513	0.00779835	Up	AT2G28150	DUF966 domain containing protein, expressed during embryogenesis.	SOK3
SHI_00001187-RA	2.58787	2.97694	0.00787395	Up	AT1G13635	DNA glycosylase superfamily protein	AT1G13635
SHI_00012054-RA	2.83297	1.31097	0.00805818	Up	AT4G15755	Calcium-dependent lipid-binding (CaLB domain) family protein	AT4G15755
SHI_00012988-RA	-3.39287	2.07582	0.00808032	Down	AT4G10120	Encodes a protein with putative sucrose-phosphate synthase activity.	SPS4F
SHI_00015644-RA	4.32359	3.39601	0.0080889	Up	AT1G72540	Protein kinase superfamily protein	PBL33
SHI_00017587-RA	2.04586	3.76054	0.00820004	Up	AT3G56130	biotin/lipoyl attachment domain-containing protein	BLP3
SHI_00001993-RA	2.75916	4.40903	0.00820301	Up	AT5G24200	alpha/beta-Hydrolases superfamily protein	AT5G24200
SHI_00029625-RA	2.18554	0.752939	0.00820363	Up	AT5G20970	HSP20-like chaperones superfamily protein	AT5G20970
SHI_00018937-RA	2.18911	3.23945	0.00826826	Up	AT5G58660	2-oxoglutarate (2OG) and Fe(II)-dependent oxygenase superfamily protein	AT5G58660
SHI_00023780-RA	-2.52463	5.70833	0.0082824	Down	AT5G35810	Ankyrin repeat family protein	AT5G35810
SHI_00022002-RA	-2.48801	11.6607	0.00832067	Down	AT1G30380	Encodes subunit K of photosystem I reaction center. The mRNA is cell-to-cell mobile.	PSAK
SHI_00021399-RA	2.59115	1.36182	0.00834321	Up	AT2G44290	Bifunctional inhibitor/lipid-transfer protein/seed storage 2S albumin superfamily protein	LTPG13
SHI_00009587-RA	3.74739	4.99918	0.0083554	Up	AT3G51895	Encodes a chloroplast-localized sulfate transporter.	SULTR3;1
SHI_00004919-RA	-2.68987	4.63678	0.00842903	Down	AT3G62950	Encodes a member of the CC-type glutaredoxin (ROXY) family that has been shown to interact with the transcription factor TGA2 and suppress ORA59 promoter activity.	GRXC11
SHI_00008504-RA	-2.58481	1.48166	0.00849543	Down	AT2G17260	Encodes a glutamate receptor. Involved in calcium-programmed stomatal closure.	GLR2
SHI_00007238-RA	-2.13767	11.9894	0.00854435	Down	AT1G55670	Encodes subunit G of photosystem I, an 11-kDa membrane protein that plays an important role in electron transport between plastocyanin and PSI and is involved in the stability of the PSI complex. PSI-G subunit is bound to PSI-B and is in contact with Lhca1. The protein inserts into thylakoids by a direct or "spontaneous" pathway that does not involve the activities of any known chloroplast protei…	PSAG
SHI_00026913-RA	3.64477	3.9976	0.00854822	Up	AT1G06680	Encodes a 23 kD extrinsic protein that is part of photosystem II and participates in the regulation of oxygen evolution. Phosphorylation of this protein is dependent on calcium. In plsp1-1 mutant plastids, the nonmature form of the protein localizes in the stroma. The mRNA is cell-to-cell mobile.	PSBP-1
SHI_00018653-RA	2.56786	1.19359	0.00862009	Up	AT4G15620	Uncharacterized protein family (UPF0497)	CASPL1E2
SHI_00016487-RA	-4.26979	3.36894	0.00865473	Down	AT5G07200	encodes a gibberellin 20-oxidase.	GA20OX3
SHI_00010683-RA	2.44587	1.51257	0.00877225	Up	AT1G48600	Encodes a phosphoethanolamine N-methyltransferase that catalyses the last two methylation steps of the three sequential methylations of phosphoethanolamine (PEA) that are required for the synthesis of phosphocholine (PCho) in plants.	PMEAMT
SHI_00000825-RA	-2.31468	8.36214	0.00888354	Down	AT4G11960	Encodes PGRL1B, a transmembrane protein present in thylakoids. PGRL1B has a highly homologous isoform PGRL1A encoded by At4g22890. Plants lacking PGRL1 show perturbation of cyclic electron flow, similar to PGR5-deficient plants. PGRL1 and PGR5 interact physically and associate with PSI (photosystem I).	PGRL1B
SHI_00015436-RA	-3.77238	6.61098	0.00888968	Down	AT3G16140	Encodes subunit H of photosystem I reaction center subunit VI.	PSAH-1
SHI_00020420-RA	2.42203	1.13919	0.00894944	Up	AT3G61990	Encodes a protein methyltransferase. Involved in the methylation of plant transmembrane proteins.	OMTF3
SHI_00000638-RA	3.14465	5.58174	0.00897934	Up	AT2G15480	UDP-glucosyl transferase 73B5	UGT73B5
SHI_00015096-RA	2.01005	3.61747	0.00899442	Up	AT1G69310	Encodes WRKY57, a member of the WRKY Transcription Factor. Activation of WRKY57 confers drought tolerance.	WRKY57
SHI_00022044-RA	2.93518	5.80924	0.00903605	Up	AT4G14130	xyloglucan endotransglycosylase-related protein (XTR7)	XTH15
SHI_00027522-RA	-2.41234	1.01278	0.00904735	Down	AT4G34520	Encodes KCS18, a member of the 3-ketoacyl-CoA synthase family involved in the biosynthesis of VLCFA (very long chain fatty acids).	KCS18
SHI_00029160-RA	2.65218	1.68822	0.0090853	Up	AT4G30250	P-loop containing nucleoside triphosphate hydrolases superfamily protein	AT4G30250
SHI_00003779-RA	3.14709	0.393471	0.00920361	Up	AT1G67080	Encodes a protein involved in the photoprotection of PSII. An aba4-1 mutant completely lacks neoxanthin,a component of the chromophore of the peripheral antenna system in PSII. ABA4 is required for neoxanthin biosynthesis, an intermediary step in abscisic acid biosynthesis, but no catalytic activity has been detected for the ABA4 protein.	ABA
SHI_00007982-RA	4.41895	5.84932	0.00932733	Up	AT2G25700	E3 ubiquitin ligase SCF complex subunit SKP1/ASK1 (At3), putative, E3 ubiquitin ligase	SK3
SHI_00002039-RA	-3.17319	1.33818	0.00935649	Down	AT1G23110	fold protein	AT1G23110
SHI_00027421-RA	2.82364	5.71135	0.00941201	Up	AT5G61210	membrane localized t-SNARE SNAP25 homologue, probably involved in cytokinesis and cell plate formation The mRNA is cell-to-cell mobile.	SNAP33
SHI_00005026-RA	2.90054	7.25584	0.00971566	Up	AT5G21130	Late embryogenesis abundant (LEA) hydroxyproline-rich glycoprotein family	AT5G21130
SHI_00019382-RA	2.86773	2.43782	0.00982783	Up	AT4G33530	potassium transporter	KUP5
SHI_00023732-RA	-2.25495	2.52121	0.0098785	Down	AT4G20170	glycosyltransferase family protein (DUF23)	GALS3

## Sheet: Table_S3
Table S3 Differentially expressed genes (DEGs) inlcuded in the enriched GO term response to jasmonic acid (GO:0009753)
Gene_ID	logFC	logCPM	FDR	Regulation	Annotation_ID	Description	Classification
SHI_00006752-RA	3.58396	1.95955	1.1e-05	Up	AT1G07900	LOB domain-containing protein 1	n.a.
SHI_00027147-RA	-2.27688	7.36448	3.14e-06	Down	AT1G11670	MATE efflux family protein	n.a.
SHI_00001134-RA	-2.93328	4.08433	0.000129034	Down	AT1G14920	Similar to a putative transcription factor and transcriptional coactivators. Repressor of GA responses and involved in gibberellic acid mediated signaling. Member of the DELLA proteins that restrain the cell proliferation and expansion that drives plant growth. The protein undergoes degradation in response to GA via the 26S proteasome. GAI may be involved in reducing ROS accumulation in response …	n.a.
SHI_00013294-RA	2.84993	3.32754	0.000200675	Up	AT1G20310	syringolide-induced protein	n.a.
SHI_00012118-RA	6.97757	2.14155	3.57e-18	Up	AT1G21550	Calcium-binding EF-hand family protein	Cluster 1
SHI_00027527-RA	4.39728	3.39658	1.61e-06	Up	AT1G25400	transmembrane protein	n.a.
SHI_00020867-RA	4.49286	5.00793	1.97e-11	Up	AT1G28480	Encodes GRX480, a member of the glutaredoxin family that regulates protein redox state. GRX480 interacts with TGA factors and suppresses JA-responsive PDF1.2 transcription. GRX480 transcription is SA-inducible and requires NPR1. Maybe involved in SA/JA cross-talk. It has also been shown to interact with the transcription factor TGA2 and suppress ORA59 promoter activity.	n.a.
SHI_00024016-RA	-2.4613	2.58093	0.000310125	Down	AT1G28600	GDSL-motif esterase/acyltransferase/lipase. Enzyme group with broad substrate specificity that may catalyze acyltransfer or hydrolase reactions with lipid and non-lipid substrates.	n.a.
SHI_00009215-RA	2.39764	5.88816	5.47e-08	Up	AT1G31130	polyadenylate-binding protein 1-B-binding protein	n.a.
SHI_00000899-RA	3.41837	5.43569	1.08e-05	Up	AT1G32690	DUF740 family protein	n.a.
SHI_00018266-RA	-2.94901	9.09367	2.41e-06	Down	AT1G32900	UDP-Glycosyltransferase superfamily protein	n.a.
SHI_00012187-RA	6.76472	3.24758	2.68e-19	Up	AT1G43160	encodes a member of the ERF (ethylene response factor) subfamily B-4 of ERF/AP2 transcription factor family (RAP2.6). The protein contains one AP2 domain. There are 7 members in this subfamily.	Cluster 1
SHI_00010546-RA	2.26784	8.31795	2.14e-07	Up	AT1G55020	lipoxygenase, a defense gene conferring resistance Xanthomonas campestris The mRNA is cell-to-cell mobile.	n.a.
SHI_00004256-RA	-2.00869	4.07482	1.29e-06	Down	AT1G61065	1,3-beta-glucan synthase component (DUF1218)	n.a.
SHI_00023317-RA	3.84093	4.50135	3.82e-06	Up	AT1G70810	Calcium-dependent lipid-binding (CaLB domain) family protein	n.a.
SHI_00024832-RA	2.18663	3.7623	6.89e-06	Up	AT1G73480	alpha/beta-Hydrolases superfamily protein	n.a.
SHI_00013293-RA	5.26763	5.52592	3.43e-26	Up	AT1G76070	hypothetical protein	n.a.
SHI_00021716-RA	7.07852	3.5488	1.72e-12	Up	AT1G80110	phloem protein 2-B11	Cluster 1
SHI_00027578-RA	3.39598	3.90902	0.00070117	Up	AT2G01300	mediator of RNA polymerase II transcription subunit	n.a.
SHI_00018374-RA	-2.27721	2.72879	0.000140448	Down	AT2G01570	Member of the VHIID/DELLA regulatory family. Contains homopolymeric serine and threonine residues, a putative nuclear localization signal, leucine heptad repeats, and an LXXLL motif. Putative transcriptional regulator repressing the gibberellin response and integration of phytohormone signalling. DELLAs repress cell proliferation and expansion that drives plant growth. The protein undergoes degra…	n.a.
SHI_00008894-RA	6.29222	7.35603	0.00764427	Up	AT2G14580	pathogenesis related protein, encodes a basic PR1-like protein. Expresses in flowers, roots, and not in leaves and responses to ethylene and methyl jasmonate. Salicylic acid represses gene expression.	Cluster 1
SHI_00008720-RA	3.4684	7.55531	0.00104795	Up	AT2G15760	calmodulin-binding protein (DUF1645)	n.a.
SHI_00000412-RA	4.34105	2.2913	0.000147193	Up	AT2G18210	hypothetical protein	n.a.
SHI_00011720-RA	4.56041	3.23346	0.000395169	Up	AT2G22860	Phytosulfokine 2 precursor, coding for a unique plant peptide growth factor. The mRNA is cell-to-cell mobile.	n.a.
SHI_00001621-RA	3.89666	2.44731	4.76e-13	Up	AT2G24600	Ankyrin repeat family protein	n.a.
SHI_00018559-RA	6.21218	5.64533	1.24e-30	Up	AT2G32800	protein kinase family protein	Cluster 1
SHI_00023900-RA	2.19137	2.07691	0.00121795	Up	AT2G34070	Encodes a member of the TBL (TRICHOME BIREFRINGENCE-LIKE) gene family containing a plant-specific DUF231 (domain of unknown function) domain. TBL gene family has 46 members, two of which (TBR/AT5G06700 and TBL3/AT5G01360) have been shown to be involved in the synthesis and deposition of secondary wall cellulose, presumably by influencing the esterification state of pectic polymers. A nomenclature…	n.a.
SHI_00005564-RA	5.16262	7.77639	1.18e-17	Up	AT2G36380	pleiotropic drug resistance 6	n.a.
SHI_00011204-RA	-4.75995	2.12269	4.58e-09	Down	AT2G38400	alanine:glyoxylate aminotransferase 2 homolog (AGT3) mRNA,	n.a.
SHI_00005720-RA	6.95387	1.68162	8.98e-09	Up	AT2G39030	Encodes a protein that acts as an ornithine N-delta-acetyltransferase, leading to the formation of N-delta-actetylornithine. This compound is likely used in plant defense and levels of it are increased in Arabidopsis plants in response to MeJA and ABA. The mRNA is cell-to-cell mobile.	Cluster 1
SHI_00011001-RA	3.63552	4.23603	0.000712531	Up	AT2G40330	Encodes a member of the PYR (pyrabactin resistance )/PYL(PYR1-like)/RCAR (regulatory components of ABA receptor) family proteins with 14 members. PYR/PYL/RCAR family proteins function as abscisic acid sensors. Mediate ABA-dependent regulation of protein phosphatase 2Cs ABI1 and ABI2.	n.a.
SHI_00006242-RA	-2.73	2.65804	2.75e-07	Down	AT2G44230	hypothetical protein (DUF946)	n.a.
SHI_00028232-RA	3.10574	3.51125	0.00136694	Up	AT3G13650	Disease resistance-responsive (dirigent-like protein) family protein	n.a.
SHI_00004155-RA	-2.31079	2.49971	0.00289725	Down	AT3G15510	Note of caution: not to be confused with another protein (AtNAC6 locus AT5G39610) which on occasion has also been referred to as AtNAC2.	n.a.
SHI_00020329-RA	5.09411	0.895923	8.98e-07	Up	AT3G15760	cytochrome P450 family protein	Cluster 1
SHI_00018348-RA	2.5673	5.53215	0.00136161	Up	AT3G16860	COBRA-like protein 8 precursor	n.a.
SHI_00027146-RA	2.22088	6.67078	6.6e-06	Up	AT3G21690	MATE efflux family protein	n.a.
SHI_00010133-RA	2.46401	5.67328	1.55e-13	Up	AT3G23240	encodes a member of the ERF (ethylene response factor) subfamily B-3 of ERF/AP2 transcription factor family (ERF1). The protein contains one AP2 domain. There are 18 members in this subfamily including ATERF-1, ATERF-2, AND ATERF-5. EREBP like protein that binds GCC box of ethylene regulated promoters such as basic chitinases. Constitutive expression of ERF1 phenocopies ethylene over production. …	n.a.
SHI_00029947-RA	2.93252	0.594409	8.91e-05	Up	AT3G55950	CRINKLY4 related 3	n.a.
SHI_00028548-RA	-2.03264	6.15153	0.000145808	Down	AT3G59440	Encodes an endomembrane localized member of the CML subfamily VII. Contains a canonical CaM domain and unique N-terminal extension that distinguishes it from other members of the subfamily.	n.a.
SHI_00026362-RA	5.55276	5.81142	7.01e-19	Up	AT3G60450	Phosphoglycerate mutase family protein	Cluster 1
SHI_00018742-RA	2.11167	0.557924	0.00233342	Up	AT4G14940	atao1 gene of Arabidopsis thaliana encodes an extracellular copper amine oxidase expressed during early stages of vascular tissue development.	n.a.
SHI_00028418-RA	7.21646	3.74193	1.51e-09	Up	AT4G22530	S-adenosyl-L-methionine-dependent methyltransferases superfamily protein	Cluster 1
SHI_00029160-RA	2.65218	1.68822	0.0090853	Up	AT4G30250	P-loop containing nucleoside triphosphate hydrolases superfamily protein	n.a.
SHI_00010325-RA	3.00084	1.63609	0.00629882	Up	AT5G02230	Haloacid dehalogenase-like hydrolase (HAD) superfamily protein	n.a.
SHI_00004752-RA	9.67645	4.74135	3.35e-14	Up	AT5G04330	Cytochrome P450 superfamily protein	Cluster 1
SHI_00014663-RA	2.16444	4.38937	3.64e-09	Up	AT5G08240	transmembrane protein	n.a.
SHI_00001572-RA	-2.4813	4.66711	0.000100237	Down	AT5G11790	Plays a role in dehydration stress response.	n.a.
SHI_00004902-RA	2.22288	1.94369	0.00328992	Up	AT5G13210	Uncharacterized conserved protein UCP015417, vWA	n.a.
SHI_00002828-RA	5.85283	5.62805	7.16e-12	Up	AT5G13220	Encodes JAZ10, a member of the JASMONATE ZIM-domain (JAZ) proteins acting as repressors of jasmonate (JA) signaling. An alternatively spliced form (JAZ10.4) of JAZ10 lacks the Jas domain.	Cluster 1
SHI_00014620-RA	5.90974	4.4259	1.66e-09	Up	AT5G13330	encodes a member of the ERF (ethylene response factor) subfamily B-4 of ERF/AP2 transcription factor family. The protein contains one AP2 domain. There are 7 members in this subfamily.	Cluster 1
SHI_00028767-RA	2.36577	4.41445	8.77e-06	Up	AT5G21105	Plant L-ascorbate oxidase	n.a.
SHI_00006151-RA	4.56463	1.29384	1.05e-06	Up	AT5G24080	Protein kinase superfamily protein	n.a.
SHI_00010646-RA	4.44679	0.802721	5.25e-09	Up	AT5G36220	member of CYP81D family of cytochrome p450s. This gene was originally called CYP91A1, but was later renamed to CYP81D1.	n.a.
SHI_00025755-RA	2.23948	1.97257	8.04e-05	Up	AT5G37500	Encodes a guard cell outward potassium channel. Belongs to the Shaker family K+ channel. This family includes five groups based on phylogenetic analysis (FEBS Letters (2007) 581: 2357): I (inward rectifying channel): AKT1 (AT2G26650), AKT5 (AT4G32500) and SPIK (also known as AKT6, AT2G25600)	n.a.
SHI_00003805-RA	6.11194	4.41502	5.33e-06	Up	AT5G38200	Class I glutamine amidotransferase-like superfamily protein	Cluster 1
SHI_00014451-RA	4.05194	6.79779	0.000723779	Up	AT5G38700	cotton fiber protein	n.a.
SHI_00008550-RA	4.52103	5.16337	1.34e-07	Up	AT5G42650	Encodes a member of the cytochrome p450 CYP74 gene family that functions as an allene oxide synthase. This enzyme catalyzes dehydration of the hydroperoxide to an unstable allene oxide in the JA biosynthetic pathway. It shows a dual catalytic activity, the major one being a 13-AOS but also expressing a 9-AOS activity. CFA-Leu, CFA-Val, CFA-Met and CFA-Ala can induce the expression of AOS.	n.a.
SHI_00004611-RA	7.19394	5.3933	2.06e-06	Up	AT5G42930	alpha/beta-Hydrolases superfamily protein	Cluster 1
SHI_00013410-RA	-3.38919	1.67636	7.82e-05	Down	AT5G46760	MYC3 is a JAZ-interacting transcription factor that act together with MYC2 and MYC4 to activate JA-responses. The mRNA is cell-to-cell mobile.	n.a.
SHI_00018228-RA	6.68379	1.91067	1.59e-06	Up	AT5G47220	Encodes a member of the ERF (ethylene response factor) subfamily B-3 of ERF/AP2 transcription factor family (ATERF-2). The protein contains one AP2 domain. Functions as activator of GCC box?dependent transcription. Positive regulator of JA-responsive defense genes and resistance to F. oxysporum and enhances JA inhibition of root elongation.	Cluster 1
SHI_00003720-RA	6.39546	2.41108	8.89e-18	Up	AT5G50760	SAUR-like auxin-responsive protein family	Cluster 1
SHI_00007368-RA	-2.20846	10.1819	3.48e-06	Down	AT5G55120	Encodes a GDP-L-galactose phosphorylase, with similar biochemical properties as VTC2.	n.a.
SHI_00003021-RA	7.03673	5.51012	6.63e-18	Up	AT5G62150	peptidoglycan-binding LysM domain-containing protein	Cluster 1
SHI_00027867-RA	3.73732	1.50849	0.000746244	Up	AT5G63490	CBS / octicosapeptide/Phox/Bemp1 (PB1) domains-containing protein	n.a.
SHI_00005401-RA	3.56773	8.97943	5.62e-15	Up	AT5G64260	EXORDIUM like 2	n.a.
SHI_00000327-RA	2.46787	3.13026	0.00774012	Up	AT5G64810	member of WRKY Transcription Factor	n.a.
SHI_00016541-RA	-3.28017	2.34883	0.000191453	Down	AT5G66590	CAP (Cysteine-rich secretory proteins, Antigen 5, and Pathogenesis-related 1 protein) superfamily protein	n.a.
SHI_00019778-RA	4.84693	3.86104	8.23e-11	Up	AT5G67050	alpha/beta-Hydrolases superfamily protein	n.a.
SHI_00009546-RA	9.21322	6.8981	3.67e-53	Up	AT5G67150	HXXXD-type acyl-transferase family protein	Cluster 1

## Sheet: Table_S4
Table S4 Differentially expressed genes (DEGs) inlcuded in the enriched GO term glucosinolate metabolic process (GO:0019760)
Gene_ID	logFC	logCPM	FDR	Regulation	Annotation_ID	Description	label
SHI_00027662-RA	-3.88168	1.12983	0.000626807	Down	AT1G12140	belongs to the flavin-monooxygenase (FMO) family, encodes a glucosinolate S-oxygenase that catalyzes the conversion of methylthioalkyl glucosinolates to methylsulfinylalkyl glucosinolates	FMO GS-OX5
SHI_00000804-RA	3.79501	1.91703	8.32e-08	Up	AT1G12630	encodes a member of the DREB subfamily A-4 of ERF/AP2 transcription factor family. The protein contains one AP2 domain. There are 17 members in this subfamily including TINY.	AT1G12630
SHI_00021662-RA	5.19035	7.0154	0.00218267	Up	AT1G56160	Encodes a member of the R2R3 transcription factor gene family that is involved in mediating induced systemic resistance. Genetic analysis of loss of function mutants and overexpressor lines indicates MYB72 is necessary but not sufficient for ISR.Interacts in vivo with EIL3.	MYB72
SHI_00029810-RA	3.325	6.86316	4.04e-08	Up	AT1G59870	ATP binding cassette transporter. Localized to the plasma membrane in uninfected cells. In infected leaves, the protein concentrated at infection sites. Contributes to nonhost resistance to inappropriate pathogens that enter by direct penetration in a salicylic acid?dependent manner. Required for mlo resistance. Has Cd transporter activity (Cd2+ extrusion pump) and contributes to heavy metal resi…	PEN3
SHI_00013942-RA	3.82015	0.78582	0.00022984	Up	AT1G68620	alpha/beta-Hydrolases superfamily protein	AT1G68620
SHI_00006917-RA	2.64691	1.0858	0.00739397	Up	AT2G43000	Encodes a NAC transcription factor induced by hydrogen peroxide (H2O2). Involved in senescence. Over expression of the gene strongly delays senescence and enhances tolerance to various abiotic stresses.	NAC042
SHI_00030940-RA	-5.97317	2.58279	0.0013614	Down	AT3G43110	transmembrane protein	AT3G43110
SHI_00012988-RA	-3.39287	2.07582	0.00808032	Down	AT4G10120	Encodes a protein with putative sucrose-phosphate synthase activity.	SPS4F
SHI_00008050-RA	7.37384	7.89838	1.05e-07	Up	AT4G31940	The gene encodes a cytochrome P450 enzyme, CYP82C. It is involved in the early Fe deficiency response.CYP82C4 hydroxylates fraxetin to generate sideretin (5-hydroxyfraxetin). Fraxetin and sideretin are catecholic coumarins secreted into the rhizosphere under conditions of low iron availability and help mobilize this nutrient from insoluble iron(III) pools in the soil.The mRNA is cell-to-cell mobi…	CYP82C4
SHI_00019271-RA	3.50614	5.8449	1.44e-07	Up	AT4G37260	Member of the R2R3 factor gene family. The mRNA is cell-to-cell mobile.	MYB73
SHI_00014620-RA	5.90974	4.4259	1.66e-09	Up	AT5G13330	encodes a member of the ERF (ethylene response factor) subfamily B-4 of ERF/AP2 transcription factor family. The protein contains one AP2 domain. There are 7 members in this subfamily.	RAP2.6L
SHI_00028297-RA	2.42228	1.53367	0.00364547	Up	AT5G63790	Encodes a member of the NAC family of transcription factors. ANAC102 appears to have a role in mediating response to low oxygen stress (hypoxia) in germinating seedlings. Its expression can be induced by beta-cyclocitral, an oxidized by-product of beta-carotene generated in the chloroplasts, mediates a protective retrograde response that lowers the levels of toxic peroxides and carbonyls, limitin…	NAC102

## Sheet: Table_S5
Table S4 Characterization of transcription factors between mite-feeding and control leaves of chia
Gene_ID	Annotation_ID	TF Families	Regulation	Network communities
SHI_00006203-RA	AT1G35540	ARF	Down	2
SHI_00000659-RA	AT4G23980	ARF	Down	2
SHI_00000233-RA	AT3G54990	AP2	Up	1
SHI_00022688-RA	AT3G54320	AP2	Up	4
SHI_00003428-RA	AT3G11580	B3	Up	3
SHI_00001536-RA	AT2G24690	B3	Up	4
SHI_00005146-RA	AT5G57720	B3	Up	3
SHI_00011209-RA	AT5G58280	B3	Up	3
SHI_00016720-RA	AT5G39860	bHLH	Down	n.a.
SHI_00019338-RA	AT5G10570	bHLH	Down	2
SHI_00027896-RA	AT2G18300	bHLH	Down	2
SHI_00019247-RA	AT1G35460	bHLH	Down	2
SHI_00014225-RA	AT2G42280	bHLH	Down	2
SHI_00028122-RA	AT4G34530	bHLH	Down	2
SHI_00024807-RA	AT5G50915	bHLH	Down	2
SHI_00013410-RA	AT5G46760	bHLH	Down	2
SHI_00013432-RA	AT1G31050	bHLH	Down	n.a.
SHI_00000244-RA	AT2G41130	bHLH	Down	2
SHI_00006092-RA	AT1G10610	bHLH	Down	2
SHI_00004267-RA	AT4G20970	bHLH	Up	4
SHI_00020966-RA	AT4G38070	bHLH	Up	5
SHI_00018156-RA	AT4G29930	bHLH	Up	3
SHI_00012971-RA	AT2G22760	bHLH	Up	4
SHI_00009062-RA	AT2G31730	bHLH	Up	n.a.
SHI_00028803-RA	AT1G73830	bHLH	Up	3
SHI_00017640-RA	AT2G40200	bHLH	Up	5
SHI_00005518-RA	AT2G28160	bHLH	Up	4
SHI_00028444-RA	AT5G06950	bZIP	Down	2
SHI_00030570-RA	AT1G08320	bZIP	Down	2
SHI_00026749-RA	AT1G77920	bZIP	Down	2
SHI_00011134-RA	AT2G16770	bZIP	Down	2
SHI_00025995-RA	AT4G02670	C2H2	Down	2
SHI_00014264-RA	AT3G58070	C2H2	Down	2
SHI_00020757-RA	AT1G25250	C2H2	Down	2
SHI_00003617-RA	AT2G45120	C2H2	Down	2
SHI_00010459-RA	AT2G45120	C2H2	Up	5
SHI_00019029-RA	AT2G17180	C2H2	Up	3
SHI_00007126-RA	AT5G43170	C2H2	Up	1
SHI_00024435-RA	AT2G37430	C2H2	Up	1
SHI_00005336-RA	AT3G19580	C2H2	Up	1
SHI_00028651-RA	AT2G19810	C3H	Down	2
SHI_00002119-RA	AT1G68200	C3H	Up	3
SHI_00004916-RA	AT2G47890	DBB	Down	2
SHI_00023898-RA	AT4G10240	DBB	Up	5
SHI_00005168-RA	AT5G60200	Dof	Up	3
SHI_00010450-RA	AT1G64620	Dof	Up	3
SHI_00025057-RA	AT5G62940	Dof	Up	3
SHI_00016768-RA	AT5G14960	E2F/DP	Up	4
SHI_00000340-RA	AT1G28370	ERF	Up	1
SHI_00023046-RA	AT5G64750	ERF	Up	1
SHI_00029734-RA	AT1G03800	ERF	Up	1
SHI_00024056-RA	AT1G28360	ERF	Up	1
SHI_00018227-RA	AT4G17500	ERF	Up	3
SHI_00012187-RA	AT1G43160	ERF	Up	3
SHI_00009255-RA	AT5G07310	ERF	Up	1
SHI_00010133-RA	AT3G23240	ERF	Up	3
SHI_00000687-RA	AT1G64380	ERF	Up	1
SHI_00027612-RA	AT5G61890	ERF	Up	4
SHI_00014620-RA	AT5G13330	ERF	Up	1
SHI_00015967-RA	AT1G22810	ERF	Up	4
SHI_00000804-RA	AT1G12630	ERF	Up	1
SHI_00022757-RA	AT2G31230	ERF	Up	5
SHI_00018228-RA	AT5G47220	ERF	Up	5
SHI_00004735-RA	AT2G33710	ERF	Up	1
SHI_00027984-RA	AT5G25190	ERF	Up	4
SHI_00029997-RA	AT5G07580	ERF	Up	1
SHI_00022756-RA	AT5G43410	ERF	Up	3
SHI_00025485-RA	AT3G07500	FAR1	Down	2
SHI_00013700-RA	AT5G18240	G2-like	Down	2
SHI_00024148-RA	AT5G29000	G2-like	Down	2
SHI_00027123-RA	AT2G20570	G2-like	Down	2
SHI_00016103-RA	AT1G69580	G2-like	Up	5
SHI_00015185-RA	AT1G25550	G2-like	Up	5
SHI_00020402-RA	AT4G26150	GATA	Down	2
SHI_00017027-RA	AT2G45050	GATA	Down	2
SHI_00005009-RA	AT3G16870	GATA	Up	4
SHI_00001134-RA	AT1G14920	GRAS	Down	2
SHI_00018374-RA	AT2G01570	GRAS	Down	2
SHI_00007110-RA	AT4G37740	GRF	Down	2
SHI_00006226-RA	AT2G06200	GRF	Down	2
SHI_00005503-RA	AT5G53660	GRF	Down	2
SHI_00012456-RA	AT3G60390	HD-ZIP	Down	2
SHI_00004555-RA	AT4G21750	HD-ZIP	Up	3
SHI_00003755-RA	AT5G66700	HD-ZIP	Up	4
SHI_00017376-RA	AT4G04890	HD-ZIP	Up	3
SHI_00017895-RA	AT4G11660	HSF	Down	2
SHI_00009594-RA	AT3G51910	HSF	Down	2
SHI_00014367-RA	AT3G22830	HSF	Down	2
SHI_00014191-RA	AT2G41690	HSF	Up	4
SHI_00012481-RA	AT1G67970	HSF	Up	4
SHI_00001397-RA	AT2G28500	LBD	Up	4
SHI_00000150-RA	AT1G67100	LBD	Up	1
SHI_00019307-RA	AT4G37540	LBD	Up	4
SHI_00020873-RA	AT1G06280	LBD	Up	4
SHI_00006752-RA	AT1G07900	LBD	Up	5
SHI_00024936-RA	AT1G18750	M-type_MADS	Down	2
SHI_00016694-RA	AT5G07700	MYB	Down	2
SHI_00029143-RA	AT1G08810	MYB	Down	2
SHI_00010941-RA	AT2G38090	MYB	Down	2
SHI_00011825-RA	AT3G46130	MYB	Down	2
SHI_00002509-RA	AT5G60890	MYB	Down	2
SHI_00014142-RA	AT3G61250	MYB	Down	2
SHI_00018471-RA	AT4G13480	MYB	Down	2
SHI_00010728-RA	AT3G53200	MYB	Up	4
SHI_00023146-RA	AT4G12350	MYB	Up	n.a.
SHI_00023408-RA	AT3G06490	MYB	Up	4
SHI_00016334-RA	AT2G47190	MYB	Up	3
SHI_00026361-RA	AT4G26930	MYB	Up	4
SHI_00020534-RA	AT2G31180	MYB	Up	1
SHI_00019271-RA	AT4G37260	MYB	Up	1
SHI_00028025-RA	AT1G35515	MYB	Up	4
SHI_00029857-RA	AT4G05100	MYB	Up	5
SHI_00030528-RA	AT4G28110	MYB	Up	1
SHI_00021662-RA	AT1G56160	MYB	Up	1
SHI_00020533-RA	AT3G23250	MYB	Up	1
SHI_00002667-RA	AT2G47460	MYB	Up	4
SHI_00024691-RA	AT1G18330	MYB_related	Down	2
SHI_00003256-RA	AT1G01060	MYB_related	Down	2
SHI_00010392-RA	AT1G01520	MYB_related	Down	2
SHI_00008597-RA	AT4G36570	MYB_related	Down	n.a.
SHI_00023623-RA	AT4G01060	MYB_related	Up	4
SHI_00004155-RA	AT3G15510	NAC	Down	2
SHI_00030360-RA	AT3G12910	NAC	Up	5
SHI_00003877-RA	AT1G65910	NAC	Up	3
SHI_00016695-RA	AT5G61430	NAC	Up	3
SHI_00005729-RA	AT5G14490	NAC	Up	4
SHI_00011996-RA	AT1G71930	NAC	Up	3
SHI_00028297-RA	AT5G63790	NAC	Up	1
SHI_00027670-RA	AT5G18270	NAC	Up	3
SHI_00012091-RA	AT1G01720	NAC	Up	1
SHI_00006917-RA	AT2G43000	NAC	Up	1
SHI_00028870-RA	AT2G34720	NF-YA	Down	2
SHI_00025320-RA	AT4G35270	Nin-like	Down	2
SHI_00024946-RA	AT1G18790	Nin-like	Up	4
SHI_00027104-RA	AT1G53160	SBP	Down	2
SHI_00001167-RA	AT1G69170	SBP	Up	3
SHI_00014589-RA	AT5G50570	SBP	Up	5
SHI_00000372-RA	AT3G51060	SRS	Down	2
SHI_00004716-RA	AT5G66350	SRS	Up	5
SHI_00028968-RA	AT1G33240	Trihelix	Down	2
SHI_00010973-RA	AT2G38250	Trihelix	Up	4
SHI_00027797-RA	AT5G17810	WOX	Up	3
SHI_00026646-RA	AT5G05770	WOX	Up	5
SHI_00009829-RA	AT1G46480	WOX	Up	1
SHI_00021153-RA	AT4G22070	WRKY	Down	2
SHI_00004567-RA	AT1G62300	WRKY	Up	5
SHI_00004325-RA	AT1G29860	WRKY	Up	4
SHI_00027352-RA	AT4G18170	WRKY	Up	5
SHI_00019761-RA	AT2G23320	WRKY	Up	4
SHI_00019282-RA	AT4G24240	WRKY	Up	5
SHI_00021918-RA	AT2G47260	WRKY	Up	1
SHI_00006552-RA	AT2G44745	WRKY	Up	1
SHI_00024970-RA	AT1G18860	WRKY	Up	5
SHI_00014081-RA	AT4G01250	WRKY	Up	1
SHI_00013631-RA	AT5G43290	WRKY	Up	4
SHI_00006173-RA	AT5G24110	WRKY	Up	1
SHI_00011493-RA	AT2G25000	WRKY	Up	1
SHI_00020798-RA	AT5G49520	WRKY	Up	4
SHI_00014995-RA	AT1G69810	WRKY	Up	1
SHI_00006866-RA	AT5G45260	WRKY	Up	1
SHI_00030476-RA	AT4G04450	WRKY	Up	3
SHI_00006812-RA	AT1G66550	WRKY	Up	1
SHI_00009432-RA	AT3G01970	WRKY	Up	4
SHI_00001727-RA	AT2G24570	WRKY	Up	3
SHI_00004306-RA	AT1G29280	WRKY	Up	5
SHI_00006389-RA	AT4G31800	WRKY	Up	1
SHI_00000689-RA	AT4G11070	WRKY	Up	1
SHI_00000327-RA	AT5G64810	WRKY	Up	3
SHI_00015096-RA	AT1G69310	WRKY	Up	3
SHI_00008505-RA	AT1G75240	ZF-HD	Down	2
SHI_00027457-RA	AT1G18835	ZF-HD	Up	1

## Sheet: Table_S6
Gene	Primer seq
SHI_00025320_F	AAGGTAGTGGGGCATACTCCA
SHI_00025320_R	GAACAGAGCCAATTTCAGCAGG
SHI_00014153_F	TCTCGGCCCATTTGTTAGAGTC
SHI_00014153_R	TGGTGAAGATGGCTCAAAGTGA
SHI_00008579_F	TTGTGATGGGGATTGGAAGAGG
SHI_00008579_R	TCCATACAAAGTTCCGCTGGAT
SHI_00011852_F	GTCGTCGCCAATTACCATCATG
SHI_00011852_R	GAGGAGCTGTACGAAGGTTTCA
SHI_00012091_F	CACCCAATCATCCAGCCTAAGG
SHI_00012091_R	TGTACGGTGAGAAGGAGTGGTA
SHI_00003877_F	TGGTTGCTACTTTCTCCTTGGA
SHI_00003877_R	ACTGGAAACTATGCTCTCTCCG
SHI_00006203_F	TGCTCGTGTTGTCTCAGCTATG
SHI_00006203_R	TAGATGCCTCCAACTGCTCCAT
SHI_00028968_F	TTCTGGCTGATTTTCTCCATCA
SHI_00028968_R	ACAACAGAAGTGCAAAGAGATG
SHI_00030476_F	GGATTGACTATGTTCCCCGGTC
SHI_00030476_R	GAAGCTGTGCCACCTCATTCAT
SHI_00024691_F	ACCAATGAAACCATCTATGAAGTT
SHI_00024691_R	ATGAGTGTACCAAGCATACCAA
SHI_00000340_F	GTTTTCGGGGAAGTTGAGCT
SHI_00000340_R	CCAATTTAGGAGAAACAAGCACG
SHI_00006226_F	TCAGGCAATATGTTCATGGGGT
SHI_00006226_R	TTCTGTTGAGTGGAAGACGGAC
SHI_00004697 (GAPDH)_F	CTTCAACTGGGGCTGAGTACAT
SHI_00004697 (GAPDH)_R	GGTAGCTGTGATGGAATGGACT
